# Supplementary material for: A new, large-bodied omnivorous bat (Noctilionoidea: Mystacinidae) reveals lost morphological and ecological diversity since the Miocene in New Zealand
Source: Sci Rep. 2018 Jan 10;8:235. doi: 10.1038/s41598-017-18403-w (PMC5762892; doi:10.1038/s41598-017-18403-w)
Supplement: Supplementary file 1 — Supplementary information [file 41598_2017_18403_MOESM1_ESM.pdf]

## SUPPLEMENTARY INFORMATION

A new, large-bodied omnivorous bat (Noctilionoidea: Mystacinidae) reveals lost morphological and ecological diversity since the Miocene in New Zealand

Suzanne J. Hand, Robin M. D. Beck, Michael Archer, Nancy B. Simmons, Gregg F. Gunnell, R. Paul Scofield, Alan J. D. Tennyson, Vanesa L. De Pietri, Steven W. Salisbury & Trevor H. Worthy

### List of comparative bat material used in this study

Institutional abbreviations: AM, Australian Museum, Sydney; AMNH, American Museum of Natural History Mammal Collection, New York; AR, Vertebrate Palaeontology Collection, University of New South Wales, Sydney; CGM, Cairo (= Egyptian) Geological Museum, Egypt; CM, Canterbury Museum, Christchurch; FMNH, Field Museum of Natural History, Chicago; MNHN, Muséum national d'Histoire naturelle, Paris; NMNZ, Museum of New Zealand Te Papa Tongarewa, Wellington; QM, Queensland Museum, Brisbane, Australia; SMF, Naturmuseum Senckenberg, Frankfurt; UF, University of Florida, Gainesville, USA; USNM, National Museum Natural History, Smithsonian Institution, Washington D. C.; YPM, Yale Peabody Museum, New Haven, Connecticut, USA.

Fossil specimens: Myzopodidae: *Phasmatonycteris butleri* CGM 83761, Fayum Quarry BQ-2, 23 m level, Birket Qarun Formation, Fayum Depression, Egypt, Late Eocene; *P. phiomensis* YPM 24198, Fayum Quarry I, 242 m level, Upper Gebel Qatrani Formation, Fayum Depression, Egypt, Early Oligocene. Mystacinidae: *Mystacina robusta* NMNZ S.35205, Exhale Air Cave, Ellis Basin, Mt Arthur, Nelson, New Zealand, Holocene; *M. tuberculata*

NMNZ S.32400-parts 1–20, Predator Cave, Takaka Hill, Nelson, New Zealand, Holocene; *M. miocenalis* CM 2013.18.381, NMNZ.S52355, and Mystacinidae indet. 1 & 2, NMNZ S.41867, S.42215, S.44260, S.51739, S.51742, S.52083, S.52401, S.52402, S.52920, Manuherikia River section, Bannockburn Formation, Home Hills Station, St Bathans, Central Otago, New Zealand, Early Miocene; *Icarops aenae* QM F30583–4, F30586, F24509, F30573-4 and *I. paradox* QM F30580–3, F30590, F31561, Riversleigh World Heritage Area, Queensland, Australia, Early Miocene. Phyllostomidae: *Notonycteris magdalenensis* UCMP 39960, 39962, 39963, IGM 252865, 252973, IGM-KU 90-C01, Villavieja Formation, Huila Department, La Venta, Colombia, Middle Miocene; *N. sucharadeus* IGM-KU 9305, IGM 252869, Villavieja Formation, Huila Department, La Venta, Colombia, Middle Miocene. Noctilionoid family indet.: *Speonycteris aurantiadens* UF 240000, University of Florida locality Brooksville 2, Hernando County, Florida, USA, Late Oligocene; *S. naturalis* UF121717 University of Florida locality I-75, Alachua County, Florida, USA, Early Oligocene.

Modern comparative specimens (and see also MorphoBank Project 2737): Craseonycteridae:

*Craseonycteris thonglongyai* SMF 54513. Emballonuridae: *Emballonura atrata* FMNH

176360; *Saccolaimus saccolaimus* AM M3491; *Saccolaimus bilineatus* AMNH M267842;

*Taphozous georgianus* AR20502. Furipteridae: *Furipterus horrens* AMNH M267213.

Hipposideridae: *Anthops ornatus* AM M5831; *Aselliscus tricuspidatus* SMF 24745;

*Hipposideros bicolor* AM M9231; *Hipposideros diadema* AR5194. Megadermatidae: *Lavia*

*frons* AR20507; *Macroderma gigas* AR20505. Miniopteridae: *Miniopterus orianae* AR1868;

*M. australis* AM M5556. Molossidae: *Cheiromeles parvidens* AMNH M241942; *Chaerephon*

*jobensis* QM JM5161; *Chaerephon plicatus* AMNH M107932; *Cynomops planirostris* AMNH

M234455; *Eumops auripendulus* AMNH M248212; *Molossus molossus* AMNH M267243;

*Mops brachypterus* AMNH M241062; *Mormopterus beccarii* AM M8509; *Mormopterus*

*planiceps* AR20503; *Myopterus daubentonii* AMNH M48855; *Promops nasutus* AMNH

M184648; *Tadarida australis* AM M7910. Mormoopidae: *Mormoops blainvillei* AMNH M238144; *Pteronotus davyi* AMNH M204961. Mystacinidae: *Mystacina tuberculata* NMNZ LM1231. Myzopodidae: *Myzopoda aurita* USNM 448932; MNHN 1907.618. Natalidae: *Natalus stramineus* USNM 362103. Noctilionidae: *Noctilio albiventris* USNM 390592. Nycteridae: *Nycteris capensis* AM M6071; *Nycteris javanica* AMNH M103269. Phyllostomidae: *Anoura geoffroyi* AMNH M264935; *Artibeus jamaicensis* AR21504; *Desmodus rotundus* AMNH M248941; *Glossophaga soricina* AMNH M230206; *Micronycteris hirsuta* AMNH M267860; *Phyllostomus hastatus* AMNH M267901; *Tonatia saurophila* AMNH M267912; *Trachops cirrhosus* AMNH M266081. Pteropodidae: *Balionycteris maculata* AMNH M233970; *Nyctimene robinsoni* AR17520; *Pteropus scapulatus* AR4764, AR4764A; *Rousettus amplexicaudatus* USNM 78616. Rhinolophidae: *Rhinolophus megaphyllus* AR1655. Rhinonycteridae: *Rhinonictis aurantia* AR20501. Rhinopomatidae: *Rhinopoma hardwickei* AR21506. Thyropteridae: *Thyroptera tricolor* AMNH M266356. Vespertilionidae: *Antrozous pallidus* USNM 564036; *Chalinolobus morio* AR1653; *Chalinolobus gouldii* QM JM5061; *Eptesicus fuscus* AMNH M139513; *Falsistrellus tasmaniensis* AM M3360; *Kerivoula papillosa* AMNH M247576; *Myotis macropus* AM M5453; *Nyctophilus gouldi* AM M12548; *Scoteanax ruepelli* AM M5163; *Scotorepens orion* AM M5163; *Vespadelus vulturnus* AM M11413.

### **Description of specimens referred to *Vulcanops jennyworthyae* gen. et sp. nov.**

The holotype (CM 2013.18.790) is a dentary preserving m2-3. The specimen is broken anteriorly through the posterior root of m1, and posterodorsally such that the mandibular foramen and part of the masseteric fossa are preserved but not the ascending ramus (coronoid process), mandibular condyle or angular process. The horizontal (mandibular) ramus has a

straight ventral margin. The mandibular foramen is large and elongate, opening posterodorsally well below the level of the tooth row.

The m1 (NMNZ S.42876, NMNZ S.52078) has two roots and five cusps. The trigonid is shorter and conspicuously narrower than the talonid. The protoconid, hypoconid and entoconid are the dominant cusps in terms of both height and volume. The protoconid is taller than the hypoconid, which is taller than the entoconid, which is taller than the metaconid and paraconid. The hypoconulid is a small cingular cusp. The protoconid and hypoconid have buccally rounded, smooth flanks; the protoconid shows more wear than the other cusps. The cristid obliqua, in occlusal view, is curved and contacts the trigonid at a point conspicuously buccal to the midpoint between the protoconid and metaconid. In lateral view, there is a slight buccal inflexion in the cristid obliqua close to the trigonid. The postcristid extends from the hypoconid directly to the entoconid, almost perpendicular to the axis of the tooth row, isolating the hypoconulid and thereby exhibiting the myotodont condition. The greatly bowed curve in the hypocristid, best seen in posterior view, occurs approximately midway between the hypoconid and entoconid. The angle between the para- and protocristids is wide, at  $\sim 75^\circ$ . The cristid obliqua and paracristid are subparallel. A small crest extends between the metaconid and paraconid. A steeply dipping, curved and inflected entocristid attenuates at the base of the metaconid without completely closing the talonid basin lingually. There is a non-sinuuous, continuous anterior, buccal and posterior cingulid: it is narrow buccally, particularly around the face of the hypoconid. The posterior portion of the cingulid is wider than the anterior cingulid.

The m2 (CM 2013.18.790) is described in so far as it differs from m1. The trigonid is relatively wider. The entoconid is taller than the hypoconid, metaconid and paraconid. All portions of the continuous cingulid are of similar width.

The m3 (CM AV 2013.18.790) is shorter and narrower than m1-2. The trigonid is wider than the talonid. The talonid cusps (including the entoconid) are lower than the trigonid cusps. The hypoconulid is smaller. The hypoconid is less buccally rounded. The cristid obliqua contacts the trigonid at a point closer to the junction of the components of the protocristid.

Referral of the upper teeth (described below) to the same taxon as the lower dentition is based on their provenance, appropriate size and evident occlusal relationships. Representatives of all known tooth positions (m1, m2, m3, M1, M2, M3) were recovered from Bed HH1a, a 5–10 cm thick sandy conglomerate in the Manuherikia River section.

M1 (CM 2013.18.916, NMNZ S.44071, S.51461, CM 2013.18.1) is approximately as wide as long. The metacone is more massive than the paracone but topographically similar in height. The buccal basin of the paracone is very shallow, the basin of the metacone slightly deeper. The protocone is the most voluminous cusp. The apex of the protocone is just posterolingual to the paracone apex. The ectoloph is W-shaped, with the centrocrista reaching the buccal margin of the tooth. A conical parastyle is variably developed. A mesostyle is present but is not cuspidate; the metastyle is pronounced. The buccal margin of the tooth is relatively straight (and oblique with respect to the paracone), with a very shallow postectoflexus. An indistinct, variably present ectocingulum runs between the parastyle and mesostyle and/or mesostyle and metastyle. The preparacrista is shorter than the postparacrista, which is shorter than the premetacrista, which in turn is shorter than the postmetacrista. In CM 2013.18.916, the latter is especially elongated (twice postparacrista length). The pre- and postparacrista meet at an angle just over 90°, the pre- and postmetacristae at ~80° and the postparacrista and premetacrista ~60°. There is no clear paraloph or metaloph. The protofossa is deep and broad, and opens posteriorly. The preprotocrista continues buccally as a narrow paracingulum. The posterobuccally directed postprotocrista does not reach the metacone

base, and terminates in a metaconule. An indistinct cingulum extends from a point posterior to the protocone base to the metastyle, but it does not connect to the cingulum enclosing the well-developed heel. The cingulum is massively swollen lingually (near the protocone), forming a hypocone. The hypocone itself is cuspidate or bulbous rather than crested. The heel is long (representing half the lingual length of the crown), relatively wide (40% the width of the crown), and directed posterolingually. An indentation in the lingual border of the crown separating the hypocone from the protocone base is variably developed. There is no cingulum around the protocone. The tooth has three roots; the protocone root is long (anteroposteriorly) and broad, the metacone root large and triangular, and the paracone root smaller and circular.

NMNZ S.50383 and NMNZ S.51746 are upper molars similar in size and overall morphology to NMNZ S.44071, NMNZ S.51461, CM 2013.18.1 and CM 2013.18.916. They differ from those molars in features typically distinguishing M2 from M1 in bats, and are described in so far as they differ from M1. M2 is wider (especially anteriorly) and has a larger paracone and deeper paracone basin. The preparacrista is only just shorter than the subequal postparacrista and premetacrista and longer postmetacrista. The buccal cingulum is more distinct. There is no paraloph or metaloph. The cingulum enclosing the well-developed heel forms a tall hypocone anterolingually (near the protocone), as in M1. The paracone and metacone root are more similar in size, the protocone root being again very long and broad.

M3 (NMNZ S.52400, S.52351, S.50384) is wider than long; it is shorter and narrower than M2. It retains a metacone, subequal in height to the paracone. The preparacrista is longer than the subequal postparacrista and premetacrista, and bears a wear facet from the m3 protocrisid. The paracingulum is narrow as in M1-2, and the protofossa broad and deep. There is no paraloph. The posterobuccally directed postprotocrisid meets the base of the metacone, enclosing the protofossa. A buccal cingulum extends from parastyle to metacone,

attenuating slightly at the mesostyle. There is no anterolingual cingulum, but the heel-like posterolingual cingulum bears a distinct cusplule (hypocone). The protocone root and lingually displaced metacone root are similar in size and probably larger than the broken paracone root.

## **SUPPLEMENTARY DATASET 1**

**TABLE S1.** Taxon-character matrix comprising 292 dental characters scored for 45 yangochiropterans (35 extant and 10 fossil species) plus 2 yinpterochiropteran outgroup taxa is available in the MorphoBank repository as Project 2737 (<http://morphobank.org/permalink/?P2737>)

## **SUPPLEMENTARY DATASET 2**

**TABLE S2.** List of synapomorphies for nodes under Accelerated Transformation (ACCTRAN) and Delayed Transformation (DELTRAN) from Bayesian analysis of total evidence matrix.

1. Bayesian analysis of total evidence data - synapomorphies under Accelerated Transformation (ACCTRAN)

P A U P \*

Version 4.0a152 for 32-bit Microsoft Windows (built on Jan 26 2017 at 21:47:42)

Thu Jun 22 09:33:46 2017

-----NOTICE-----

This is an alpha-test version that is still changing rapidly.  
It will expire on 1 Jul 2017.

Please report bugs to [david.swofford@duke.edu](mailto:david.swofford@duke.edu)

paup> set opt=acctran;

/----- *Speonycteris aurantiadens*  
 /---88  
 | \----- *Micronycteris hirsuta*  
 /-----87  
 | \----- *Mimon bennettii*  
 | /----- *Macrotus californicus*  
 +-----71  
 | \----- *Macrotus waterhousii*  
 | /----- *Desmodus rotundus*  
 /---72  
 /---86 | \----- *Diaemus youngi*  
 | | /-----73  
 | | | \----- *Diphylla ecaudata*  
 | | | /----- *Lophostoma evotis*  
 | | | +----- *Phyllostomus hastatus hastatus*  
 /---76  
 | | /----- *Phylloderma stenops stenops*

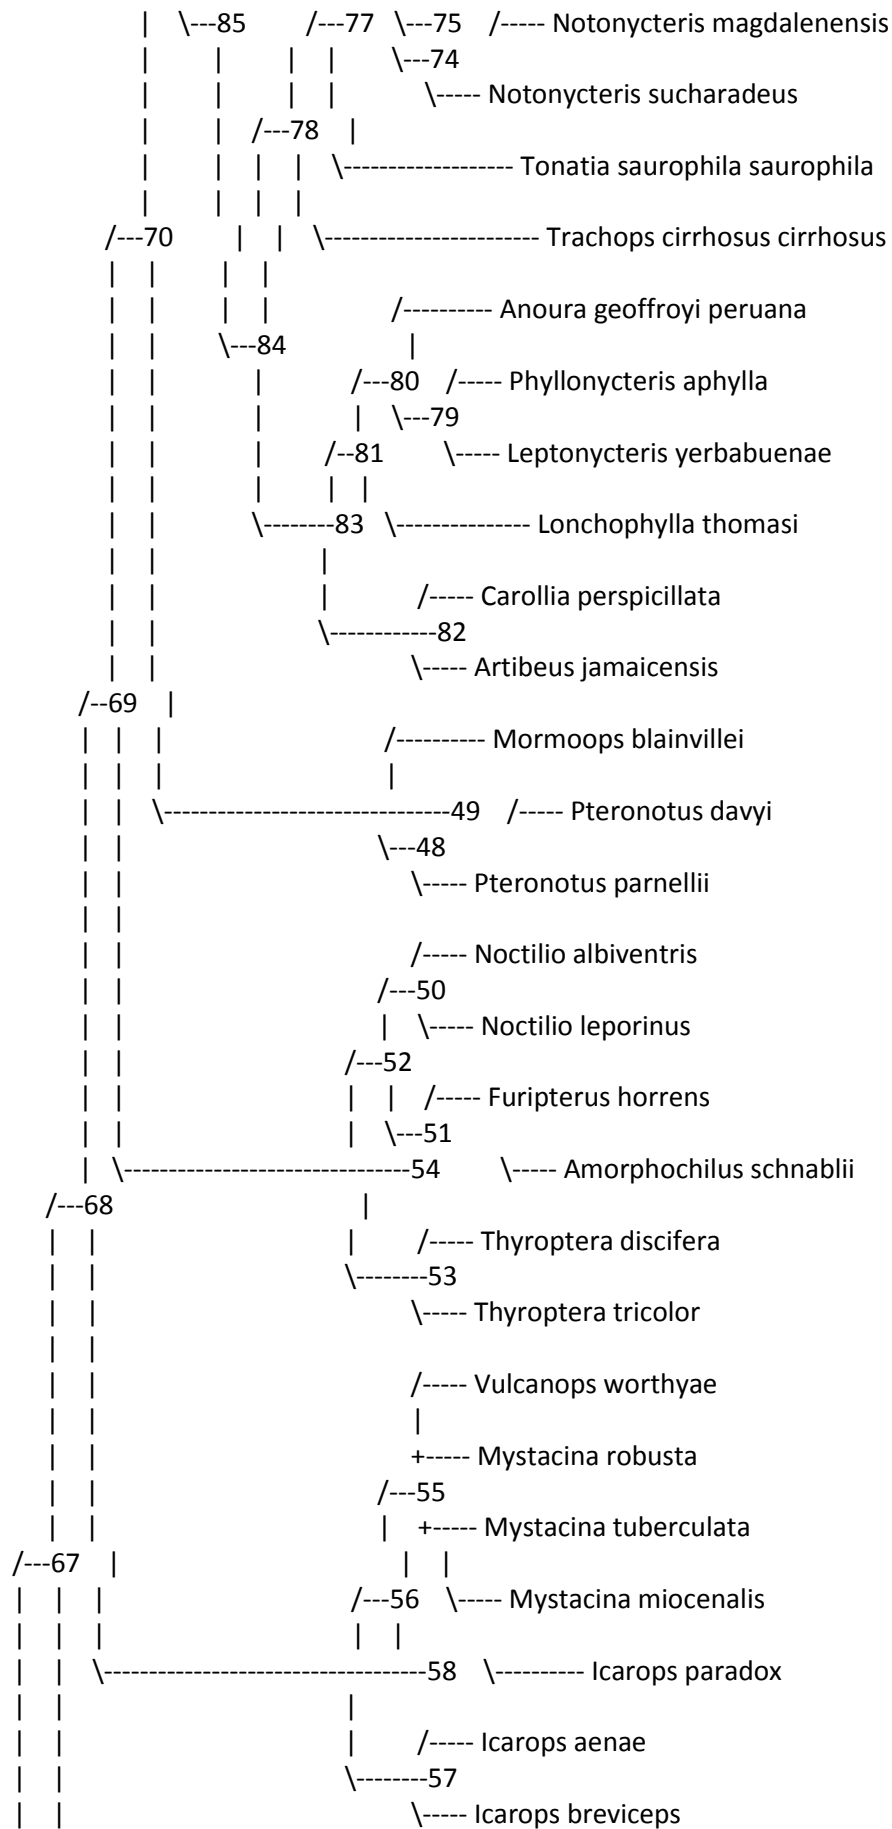

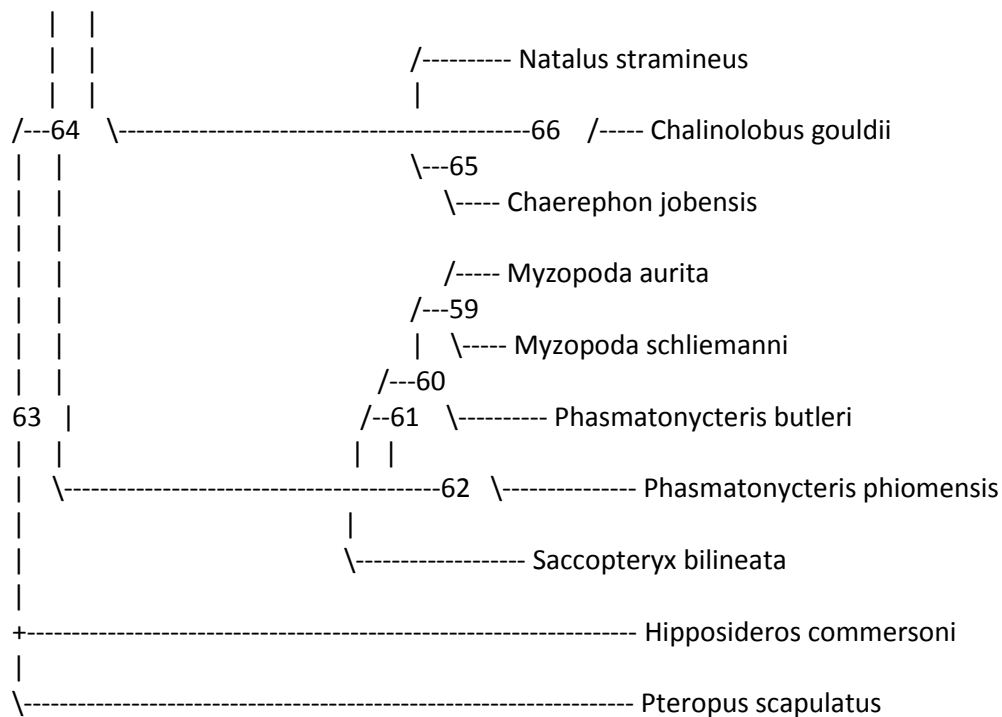

Apomorphy lists:

| Branch              | Character | Steps | CI      | Change  |
|---------------------|-----------|-------|---------|---------|
| node_63 --> node_64 | 5         | 1     | 0.273   | 1 ==> 0 |
| 16                  | 1         | 0.222 | 0 --> 1 |         |
| 18                  | 1         | 0.167 | 0 --> 1 |         |
| 29                  | 2         | 0.214 | 2 ==> 0 |         |
| 50                  | 2         | 0.400 | 0 --> 2 |         |
| 61                  | 1         | 0.154 | 1 --> 0 |         |
| 102                 | 1         | 0.200 | 1 --> 2 |         |
| 105                 | 1         | 0.133 | 0 --> 1 |         |
| 112                 | 1         | 0.125 | 0 --> 1 |         |
| 120                 | 1         | 0.143 | 0 --> 1 |         |
| 123                 | 1         | 0.167 | 0 --> 1 |         |
| 129                 | 1         | 0.154 | 0 --> 1 |         |
| 136                 | 1         | 0.500 | 0 --> 1 |         |
| 153                 | 1         | 0.222 | 2 --> 1 |         |
| 154                 | 1         | 0.143 | 1 ==> 0 |         |
| 155                 | 1         | 0.200 | 1 --> 0 |         |
| 158                 | 1         | 0.200 | 0 ==> 1 |         |
| 186                 | 2         | 0.158 | 1 --> 3 |         |
| 187                 | 2         | 0.158 | 0 --> 2 |         |
| 194                 | 1         | 0.143 | 1 ==> 2 |         |
| 206                 | 1         | 0.286 | 1 --> 2 |         |
| 210                 | 1         | 0.200 | 1 ==> 2 |         |
| 214                 | 1         | 0.333 | 2 --> 3 |         |
| 233                 | 1         | 0.286 | 0 --> 1 |         |
| 242                 | 2         | 0.333 | 0 --> 2 |         |
| 267                 | 1         | 0.154 | 1 --> 0 |         |

|             |         |   |       |   |       |         |
|-------------|---------|---|-------|---|-------|---------|
|             | 274     | 1 | 0.250 | 1 | -->   | 2       |
|             | 275     | 1 | 0.333 | 1 | -->   | 2       |
| node_64 --> | node_67 | 9 |       | 1 | 0.250 | 0 --> 1 |
|             | 11      | 1 | 0.250 | 0 | ==>   | 1       |
|             | 13      | 1 | 0.273 | 1 | -->   | 2       |
|             | 40      | 1 | 0.231 | 2 | -->   | 3       |
|             | 52      | 1 | 1.000 | 0 | -->   | 1       |
|             | 55      | 1 | 0.167 | 1 | ==>   | 0       |
|             | 97      | 1 | 0.125 | 0 | -->   | 1       |
|             | 98      | 1 | 0.286 | 0 | -->   | 4       |
|             | 192     | 1 | 0.214 | 1 | -->   | 3       |
|             | 215     | 1 | 0.143 | 0 | -->   | 1       |
|             | 278     | 1 | 0.091 | 1 | -->   | 0       |
| node_67 --> | node_68 | 6 |       | 2 | 1.000 | 0 --> 2 |
|             | 12      | 1 | 0.455 | 1 | ==>   | 0       |
|             | 16      | 1 | 0.222 | 1 | -->   | 0       |
|             | 74      | 1 | 0.200 | 1 | -->   | 0       |
|             | 84      | 1 | 0.200 | 2 | -->   | 0       |
|             | 117     | 1 | 0.167 | 0 | -->   | 1       |
|             | 155     | 1 | 0.200 | 0 | -->   | 1       |
|             | 156     | 1 | 0.500 | 1 | -->   | 2       |
|             | 200     | 1 | 0.500 | 0 | -->   | 1       |
|             | 220     | 1 | 0.111 | 0 | -->   | 1       |
|             | 260     | 1 | 0.250 | 0 | -->   | 1       |
|             | 277     | 1 | 0.091 | 0 | -->   | 1       |
| node_68 --> | node_69 | 1 |       | 1 | 0.100 | 0 --> 1 |
|             | 24      | 1 | 0.100 | 1 | -->   | 0       |
|             | 29      | 1 | 0.214 | 0 | -->   | 1       |
|             | 34      | 1 | 0.158 | 1 | ==>   | 0       |
|             | 36      | 1 | 0.333 | 0 | -->   | 1       |
|             | 60      | 1 | 0.158 | 2 | -->   | 1       |
|             | 61      | 1 | 0.154 | 0 | -->   | 1       |
|             | 106     | 1 | 0.107 | 0 | -->   | 1       |
|             | 164     | 1 | 0.222 | 1 | ==>   | 2       |
|             | 184     | 1 | 0.143 | 1 | -->   | 0       |
|             | 196     | 1 | 0.200 | 0 | -->   | 1       |
|             | 202     | 1 | 0.182 | 0 | -->   | 1       |
|             | 275     | 1 | 0.333 | 2 | -->   | 1       |
|             | 278     | 1 | 0.091 | 0 | -->   | 1       |
| node_69 --> | node_70 | 5 |       | 1 | 0.273 | 0 --> 1 |
|             | 13      | 1 | 0.273 | 2 | ==>   | 3       |
|             | 18      | 1 | 0.167 | 1 | -->   | 0       |
|             | 29      | 1 | 0.214 | 1 | ==>   | 2       |
|             | 41      | 1 | 1.000 | 0 | -->   | 1       |
|             | 42      | 1 | 1.000 | 1 | -->   | 0       |
|             | 59      | 1 | 0.125 | 1 | -->   | 0       |
|             | 60      | 1 | 0.158 | 1 | ==>   | 0       |
|             | 67      | 1 | 0.143 | 1 | -->   | 2       |
|             | 69      | 1 | 0.154 | 1 | -->   | 0       |
|             | 106     | 1 | 0.107 | 1 | -->   | 2       |
|             | 110     | 1 | 0.143 | 2 | ==>   | 1       |

|                     |   |       |   |     |   |
|---------------------|---|-------|---|-----|---|
| 111                 | 1 | 0.111 | 0 | --> | 1 |
| 127                 | 1 | 0.138 | 2 | ==> | 1 |
| 128                 | 1 | 0.143 | 0 | ==> | 1 |
| 158                 | 1 | 0.200 | 1 | --> | 0 |
| 173                 | 2 | 0.286 | 2 | ==> | 0 |
| 215                 | 1 | 0.143 | 1 | ==> | 0 |
| 216                 | 1 | 1.000 | 1 | --> | 0 |
| 234                 | 1 | 0.200 | 1 | ==> | 0 |
| 241                 | 1 | 0.250 | 0 | ==> | 1 |
| node_70 --> node_86 |   |       |   |     |   |
| 19                  | 1 | 0.200 | 0 | --> | 1 |
| 23                  | 1 | 0.133 | 1 | --> | 0 |
| 49                  | 1 | 0.286 | 0 | ==> | 1 |
| 54                  | 1 | 0.200 | 0 | ==> | 1 |
| 78                  | 1 | 0.200 | 1 | --> | 0 |
| 93                  | 1 | 0.200 | 0 | --> | 1 |
| 97                  | 1 | 0.125 | 1 | --> | 0 |
| 131                 | 1 | 0.444 | 1 | ==> | 2 |
| 139                 | 4 | 0.227 | 1 | ==> | 5 |
| 140                 | 2 | 0.222 | 0 | ==> | 2 |
| 152                 | 1 | 0.333 | 1 | ==> | 0 |
| 167                 | 1 | 0.154 | 2 | --> | 1 |
| 263                 | 1 | 0.222 | 0 | ==> | 1 |
| 267                 | 1 | 0.154 | 0 | --> | 1 |
| 271                 | 1 | 0.200 | 1 | --> | 0 |
| node_86 --> node_87 |   |       |   |     |   |
| 23                  | 1 | 0.133 | 0 | --> | 1 |
| 25                  | 1 | 0.200 | 2 | ==> | 3 |
| 51                  | 1 | 0.167 | 0 | ==> | 1 |
| 59                  | 1 | 0.125 | 0 | --> | 1 |
| 71                  | 1 | 0.111 | 2 | ==> | 1 |
| 83                  | 1 | 0.200 | 0 | ==> | 1 |
| 108                 | 1 | 0.333 | 0 | ==> | 1 |
| 124                 | 1 | 0.333 | 0 | ==> | 1 |
| 143                 | 1 | 0.200 | 0 | ==> | 1 |
| 153                 | 1 | 0.222 | 1 | --> | 0 |
| 165                 | 1 | 0.125 | 1 | --> | 2 |
| 184                 | 1 | 0.143 | 0 | --> | 1 |
| 203                 | 1 | 0.250 | 1 | --> | 0 |
| 210                 | 1 | 0.200 | 2 | --> | 1 |
| 260                 | 1 | 0.250 | 1 | ==> | 0 |
| node_87 --> node_88 |   |       |   |     |   |
| 24                  | 1 | 0.100 | 0 | --> | 1 |
| 34                  | 1 | 0.158 | 0 | --> | 1 |
| 38                  | 1 | 0.250 | 0 | ==> | 1 |
| 53                  | 1 | 0.125 | 0 | --> | 1 |
| 55                  | 1 | 0.167 | 0 | --> | 1 |
| 57                  | 1 | 0.286 | 0 | --> | 1 |
| 60                  | 2 | 0.158 | 0 | --> | 2 |
| 63                  | 2 | 0.125 | 0 | ==> | 2 |
| 87                  | 1 | 0.250 | 0 | --> | 1 |
| 98                  | 1 | 0.286 | 4 | --> | 3 |
| 103                 | 1 | 0.200 | 1 | --> | 2 |
| 106                 | 1 | 0.107 | 2 | --> | 3 |

|                                          |   |       |   |     |                 |
|------------------------------------------|---|-------|---|-----|-----------------|
| 112                                      | 1 | 0.125 | 1 | --> | 2               |
| 135                                      | 1 | 0.200 | 0 | --> | 1               |
| 146                                      | 1 | 0.250 | 1 | --> | 0               |
| 161                                      | 1 | 0.167 | 0 | --> | 1               |
| 164                                      | 1 | 0.222 | 2 | ==> | 1               |
| 253                                      | 1 | 0.278 | 1 | --> | 0               |
| node_88 --> Speonycteris aurantiadens 23 |   |       |   |     | 1 0.133 1 ==> 2 |
| 27                                       | 1 | 1.000 | 0 | ==> | 1               |
| 165                                      | 1 | 0.125 | 2 | --> | 1               |
| 167                                      | 1 | 0.154 | 1 | --> | 2               |
| 176                                      | 1 | 0.400 | 0 | ==> | 1               |
| 186                                      | 1 | 0.158 | 3 | ==> | 4               |
| 187                                      | 1 | 0.158 | 2 | ==> | 3               |
| 192                                      | 1 | 0.214 | 3 | ==> | 1               |
| 202                                      | 1 | 0.182 | 1 | ==> | 2               |
| 210                                      | 1 | 0.200 | 1 | --> | 2               |
| 220                                      | 1 | 0.111 | 1 | ==> | 0               |
| 221                                      | 1 | 0.143 | 1 | ==> | 0               |
| 237                                      | 1 | 0.333 | 1 | ==> | 0               |
| 252                                      | 1 | 0.182 | 0 | ==> | 1               |
| 264                                      | 1 | 0.200 | 0 | ==> | 1               |
| node_88 --> Micronycteris hirsuta 26     |   |       |   |     | 1 0.250 0 ==> 1 |
| 31                                       | 1 | 0.286 | 1 | ==> | 2               |
| 61                                       | 1 | 0.154 | 1 | ==> | 0               |
| 64                                       | 1 | 0.667 | 1 | ==> | 2               |
| 162                                      | 1 | 0.364 | 2 | ==> | 1               |
| 172                                      | 1 | 0.167 | 0 | ==> | 1               |
| 203                                      | 1 | 0.250 | 0 | --> | 1               |
| 207                                      | 1 | 0.100 | 0 | --> | 1               |
| 221                                      | 1 | 0.143 | 1 | ==> | 2               |
| 253                                      | 1 | 0.278 | 0 | --> | 2               |
| 263                                      | 1 | 0.222 | 1 | ==> | 0               |
| node_87 --> Mimon bennettii 1            |   |       |   |     | 1 0.100 1 ==> 0 |
| 16                                       | 1 | 0.222 | 0 | --> | 1               |
| 18                                       | 1 | 0.167 | 0 | ==> | 1               |
| 47                                       | 1 | 0.200 | 1 | ==> | 0               |
| 49                                       | 1 | 0.286 | 1 | ==> | 0               |
| 54                                       | 1 | 0.200 | 1 | ==> | 0               |
| 84                                       | 1 | 0.200 | 0 | --> | 2               |
| 93                                       | 1 | 0.200 | 1 | --> | 0               |
| 105                                      | 1 | 0.133 | 1 | ==> | 0               |
| 106                                      | 2 | 0.107 | 2 | ==> | 0               |
| 111                                      | 1 | 0.111 | 1 | ==> | 0               |
| 117                                      | 1 | 0.167 | 1 | ==> | 0               |
| 120                                      | 1 | 0.143 | 1 | ==> | 2               |
| 128                                      | 1 | 0.143 | 1 | ==> | 0               |
| 148                                      | 2 | 0.143 | 2 | ==> | 0               |
| 150                                      | 1 | 0.200 | 0 | ==> | 1               |
| 167                                      | 1 | 0.154 | 1 | ==> | 0               |
| 174                                      | 1 | 0.167 | 0 | ==> | 1               |
| 196                                      | 1 | 0.200 | 1 | ==> | 0               |

|                                                               |   |       |   |     |   |
|---------------------------------------------------------------|---|-------|---|-----|---|
| 223                                                           | 1 | 0.222 | 1 | ==> | 2 |
| 226                                                           | 1 | 0.111 | 0 | ==> | 1 |
| 232                                                           | 1 | 0.200 | 1 | ==> | 0 |
| 234                                                           | 1 | 0.200 | 0 | ==> | 1 |
| 269                                                           | 1 | 0.222 | 0 | ==> | 1 |
| 271                                                           | 1 | 0.200 | 0 | --> | 1 |
| 278                                                           | 1 | 0.091 | 1 | ==> | 0 |
| node_86 --> node_71      37      1   0.200   1 ==> 0          |   |       |   |     |   |
| 53                                                            | 1 | 0.125 | 0 | ==> | 1 |
| 56                                                            | 1 | 0.250 | 0 | ==> | 1 |
| 63                                                            | 1 | 0.125 | 0 | ==> | 1 |
| 84                                                            | 1 | 0.200 | 0 | --> | 2 |
| 98                                                            | 1 | 0.286 | 4 | ==> | 2 |
| 105                                                           | 1 | 0.133 | 1 | ==> | 2 |
| 106                                                           | 1 | 0.107 | 2 | ==> | 3 |
| 118                                                           | 1 | 0.375 | 4 | ==> | 2 |
| 132                                                           | 1 | 0.250 | 0 | ==> | 1 |
| 146                                                           | 1 | 0.250 | 1 | ==> | 0 |
| 161                                                           | 1 | 0.167 | 0 | ==> | 1 |
| 167                                                           | 1 | 0.154 | 1 | --> | 2 |
| 186                                                           | 2 | 0.158 | 3 | ==> | 1 |
| 207                                                           | 1 | 0.100 | 0 | --> | 1 |
| 208                                                           | 1 | 0.250 | 0 | ==> | 1 |
| 215                                                           | 1 | 0.143 | 0 | ==> | 1 |
| 217                                                           | 1 | 0.286 | 2 | ==> | 1 |
| 220                                                           | 1 | 0.111 | 1 | ==> | 2 |
| 223                                                           | 1 | 0.222 | 1 | ==> | 2 |
| 235                                                           | 1 | 0.250 | 1 | ==> | 2 |
| 236                                                           | 1 | 0.143 | 0 | --> | 1 |
| 237                                                           | 1 | 0.333 | 1 | ==> | 2 |
| node_71 --> Macrotus californicus 20      1   0.333   0 ==> 1 |   |       |   |     |   |
| 61                                                            | 1 | 0.154 | 1 | ==> | 0 |
| 78                                                            | 1 | 0.200 | 0 | --> | 1 |
| 112                                                           | 1 | 0.125 | 1 | ==> | 0 |
| 148                                                           | 1 | 0.143 | 2 | ==> | 1 |
| 170                                                           | 1 | 0.333 | 0 | ==> | 1 |
| 192                                                           | 1 | 0.214 | 3 | ==> | 2 |
| 221                                                           | 1 | 0.143 | 1 | ==> | 2 |
| 226                                                           | 1 | 0.111 | 0 | ==> | 1 |
| 236                                                           | 1 | 0.143 | 1 | --> | 2 |
| 250                                                           | 1 | 0.222 | 1 | ==> | 0 |
| 253                                                           | 1 | 0.278 | 1 | ==> | 0 |
| node_71 --> Macrotus waterhousii 26      1   0.250   0 ==> 1  |   |       |   |     |   |
| 34                                                            | 1 | 0.158 | 0 | ==> | 1 |
| 38                                                            | 1 | 0.250 | 0 | ==> | 1 |
| 58                                                            | 1 | 0.167 | 2 | ==> | 1 |
| 69                                                            | 1 | 0.154 | 0 | --> | 1 |
| 87                                                            | 1 | 0.250 | 0 | ==> | 1 |
| 123                                                           | 1 | 0.167 | 1 | ==> | 2 |
| 131                                                           | 1 | 0.444 | 2 | ==> | 3 |
| 182                                                           | 1 | 0.200 | 0 | ==> | 1 |

|                     |   |       |       |       |   |
|---------------------|---|-------|-------|-------|---|
| 185                 | 1 | 0.250 | 0     | ==>   | 1 |
| 187                 | 2 | 0.158 | 2     | ==>   | 0 |
| 195                 | 1 | 0.182 | 0     | ==>   | 1 |
| 206                 | 1 | 0.286 | 2     | ==>   | 1 |
| 244                 | 1 | 0.333 | 0     | ==>   | 1 |
| 249                 | 1 | 0.111 | 0     | ==>   | 1 |
| 250                 | 1 | 0.222 | 1     | ==>   | 2 |
| 254                 | 2 | 0.182 | 2     | ==>   | 0 |
| 270                 | 1 | 0.333 | 0     | ==>   | 1 |
| node_86 --> node_85 | 5 | 1     | 0.273 | 1 --> | 2 |
| 11                  | 1 | 0.250 | 1     | -->   | 0 |
| 19                  | 1 | 0.200 | 1     | -->   | 0 |
| 31                  | 1 | 0.286 | 1     | -->   | 0 |
| 50                  | 1 | 0.400 | 2     | -->   | 1 |
| 61                  | 1 | 0.154 | 1     | -->   | 2 |
| 69                  | 1 | 0.154 | 0     | -->   | 1 |
| 110                 | 1 | 0.143 | 1     | -->   | 2 |
| 119                 | 1 | 0.333 | 0     | -->   | 1 |
| 127                 | 2 | 0.138 | 1     | -->   | 3 |
| 134                 | 1 | 0.200 | 1     | -->   | 0 |
| 167                 | 1 | 0.154 | 1     | -->   | 0 |
| 175                 | 1 | 0.143 | 1     | -->   | 2 |
| 185                 | 2 | 0.250 | 0     | ==>   | 2 |
| 187                 | 1 | 0.158 | 2     | -->   | 1 |
| 194                 | 2 | 0.143 | 2     | -->   | 0 |
| 195                 | 1 | 0.182 | 0     | -->   | 2 |
| 220                 | 1 | 0.111 | 1     | -->   | 0 |
| 245                 | 2 | 0.222 | 0     | -->   | 2 |
| 247                 | 1 | 0.200 | 1     | -->   | 0 |
| 252                 | 1 | 0.182 | 0     | -->   | 1 |
| 255                 | 1 | 0.200 | 1     | -->   | 0 |
| 260                 | 1 | 0.250 | 1     | -->   | 2 |
| 264                 | 1 | 0.200 | 0     | -->   | 1 |
| 269                 | 1 | 0.222 | 0     | -->   | 1 |
| node_85 --> node_73 | 5 | 1     | 0.273 | 2 --> | 4 |
| 12                  | 5 | 0.455 | 0     | ==>   | 5 |
| 14                  | 1 | 0.667 | 0     | -->   | 2 |
| 17                  | 1 | 0.200 | 0     | -->   | 1 |
| 20                  | 1 | 0.333 | 0     | ==>   | 1 |
| 21                  | 1 | 0.125 | 0     | ==>   | 1 |
| 25                  | 2 | 0.200 | 2     | ==>   | 0 |
| 29                  | 1 | 0.214 | 2     | ==>   | 3 |
| 38                  | 1 | 0.250 | 0     | ==>   | 1 |
| 39                  | 1 | 0.333 | 0     | ==>   | 1 |
| 46                  | 1 | 0.250 | 0     | ==>   | 1 |
| 58                  | 1 | 0.167 | 2     | -->   | 1 |
| 64                  | 1 | 0.667 | 1     | ==>   | 0 |
| 69                  | 1 | 0.154 | 1     | ==>   | 2 |
| 70                  | 1 | 0.400 | 2     | ==>   | 1 |
| 75                  | 1 | 0.333 | 0     | ==>   | 1 |
| 98                  | 1 | 0.286 | 4     | ==>   | 0 |

|                                  |    |       |       |         |
|----------------------------------|----|-------|-------|---------|
| 101                              | 1  | 0.500 | 0 ==> | 1       |
| 105                              | 1  | 0.133 | 1 --> | 0       |
| 110                              | 2  | 0.143 | 2 ==> | 4       |
| 114                              | 1  | 0.250 | 0 ==> | 1       |
| 118                              | 1  | 0.375 | 4 ==> | 0       |
| 127                              | 1  | 0.138 | 3 ==> | 4       |
| 130                              | 1  | 0.333 | 0 ==> | 1       |
| 159                              | 1  | 0.250 | 0 ==> | 1       |
| 160                              | 1  | 0.111 | 0 ==> | 1       |
| 162                              | 1  | 0.364 | 2 ==> | 4       |
| 164                              | 2  | 0.222 | 2 ==> | 0       |
| 165                              | 1  | 0.125 | 1 ==> | 0       |
| 169                              | 1  | 0.200 | 0 ==> | 1       |
| 178                              | 1  | 0.250 | 0 ==> | 1       |
| 186                              | 1  | 0.158 | 3 --> | 2       |
| 187                              | 1  | 0.158 | 1 ==> | 0       |
| 189                              | 1  | 1.000 | 1 ==> | 2       |
| 207                              | 1  | 0.100 | 0 --> | 1       |
| 217                              | 2  | 0.286 | 2 ==> | 0       |
| 221                              | 1  | 0.143 | 1 ==> | 0       |
| 223                              | 1  | 0.222 | 1 ==> | 0       |
| 227                              | 2  | 0.286 | 0 ==> | 2       |
| 233                              | 1  | 0.286 | 1 ==> | 2       |
| 235                              | 1  | 0.250 | 1 --> | 0       |
| 236                              | 1  | 0.143 | 0 ==> | 1       |
| 237                              | 1  | 0.333 | 1 --> | 0       |
| 239                              | 1  | 1.000 | 0 ==> | 1       |
| 243                              | 2  | 0.333 | 0 ==> | 2       |
| 251                              | 2  | 0.333 | 0 ==> | 2       |
| 252                              | 1  | 0.182 | 1 ==> | 2       |
| 253                              | 1  | 0.278 | 1 ==> | 5       |
| 259                              | 1  | 0.125 | 0 --> | 1       |
| 262                              | 3  | 0.375 | 0 --> | 3       |
| 263                              | 1  | 0.222 | 1 --> | 2       |
| 264                              | 1  | 0.200 | 1 --> | 2       |
| 265                              | 1  | 0.500 | 0 ==> | 1       |
| node_73 --> node_72              | 15 | 1     | 0.250 | 0 ==> 1 |
| 146                              | 1  | 0.250 | 1 --> | 0       |
| 149                              | 1  | 0.333 | 0 ==> | 1       |
| 153                              | 1  | 0.222 | 1 ==> | 0       |
| 202                              | 1  | 0.182 | 1 ==> | 0       |
| 204                              | 1  | 0.500 | 1 ==> | 0       |
| 257                              | 1  | 1.000 | 0 ==> | 1       |
| node_72 --> Desmodus rotundus 25 | 1  | 0.200 | 0 --> | 1       |
| 58                               | 2  | 0.167 | 1 ==> | 3       |
| 63                               | 1  | 0.125 | 0 ==> | 1       |
| 67                               | 2  | 0.143 | 2 ==> | 0       |
| 106                              | 2  | 0.107 | 2 ==> | 0       |
| 113                              | 1  | 1.000 | 0 ==> | 1       |
| 154                              | 1  | 0.143 | 0 ==> | 1       |
| 158                              | 2  | 0.200 | 0 ==> | 2       |

|                               |     |   |       |   |     |   |
|-------------------------------|-----|---|-------|---|-----|---|
|                               | 186 | 1 | 0.158 | 2 | --> | 3 |
|                               | 220 | 1 | 0.111 | 0 | --> | 1 |
|                               | 251 | 1 | 0.333 | 2 | --> | 1 |
| node_72 --> Diaemus youngi    | 70  | 1 | 0.400 | 1 | ==> | 0 |
|                               | 145 | 1 | 0.667 | 0 | ==> | 3 |
|                               | 151 | 1 | 0.400 | 0 | ==> | 1 |
|                               | 210 | 1 | 0.200 | 2 | ==> | 3 |
|                               | 222 | 1 | 0.500 | 0 | ==> | 1 |
| node_73 --> Diphylla ecaudata | 76  | 1 | 0.500 | 0 | ==> | 1 |
|                               | 146 | 1 | 0.250 | 1 | ==> | 2 |
|                               | 152 | 3 | 0.333 | 0 | ==> | 3 |
|                               | 153 | 1 | 0.222 | 1 | ==> | 2 |
|                               | 186 | 1 | 0.158 | 2 | ==> | 1 |
| node_85 --> node_84           | 9   | 1 | 0.250 | 1 | --> | 0 |
|                               | 16  | 1 | 0.222 | 0 | --> | 1 |
|                               | 24  | 1 | 0.100 | 0 | --> | 1 |
|                               | 66  | 1 | 0.286 | 0 | --> | 1 |
|                               | 71  | 1 | 0.111 | 2 | --> | 1 |
|                               | 93  | 1 | 0.200 | 1 | --> | 0 |
|                               | 148 | 1 | 0.143 | 2 | --> | 1 |
| node_84 --> node_78           | 11  | 1 | 0.250 | 0 | --> | 1 |
|                               | 19  | 1 | 0.200 | 0 | --> | 1 |
|                               | 29  | 1 | 0.214 | 2 | ==> | 1 |
|                               | 47  | 1 | 0.200 | 1 | ==> | 2 |
|                               | 61  | 1 | 0.154 | 2 | --> | 1 |
|                               | 83  | 1 | 0.200 | 0 | ==> | 1 |
|                               | 106 | 1 | 0.107 | 2 | ==> | 3 |
|                               | 110 | 1 | 0.143 | 2 | --> | 1 |
|                               | 127 | 2 | 0.138 | 3 | --> | 1 |
|                               | 129 | 1 | 0.154 | 1 | --> | 2 |
|                               | 167 | 1 | 0.154 | 0 | --> | 1 |
|                               | 179 | 1 | 0.333 | 1 | --> | 2 |
|                               | 184 | 1 | 0.143 | 0 | --> | 1 |
|                               | 186 | 1 | 0.158 | 3 | ==> | 4 |
|                               | 187 | 2 | 0.158 | 1 | ==> | 3 |
|                               | 188 | 1 | 0.250 | 0 | ==> | 1 |
|                               | 194 | 2 | 0.143 | 0 | --> | 2 |
|                               | 195 | 1 | 0.182 | 2 | --> | 0 |
|                               | 221 | 1 | 0.143 | 1 | ==> | 2 |
|                               | 245 | 2 | 0.222 | 2 | --> | 0 |
|                               | 247 | 1 | 0.200 | 0 | --> | 1 |
|                               | 252 | 1 | 0.182 | 1 | --> | 0 |
|                               | 255 | 1 | 0.200 | 0 | --> | 1 |
|                               | 260 | 2 | 0.250 | 2 | ==> | 0 |
|                               | 263 | 1 | 0.222 | 1 | ==> | 0 |
|                               | 264 | 1 | 0.200 | 1 | --> | 0 |
| node_78 --> node_77           | 2   | 1 | 0.167 | 0 | --> | 1 |
|                               | 53  | 1 | 0.125 | 0 | --> | 1 |
|                               | 54  | 1 | 0.200 | 1 | --> | 0 |
|                               | 66  | 1 | 0.286 | 1 | --> | 0 |
|                               | 71  | 1 | 0.111 | 1 | --> | 2 |

|                                              |       |       |     |     |      |
|----------------------------------------------|-------|-------|-----|-----|------|
| 97                                           | 1     | 0.125 | 0   | --> | 1    |
| 105                                          | 1     | 0.133 | 1   | --> | 2    |
| 112                                          | 1     | 0.125 | 1   | --> | 0    |
| 143                                          | 1     | 0.200 | 0   | --> | 1    |
| 185                                          | 1     | 0.250 | 2   | --> | 1    |
| 220                                          | 2     | 0.111 | 0   | ==> | 2    |
| 269                                          | 1     | 0.222 | 1   | --> | 0    |
| node_77 --> node_76                          |       |       |     |     |      |
| 60                                           | 2     | 0.158 | 0   | --> | 2    |
| 194                                          | 1     | 0.143 | 2   | --> | 1    |
| node_76 --> Lophostoma evotis 2              |       |       |     |     |      |
| 1                                            | 0.167 | 1     | --> | 0   |      |
| 5                                            | 1     | 0.273 | 2   | ==> | 0    |
| 14                                           | 1     | 0.667 | 0   | ==> | 1    |
| 25                                           | 1     | 0.200 | 2   | ==> | 3    |
| 82                                           | 1     | 0.500 | 0   | ==> | 1    |
| 84                                           | 1     | 0.200 | 0   | ==> | 3    |
| 100                                          | 1     | 0.333 | 0   | ==> | 1    |
| 107                                          | 1     | 0.333 | 1   | ==> | 0    |
| 108                                          | 1     | 0.333 | 0   | ==> | 2    |
| 111                                          | 1     | 0.111 | 1   | ==> | 0    |
| 123                                          | 1     | 0.167 | 1   | ==> | 2    |
| 124                                          | 1     | 0.333 | 0   | ==> | 2    |
| 129                                          | 1     | 0.154 | 2   | --> | 1    |
| 146                                          | 1     | 0.250 | 1   | ==> | 0    |
| 148                                          | 1     | 0.143 | 1   | ==> | 2    |
| 150                                          | 1     | 0.200 | 0   | ==> | 1    |
| 161                                          | 1     | 0.167 | 0   | ==> | 1    |
| 177                                          | 2     | 0.500 | 0   | ==> | 2    |
| 179                                          | 1     | 0.333 | 2   | --> | 1    |
| 195                                          | 1     | 0.182 | 0   | ==> | 1    |
| 214                                          | 3     | 0.333 | 3   | ==> | 0    |
| 233                                          | 1     | 0.286 | 1   | ==> | 0    |
| 235                                          | 1     | 0.250 | 1   | ==> | 2    |
| 259                                          | 1     | 0.125 | 0   | ==> | {12} |
| node_76 --> Phyllostomus hastatus hastatus 5 |       |       |     |     |      |
| 1                                            | 0.273 | 2     | --> | 1   |      |
| 33                                           | 1     | 0.500 | 1   | ==> | 0    |
| 34                                           | 1     | 0.158 | 0   | ==> | 1    |
| 47                                           | 2     | 0.200 | 2   | ==> | 0    |
| 53                                           | 1     | 0.125 | 1   | --> | 0    |
| 59                                           | 1     | 0.125 | 0   | ==> | 1    |
| 61                                           | 1     | 0.154 | 1   | ==> | 0    |
| 66                                           | 1     | 0.286 | 0   | ==> | 1    |
| 67                                           | 1     | 0.143 | 2   | ==> | 1    |
| 71                                           | 1     | 0.111 | 2   | --> | 1    |
| 78                                           | 1     | 0.200 | 0   | --> | 1    |
| 97                                           | 1     | 0.125 | 1   | --> | 0    |
| 100                                          | 1     | 0.333 | 0   | ==> | 2    |
| 105                                          | 1     | 0.133 | 2   | --> | 1    |
| 106                                          | 3     | 0.107 | 3   | ==> | 0    |
| 112                                          | 2     | 0.125 | 0   | ==> | 2    |
| 120                                          | 1     | 0.143 | 1   | ==> | 0    |
| 134                                          | 1     | 0.200 | 0   | --> | 1    |

|                                               |   |       |   |     |   |
|-----------------------------------------------|---|-------|---|-----|---|
| 160                                           | 1 | 0.111 | 0 | ==> | 1 |
| 167                                           | 1 | 0.154 | 1 | ==> | 2 |
| 174                                           | 1 | 0.167 | 0 | ==> | 1 |
| 190                                           | 1 | 0.167 | 0 | ==> | 1 |
| 194                                           | 1 | 0.143 | 1 | ==> | 0 |
| 210                                           | 1 | 0.200 | 2 | ==> | 1 |
| 220                                           | 1 | 0.111 | 2 | ==> | 1 |
| 221                                           | 1 | 0.143 | 2 | ==> | 1 |
| 253                                           | 1 | 0.278 | 1 | ==> | 0 |
| 277                                           | 1 | 0.091 | 1 | ==> | 0 |
| node_76 --> node_75                           |   |       |   |     |   |
| 1                                             | 1 | 0.100 | 1 | --> | 0 |
| 18                                            | 1 | 0.167 | 0 | --> | 1 |
| 20                                            | 1 | 0.333 | 0 | --> | 1 |
| 24                                            | 1 | 0.100 | 1 | --> | 0 |
| 29                                            | 2 | 0.214 | 1 | --> | 3 |
| 51                                            | 1 | 0.167 | 0 | --> | 1 |
| 58                                            | 1 | 0.167 | 2 | --> | 1 |
| 60                                            | 2 | 0.158 | 2 | --> | 0 |
| 120                                           | 1 | 0.143 | 1 | --> | 2 |
| 145                                           | 1 | 0.667 | 0 | --> | 2 |
| 151                                           | 1 | 0.400 | 0 | --> | 1 |
| 153                                           | 1 | 0.222 | 1 | --> | 0 |
| 154                                           | 1 | 0.143 | 0 | --> | 1 |
| 162                                           | 1 | 0.364 | 2 | --> | 1 |
| 165                                           | 1 | 0.125 | 1 | --> | 0 |
| 185                                           | 1 | 0.250 | 1 | --> | 0 |
| 194                                           | 1 | 0.143 | 1 | --> | 2 |
| 234                                           | 1 | 0.200 | 0 | ==> | 1 |
| 249                                           | 1 | 0.111 | 0 | ==> | 1 |
| 278                                           | 1 | 0.091 | 1 | --> | 0 |
| node_75 --> Phylloderma stenops stenops 78    |   |       |   |     |   |
| 1                                             | 1 | 0.200 | 0 | --> | 1 |
| 123                                           | 1 | 0.167 | 1 | ==> | 2 |
| 129                                           | 2 | 0.154 | 2 | ==> | 0 |
| 226                                           | 1 | 0.111 | 0 | ==> | 1 |
| node_75 --> node_74                           |   |       |   |     |   |
| 115                                           | 1 | 0.333 | 1 | --> | 0 |
| 118                                           | 1 | 0.375 | 4 | --> | 1 |
| 122                                           | 1 | 0.250 | 3 | --> | 4 |
| 123                                           | 1 | 0.167 | 1 | --> | 0 |
| 127                                           | 1 | 0.138 | 1 | --> | 0 |
| 233                                           | 1 | 0.286 | 1 | ==> | 0 |
| node_74 --> Notonycteris magdalenensis 243    |   |       |   |     |   |
| 1                                             | 1 | 0.333 | 0 | ==> | 1 |
| 263                                           | 1 | 0.222 | 0 | ==> | 1 |
| node_77 --> Tonatia saurophila saurophila 190 |   |       |   |     |   |
| 1                                             | 1 | 0.167 | 0 | ==> | 1 |
| 195                                           | 1 | 0.182 | 0 | ==> | 1 |
| 202                                           | 1 | 0.182 | 1 | ==> | 0 |
| node_78 --> Trachops cirrhosus cirrhosus 14   |   |       |   |     |   |
| 1                                             | 1 | 0.667 | 0 | ==> | 1 |
| 16                                            | 1 | 0.222 | 1 | ==> | 2 |
| 26                                            | 2 | 0.250 | 0 | ==> | 2 |
| 34                                            | 1 | 0.158 | 0 | ==> | 1 |
| 58                                            | 1 | 0.167 | 2 | ==> | 1 |
| 61                                            | 1 | 0.154 | 1 | ==> | 0 |

|                     |    |       |       |     |     |   |
|---------------------|----|-------|-------|-----|-----|---|
| 84                  | 1  | 0.200 | 0     | --> | 2   |   |
| 85                  | 1  | 0.200 | 1     | ==> | 0   |   |
| 86                  | 1  | 0.400 | 0     | ==> | 1   |   |
| 87                  | 1  | 0.250 | 0     | ==> | 1   |   |
| 100                 | 1  | 0.333 | 0     | ==> | 3   |   |
| 103                 | 1  | 0.200 | 1     | ==> | 2   |   |
| 108                 | 1  | 0.333 | 0     | ==> | 1   |   |
| 111                 | 1  | 0.111 | 1     | ==> | 0   |   |
| 112                 | 1  | 0.125 | 1     | ==> | 2   |   |
| 120                 | 1  | 0.143 | 1     | ==> | 2   |   |
| 122                 | 1  | 0.250 | 3     | ==> | 4   |   |
| 124                 | 1  | 0.333 | 0     | ==> | 1   |   |
| 134                 | 1  | 0.200 | 0     | --> | 1   |   |
| 140                 | 1  | 0.222 | 2     | ==> | 1   |   |
| 152                 | 1  | 0.333 | 0     | ==> | 1   |   |
| 165                 | 1  | 0.125 | 1     | ==> | 2   |   |
| 177                 | 1  | 0.500 | 0     | ==> | 1   |   |
| 182                 | 1  | 0.200 | 0     | ==> | 1   |   |
| 192                 | 1  | 0.214 | 3     | ==> | 1   |   |
| 193                 | 1  | 0.200 | 1     | ==> | 0   |   |
| 203                 | 1  | 0.250 | 1     | ==> | 0   |   |
| 210                 | 1  | 0.200 | 2     | ==> | 1   |   |
| 223                 | 1  | 0.222 | 1     | ==> | 2   |   |
| 235                 | 1  | 0.250 | 1     | ==> | 2   |   |
| 236                 | 1  | 0.143 | 0     | ==> | 2   |   |
| 237                 | 1  | 0.333 | 1     | ==> | 2   |   |
| 267                 | 1  | 0.154 | 1     | ==> | 0   |   |
| 271                 | 1  | 0.200 | 0     | --> | 1   |   |
| 277                 | 1  | 0.091 | 1     | ==> | 0   |   |
| 278                 | 1  | 0.091 | 1     | ==> | 0   |   |
| node_84 --> node_83 | 13 | 1     | 0.273 | 3   | --> | 2 |
| 31                  | 1  | 0.286 | 0     | --> | 1   |   |
| 49                  | 1  | 0.286 | 1     | --> | 2   |   |
| 55                  | 1  | 0.167 | 0     | --> | 1   |   |
| 60                  | 1  | 0.158 | 0     | --> | 1   |   |
| 65                  | 1  | 0.200 | 1     | ==> | 0   |   |
| 78                  | 1  | 0.200 | 0     | --> | 1   |   |
| 106                 | 1  | 0.107 | 2     | --> | 1   |   |
| 120                 | 1  | 0.143 | 1     | --> | 0   |   |
| 122                 | 1  | 0.250 | 3     | --> | 2   |   |
| 123                 | 1  | 0.167 | 1     | ==> | 0   |   |
| 128                 | 1  | 0.143 | 1     | --> | 0   |   |
| 173                 | 1  | 0.286 | 0     | --> | 1   |   |
| 175                 | 1  | 0.143 | 2     | --> | 1   |   |
| 196                 | 1  | 0.200 | 1     | --> | 0   |   |
| 219                 | 1  | 0.125 | 0     | ==> | 1   |   |
| 253                 | 1  | 0.278 | 1     | --> | 0   |   |
| 269                 | 1  | 0.222 | 1     | ==> | 2   |   |
| 274                 | 1  | 0.250 | 2     | ==> | 1   |   |
| 275                 | 1  | 0.333 | 1     | --> | 2   |   |
| node_83 --> node_81 | 5  | 1     | 0.273 | 2   | --> | 1 |

|                     |   |       |       |     |       |
|---------------------|---|-------|-------|-----|-------|
| 21                  | 1 | 0.125 | 0     | ==> | 1     |
| 25                  | 2 | 0.200 | 2     | --> | 0     |
| 26                  | 1 | 0.250 | 0     | --> | 1     |
| 29                  | 1 | 0.214 | 2     | ==> | 3     |
| 34                  | 1 | 0.158 | 0     | ==> | 1     |
| 37                  | 1 | 0.200 | 1     | ==> | 0     |
| 50                  | 1 | 0.400 | 1     | ==> | 0     |
| 63                  | 1 | 0.125 | 0     | ==> | 1     |
| 84                  | 1 | 0.200 | 0     | --> | 2     |
| 105                 | 1 | 0.133 | 1     | ==> | 2     |
| 112                 | 1 | 0.125 | 1     | --> | 0     |
| 117                 | 1 | 0.167 | 1     | --> | 0     |
| 119                 | 1 | 0.333 | 1     | --> | 0     |
| 129                 | 1 | 0.154 | 1     | --> | 0     |
| 131                 | 1 | 0.444 | 2     | ==> | 1     |
| 139                 | 4 | 0.227 | 5     | ==> | 1     |
| 140                 | 2 | 0.222 | 2     | ==> | 0     |
| 152                 | 1 | 0.333 | 0     | --> | 1     |
| 159                 | 1 | 0.250 | 0     | ==> | 1     |
| 160                 | 1 | 0.111 | 0     | ==> | 1     |
| 172                 | 1 | 0.167 | 0     | ==> | 1     |
| 178                 | 1 | 0.250 | 0     | ==> | 1     |
| 180                 | 1 | 0.500 | 0     | ==> | 1     |
| 182                 | 1 | 0.200 | 0     | ==> | 1     |
| 192                 | 1 | 0.214 | 3     | ==> | 0     |
| 206                 | 1 | 0.286 | 2     | ==> | 1     |
| 220                 | 1 | 0.111 | 0     | --> | 1     |
| 249                 | 1 | 0.111 | 0     | --> | 1     |
| 253                 | 1 | 0.278 | 0     | --> | 4     |
| 280                 | 1 | 0.125 | 2     | ==> | 1     |
| node_81 --> node_80 | 1 | 1     | 0.100 | 1   | --> 0 |
| 12                  | 1 | 0.455 | 0     | --> | 1     |
| 13                  | 1 | 0.273 | 2     | --> | 1     |
| 63                  | 1 | 0.125 | 1     | --> | 2     |
| 71                  | 1 | 0.111 | 1     | --> | 2     |
| 106                 | 2 | 0.107 | 1     | ==> | 3     |
| 114                 | 1 | 0.250 | 0     | --> | 1     |
| 115                 | 1 | 0.333 | 1     | --> | 0     |
| 127                 | 1 | 0.138 | 3     | --> | 2     |
| 145                 | 1 | 0.667 | 0     | --> | 4     |
| 149                 | 1 | 0.333 | 0     | --> | 1     |
| 151                 | 1 | 0.400 | 0     | --> | 3     |
| 154                 | 1 | 0.143 | 0     | --> | 1     |
| 158                 | 1 | 0.200 | 0     | --> | 1     |
| 164                 | 1 | 0.222 | 2     | --> | 1     |
| 165                 | 1 | 0.125 | 1     | ==> | 0     |
| 170                 | 1 | 0.333 | 0     | --> | 1     |
| 203                 | 1 | 0.250 | 1     | ==> | 0     |
| 235                 | 1 | 0.250 | 1     | ==> | 0     |
| 236                 | 1 | 0.143 | 0     | ==> | 1     |
| 259                 | 1 | 0.125 | 0     | ==> | 1     |

node\_80 --> Anoura geoffroyi peruana 40 3 0.231 3 ==> 0

56 1 0.250 0 ==> 1  
 70 1 0.400 2 ==> 1  
 82 1 0.500 0 ==> 1  
 84 1 0.200 2 ==> 3  
 85 1 0.200 1 ==> 0  
 87 1 0.250 0 ==> 1  
 111 1 0.111 1 ==> 0  
 120 1 0.143 0 --> 1  
 131 1 0.444 1 ==> 0  
 138 1 1.000 1 ==> 0  
 139 1 0.227 1 --> 2  
 144 1 1.000 0 ==> 1  
 150 1 0.200 0 ==> 1  
 173 1 0.286 1 ==> 2  
 176 1 0.400 0 ==> 1  
 186 1 0.158 3 ==> 2  
 193 1 0.200 1 ==> 0  
 202 1 0.182 1 ==> 2  
 206 1 0.286 1 ==> 0  
 210 2 0.200 2 ==> 0  
 219 1 0.125 1 ==> 0  
 244 1 0.333 0 ==> 1  
 253 1 0.278 4 ==> 3  
 263 1 0.222 1 ==> 0  
 267 1 0.154 1 ==> 0  
 278 1 0.091 1 ==> 0

node\_80 --> node\_79 23 1 0.133 0 ==> 1

25 2 0.200 0 --> 2  
 36 1 0.333 1 --> 0  
 58 1 0.167 2 ==> 1  
 97 1 0.125 0 --> 1  
 98 1 0.286 4 --> 1  
 128 1 0.143 0 --> 1  
 133 1 0.500 0 --> 1  
 139 1 0.227 1 --> 0  
 140 1 0.222 0 --> 1  
 142 1 0.500 0 --> 1  
 220 1 0.111 1 --> 0  
 243 1 0.333 0 ==> 1  
 249 1 0.111 1 --> 0  
 272 1 0.500 0 --> 1  
 274 1 0.250 1 --> 0  
 277 1 0.091 1 --> 0

node\_79 --> Phyllonycteris aphylla 5 1 0.273 1 ==> 2

13 1 0.273 1 --> 2  
 29 1 0.214 3 ==> 2  
 31 1 0.286 1 ==> 0  
 34 1 0.158 1 ==> 0  
 37 1 0.200 0 ==> 1  
 47 1 0.200 1 ==> 2

53 1 0.125 0 ==> 1  
 54 1 0.200 1 ==> 0  
 58 1 0.167 1 ==> 0  
 63 2 0.125 2 ==> 0  
 65 1 0.200 0 ==> 1  
 66 1 0.286 1 ==> 0  
 68 1 0.500 0 ==> 1  
 75 1 0.333 0 ==> 1  
 76 1 0.500 0 ==> 1  
 81 2 0.500 1 ==> 3  
 93 1 0.200 0 ==> 1  
 102 1 0.200 2 ==> 1  
 110 1 0.143 2 ==> 1  
 127 2 0.138 2 ==> 0  
 153 1 0.222 1 ==> 2  
 164 1 0.222 1 --> 2  
 170 1 0.333 1 --> 0  
 172 1 0.167 1 ==> 0  
 174 1 0.167 0 ==> 1  
 192 1 0.214 0 ==> 3  
 202 1 0.182 1 ==> 0  
 204 1 0.500 1 ==> 2  
 207 1 0.100 0 ==> 1  
 211 1 0.500 0 ==> 1  
 217 1 0.286 2 ==> 1  
 221 1 0.143 1 ==> 0  
 223 1 0.222 1 ==> 0  
 233 1 0.286 1 ==> 2  
 234 1 0.200 0 ==> 1  
 237 1 0.333 1 ==> 0  
 238 1 0.500 0 ==> 1  
 243 1 0.333 1 ==> 2  
 252 1 0.182 1 ==> 2  
 253 1 0.278 4 --> 2  
 259 1 0.125 1 ==> 2  
 262 2 0.375 0 ==> 2  
 264 1 0.200 1 ==> 2

node\_79 --> *Leptonycteris yerbabuenae* 1

1 0.100 0 --> 1

19 1 0.200 0 ==> 1  
 23 1 0.133 1 ==> 2  
 26 1 0.250 1 ==> 2  
 31 1 0.286 1 ==> 2  
 34 1 0.158 1 ==> 2  
 84 1 0.200 2 --> 0  
 98 1 0.286 1 --> 3  
 110 2 0.143 2 ==> 4  
 114 1 0.250 1 --> 0  
 118 1 0.375 4 ==> 2  
 121 1 0.500 0 ==> 1  
 122 2 0.250 2 ==> 0  
 127 2 0.138 2 ==> 4

|                                             |   |       |   |     |   |
|---------------------------------------------|---|-------|---|-----|---|
| 130                                         | 1 | 0.333 | 0 | ==> | 1 |
| 163                                         | 1 | 0.200 | 0 | ==> | 1 |
| 166                                         | 1 | 1.000 | 0 | ==> | 1 |
| 204                                         | 1 | 0.500 | 1 | ==> | 0 |
| 206                                         | 1 | 0.286 | 1 | ==> | 2 |
| 222                                         | 1 | 0.500 | 0 | ==> | 1 |
| 250                                         | 1 | 0.222 | 1 | ==> | 2 |
| 265                                         | 1 | 0.500 | 0 | ==> | 1 |
| node_81 --> <i>Lonchophylla thomasi</i> 17  |   |       |   |     |   |
| 24                                          | 1 | 0.100 | 1 | --> | 0 |
| 31                                          | 1 | 0.286 | 1 | ==> | 2 |
| 34                                          | 1 | 0.158 | 1 | ==> | 2 |
| 53                                          | 1 | 0.125 | 0 | ==> | 1 |
| 54                                          | 1 | 0.200 | 1 | ==> | 0 |
| 60                                          | 1 | 0.158 | 1 | ==> | 2 |
| 72                                          | 1 | 1.000 | 0 | ==> | 1 |
| 110                                         | 2 | 0.143 | 2 | ==> | 4 |
| 127                                         | 1 | 0.138 | 3 | ==> | 4 |
| 148                                         | 1 | 0.143 | 1 | --> | 2 |
| 183                                         | 1 | 1.000 | 1 | ==> | 0 |
| 187                                         | 1 | 0.158 | 1 | --> | 2 |
| 250                                         | 1 | 0.222 | 1 | ==> | 2 |
| node_83 --> node_82                         |   |       |   |     |   |
| 50                                          | 1 | 0.400 | 1 | --> | 2 |
| 51                                          | 1 | 0.167 | 0 | ==> | 1 |
| 59                                          | 1 | 0.125 | 0 | ==> | 1 |
| 69                                          | 1 | 0.154 | 1 | ==> | 0 |
| 81                                          | 2 | 0.500 | 1 | ==> | 3 |
| 86                                          | 1 | 0.400 | 0 | ==> | 1 |
| 93                                          | 1 | 0.200 | 0 | --> | 1 |
| 98                                          | 1 | 0.286 | 4 | --> | 0 |
| 102                                         | 1 | 0.200 | 2 | --> | 1 |
| 103                                         | 1 | 0.200 | 1 | --> | 0 |
| 112                                         | 1 | 0.125 | 1 | --> | 2 |
| 118                                         | 1 | 0.375 | 4 | --> | 0 |
| 132                                         | 1 | 0.250 | 0 | --> | 1 |
| 146                                         | 1 | 0.250 | 1 | --> | 0 |
| 162                                         | 1 | 0.364 | 2 | --> | 1 |
| 176                                         | 1 | 0.400 | 0 | --> | 1 |
| 186                                         | 1 | 0.158 | 3 | --> | 2 |
| 214                                         | 1 | 0.333 | 3 | --> | 2 |
| 217                                         | 1 | 0.286 | 2 | ==> | 1 |
| 227                                         | 1 | 0.286 | 0 | ==> | 1 |
| 240                                         | 1 | 0.250 | 2 | --> | 1 |
| 250                                         | 1 | 0.222 | 1 | ==> | 0 |
| 271                                         | 1 | 0.200 | 0 | --> | 1 |
| 277                                         | 1 | 0.091 | 1 | --> | 0 |
| node_82 --> <i>Carollia perspicillata</i> 2 |   |       |   |     |   |
| 5                                           | 1 | 0.273 | 2 | --> | 0 |
| 13                                          | 1 | 0.273 | 2 | --> | 3 |
| 17                                          | 1 | 0.200 | 0 | ==> | 1 |
| 31                                          | 1 | 0.286 | 1 | --> | 0 |

|                                                    |   |       |   |     |   |
|----------------------------------------------------|---|-------|---|-----|---|
| 38                                                 | 1 | 0.250 | 0 | ==> | 1 |
| 56                                                 | 1 | 0.250 | 0 | ==> | 1 |
| 57                                                 | 2 | 0.286 | 0 | ==> | 2 |
| 60                                                 | 1 | 0.158 | 1 | --> | 0 |
| 86                                                 | 1 | 0.400 | 1 | ==> | 2 |
| 98                                                 | 1 | 0.286 | 0 | --> | 1 |
| 105                                                | 1 | 0.133 | 1 | ==> | 0 |
| 110                                                | 2 | 0.143 | 2 | ==> | 4 |
| 118                                                | 1 | 0.375 | 0 | --> | 1 |
| 122                                                | 1 | 0.250 | 2 | --> | 3 |
| 127                                                | 1 | 0.138 | 3 | ==> | 4 |
| 142                                                | 1 | 0.500 | 0 | ==> | 1 |
| 148                                                | 1 | 0.143 | 1 | --> | 2 |
| 153                                                | 1 | 0.222 | 1 | ==> | 0 |
| 158                                                | 1 | 0.200 | 0 | ==> | 1 |
| 167                                                | 1 | 0.154 | 0 | --> | 1 |
| 169                                                | 1 | 0.200 | 0 | ==> | 1 |
| 202                                                | 1 | 0.182 | 1 | ==> | 0 |
| 207                                                | 1 | 0.100 | 0 | ==> | 1 |
| 210                                                | 1 | 0.200 | 2 | ==> | 1 |
| 243                                                | 1 | 0.333 | 0 | ==> | 1 |
| 251                                                | 1 | 0.333 | 0 | ==> | 1 |
| 253                                                | 1 | 0.278 | 0 | --> | 2 |
| 254                                                | 1 | 0.182 | 2 | ==> | 1 |
| 262                                                | 2 | 0.375 | 0 | ==> | 2 |
| 276                                                | 1 | 0.500 | 0 | ==> | 1 |
| node_82 --> Artibeus jamaicensis 1 1 0.100 1 ==> 0 |   |       |   |     |   |
| 12                                                 | 1 | 0.455 | 0 | ==> | 1 |
| 16                                                 | 1 | 0.222 | 1 | ==> | 0 |
| 23                                                 | 1 | 0.133 | 0 | ==> | 1 |
| 24                                                 | 1 | 0.100 | 1 | --> | 0 |
| 32                                                 | 1 | 1.000 | 1 | ==> | 2 |
| 47                                                 | 1 | 0.200 | 1 | ==> | 2 |
| 49                                                 | 1 | 0.286 | 2 | --> | 1 |
| 55                                                 | 1 | 0.167 | 1 | --> | 0 |
| 58                                                 | 1 | 0.167 | 2 | ==> | 3 |
| 60                                                 | 1 | 0.158 | 1 | ==> | 2 |
| 64                                                 | 1 | 0.667 | 1 | ==> | 2 |
| 66                                                 | 1 | 0.286 | 1 | ==> | 2 |
| 67                                                 | 1 | 0.143 | 2 | ==> | 1 |
| 75                                                 | 1 | 0.333 | 0 | ==> | 1 |
| 78                                                 | 1 | 0.200 | 1 | ==> | 2 |
| 101                                                | 1 | 0.500 | 0 | ==> | 1 |
| 104                                                | 1 | 1.000 | 0 | ==> | 1 |
| 106                                                | 1 | 0.107 | 1 | ==> | 0 |
| 107                                                | 1 | 0.333 | 1 | ==> | 0 |
| 110                                                | 2 | 0.143 | 2 | ==> | 0 |
| 114                                                | 1 | 0.250 | 0 | ==> | 1 |
| 121                                                | 1 | 0.500 | 0 | ==> | 1 |
| 122                                                | 2 | 0.250 | 2 | ==> | 0 |
| 126                                                | 1 | 0.500 | 1 | ==> | 0 |

|                                  |    |       |         |       |       |
|----------------------------------|----|-------|---------|-------|-------|
| 131                              | 2  | 0.444 | 2       | ==>   | 4     |
| 133                              | 1  | 0.500 | 0       | ==>   | 1     |
| 145                              | 1  | 0.667 | 0       | ==>   | 2     |
| 151                              | 1  | 0.400 | 0       | ==>   | 1     |
| 162                              | 1  | 0.364 | 1       | -->   | 3     |
| 165                              | 1  | 0.125 | 1       | ==>   | 0     |
| 174                              | 1  | 0.167 | 0       | ==>   | 1     |
| 192                              | 1  | 0.214 | 3       | ==>   | 1     |
| 193                              | 1  | 0.200 | 1       | ==>   | 0     |
| 195                              | 1  | 0.182 | 2       | ==>   | 1     |
| 221                              | 1  | 0.143 | 1       | ==>   | 0     |
| 223                              | 1  | 0.222 | 1       | ==>   | 0     |
| 233                              | 1  | 0.286 | 1       | ==>   | 2     |
| 235                              | 1  | 0.250 | 1       | ==>   | 0     |
| 237                              | 1  | 0.333 | 1       | ==>   | 0     |
| 238                              | 1  | 0.500 | 0       | ==>   | 1     |
| 244                              | 1  | 0.333 | 0       | ==>   | 1     |
| 252                              | 1  | 0.182 | 1       | ==>   | 2     |
| 255                              | 1  | 0.200 | 0       | -->   | 1     |
| 259                              | 1  | 0.125 | 0       | ==>   | 1     |
| 263                              | 1  | 0.222 | 1       | ==>   | 2     |
| 264                              | 1  | 0.200 | 1       | ==>   | 2     |
| 266                              | 1  | 0.500 | 0       | ==>   | 1     |
| 267                              | 1  | 0.154 | 1       | ==>   | 2     |
| 268                              | 1  | 0.500 | 0       | ==>   | 1     |
| 271                              | 1  | 0.200 | 1       | ==>   | 2     |
| 272                              | 1  | 0.500 | 0       | ==>   | 1     |
| 274                              | 1  | 0.250 | 1       | ==>   | 0     |
| node_70 --> node_49              | 1  |       | 1 0.100 | 1 --> | 0     |
| 5                                | 1  | 0.273 | 1       | -->   | 2     |
| 16                               | 1  | 0.222 | 0       | -->   | 1     |
| 24                               | 1  | 0.100 | 0       | -->   | 1     |
| 74                               | 1  | 0.200 | 0       | -->   | 1     |
| 116                              | 1  | 0.167 | 0       | ==>   | 1     |
| 120                              | 1  | 0.143 | 1       | -->   | 2     |
| 122                              | 1  | 0.250 | 3       | -->   | 2     |
| 127                              | 1  | 0.138 | 1       | -->   | 0     |
| 135                              | 1  | 0.200 | 0       | ==>   | 1     |
| 160                              | 1  | 0.111 | 0       | ==>   | 1     |
| 165                              | 1  | 0.125 | 1       | -->   | 2     |
| 190                              | 1  | 0.167 | 0       | -->   | 1     |
| 195                              | 1  | 0.182 | 0       | -->   | 1     |
| 208                              | 1  | 0.250 | 0       | -->   | 1     |
| 210                              | 1  | 0.200 | 2       | -->   | 1     |
| 245                              | 1  | 0.222 | 0       | -->   | 1     |
| 250                              | 1  | 0.222 | 1       | ==>   | 0     |
| 275                              | 1  | 0.333 | 1       | -->   | 2     |
| 278                              | 1  | 0.091 | 1       | -->   | 0     |
| node_49 --> Mormoops blainvillei | 11 |       | 1 0.250 | 1     | ==> 0 |
| 21                               | 1  | 0.125 | 0       | ==>   | 1     |
| 23                               | 1  | 0.133 | 1       | ==>   | 2     |

|                                 |       |       |     |     |   |
|---------------------------------|-------|-------|-----|-----|---|
| 34                              | 1     | 0.158 | 0   | ==> | 1 |
| 47                              | 1     | 0.200 | 1   | ==> | 0 |
| 55                              | 1     | 0.167 | 0   | ==> | 1 |
| 58                              | 1     | 0.167 | 2   | ==> | 3 |
| 59                              | 1     | 0.125 | 0   | --> | 1 |
| 70                              | 1     | 0.400 | 2   | ==> | 1 |
| 100                             | 1     | 0.333 | 0   | ==> | 3 |
| 106                             | 1     | 0.107 | 2   | --> | 1 |
| 111                             | 1     | 0.111 | 1   | --> | 0 |
| 112                             | 1     | 0.125 | 1   | ==> | 0 |
| 124                             | 1     | 0.333 | 0   | ==> | 1 |
| 129                             | 1     | 0.154 | 1   | ==> | 0 |
| 158                             | 1     | 0.200 | 0   | --> | 1 |
| 173                             | 1     | 0.286 | 0   | --> | 1 |
| 182                             | 1     | 0.200 | 0   | ==> | 1 |
| 187                             | 1     | 0.158 | 2   | --> | 1 |
| 232                             | 1     | 0.200 | 1   | ==> | 0 |
| 247                             | 1     | 0.200 | 1   | ==> | 0 |
| 253                             | 1     | 0.278 | 1   | ==> | 2 |
| 269                             | 1     | 0.222 | 0   | ==> | 1 |
| 279                             | 1     | 0.500 | 1   | ==> | 0 |
| 280                             | 1     | 0.125 | 2   | ==> | 1 |
| node_49 --> node_48             |       |       |     |     |   |
| 18                              | 1     | 0.167 | 0   | --> | 1 |
| 26                              | 1     | 0.250 | 0   | ==> | 1 |
| 63                              | 1     | 0.125 | 0   | ==> | 1 |
| 67                              | 1     | 0.143 | 2   | --> | 1 |
| 96                              | 1     | 0.333 | 0   | ==> | 1 |
| 102                             | 1     | 0.200 | 2   | ==> | 1 |
| 103                             | 1     | 0.200 | 1   | ==> | 0 |
| 106                             | 1     | 0.107 | 2   | ==> | 3 |
| 112                             | 1     | 0.125 | 1   | ==> | 2 |
| 118                             | 1     | 0.375 | 4   | ==> | 2 |
| 129                             | 1     | 0.154 | 1   | ==> | 2 |
| 148                             | 2     | 0.143 | 2   | ==> | 0 |
| 153                             | 1     | 0.222 | 1   | ==> | 0 |
| 175                             | 1     | 0.143 | 1   | ==> | 2 |
| 179                             | 1     | 0.333 | 1   | ==> | 2 |
| 184                             | 1     | 0.143 | 0   | --> | 1 |
| 186                             | 1     | 0.158 | 3   | ==> | 4 |
| 187                             | 1     | 0.158 | 2   | ==> | 3 |
| 188                             | 1     | 0.250 | 0   | ==> | 1 |
| 194                             | 1     | 0.143 | 2   | ==> | 1 |
| 217                             | 1     | 0.286 | 2   | ==> | 1 |
| 221                             | 1     | 0.143 | 1   | ==> | 0 |
| 226                             | 1     | 0.111 | 0   | ==> | 1 |
| 236                             | 1     | 0.143 | 0   | --> | 1 |
| node_48 --> Pteronotus davyi 53 |       |       |     |     |   |
| 1                               | 0.125 | 0     | ==> | 1   |   |
| 67                              | 1     | 0.143 | 1   | ==> | 0 |
| 110                             | 1     | 0.143 | 1   | ==> | 0 |
| 139                             | 1     | 0.227 | 1   | ==> | 0 |
| 195                             | 1     | 0.182 | 1   | --> | 0 |

|                                     |   |       |   |                 |
|-------------------------------------|---|-------|---|-----------------|
| 208                                 | 1 | 0.250 | 1 | --> 0           |
| 220                                 | 1 | 0.111 | 1 | ==> 0           |
| 236                                 | 1 | 0.143 | 1 | --> 2           |
| 254                                 | 1 | 0.182 | 2 | ==> 1           |
| 270                                 | 1 | 0.333 | 0 | ==> 1           |
| 278                                 | 1 | 0.091 | 0 | --> 1           |
| node_48 --> Pteronotus parnellii 16 |   |       |   | 1 0.222 1 --> 0 |
| 19                                  | 1 | 0.200 | 0 | ==> 1           |
| 23                                  | 1 | 0.133 | 1 | ==> 0           |
| 69                                  | 1 | 0.154 | 0 | --> 1           |
| 77                                  | 1 | 0.200 | 0 | ==> 1           |
| 97                                  | 1 | 0.125 | 1 | --> 0           |
| 98                                  | 1 | 0.286 | 4 | ==> 2           |
| 122                                 | 1 | 0.250 | 2 | --> 3           |
| 127                                 | 1 | 0.138 | 0 | --> 1           |
| 132                                 | 1 | 0.250 | 0 | ==> 1           |
| 152                                 | 1 | 0.333 | 1 | ==> 0           |
| 161                                 | 1 | 0.167 | 0 | ==> 1           |
| 165                                 | 2 | 0.125 | 2 | ==> 0           |
| 177                                 | 1 | 0.500 | 0 | ==> 1           |
| 190                                 | 1 | 0.167 | 1 | --> 0           |
| 192                                 | 1 | 0.214 | 3 | ==> 1           |
| 194                                 | 1 | 0.143 | 1 | ==> 0           |
| 206                                 | 1 | 0.286 | 2 | ==> 1           |
| 210                                 | 1 | 0.200 | 1 | --> 2           |
| 215                                 | 1 | 0.143 | 0 | ==> 1           |
| 245                                 | 1 | 0.222 | 1 | --> 0           |
| 259                                 | 1 | 0.125 | 0 | ==> 1           |
| 260                                 | 1 | 0.250 | 1 | ==> 0           |
| 267                                 | 1 | 0.154 | 0 | --> 1           |
| 271                                 | 1 | 0.200 | 1 | ==> 0           |
| 274                                 | 1 | 0.250 | 2 | ==> 1           |
| node_69 --> node_54 35              |   |       |   | 1 0.500 0 --> 1 |
| 58                                  | 1 | 0.167 | 2 | --> 3           |
| 83                                  | 1 | 0.200 | 0 | ==> 1           |
| 84                                  | 1 | 0.200 | 0 | --> 2           |
| 96                                  | 1 | 0.333 | 0 | --> 1           |
| 100                                 | 1 | 0.333 | 0 | --> 3           |
| 103                                 | 1 | 0.200 | 1 | ==> 0           |
| 129                                 | 1 | 0.154 | 1 | ==> 2           |
| 155                                 | 1 | 0.200 | 1 | --> 0           |
| 163                                 | 1 | 0.200 | 0 | --> 1           |
| 165                                 | 1 | 0.125 | 1 | --> 0           |
| 172                                 | 1 | 0.167 | 0 | ==> 1           |
| 186                                 | 1 | 0.158 | 3 | ==> 2           |
| 192                                 | 1 | 0.214 | 3 | --> 2           |
| 224                                 | 1 | 1.000 | 0 | --> 1           |
| 226                                 | 1 | 0.111 | 0 | --> 1           |
| 259                                 | 1 | 0.125 | 0 | --> 1           |
| node_54 --> node_52 23              |   |       |   | 1 0.133 1 --> 2 |
| 29                                  | 1 | 0.214 | 1 | --> 0           |

|                     |    |       |       |     |       |
|---------------------|----|-------|-------|-----|-------|
| 105                 | 1  | 0.133 | 1     | --> | 0     |
| 112                 | 1  | 0.125 | 1     | --> | 2     |
| 120                 | 1  | 0.143 | 1     | --> | 0     |
| 122                 | 1  | 0.250 | 3     | --> | 2     |
| 123                 | 1  | 0.167 | 1     | --> | 0     |
| 175                 | 1  | 0.143 | 1     | --> | 2     |
| 184                 | 1  | 0.143 | 0     | --> | 1     |
| 196                 | 1  | 0.200 | 1     | --> | 0     |
| 205                 | 1  | 1.000 | 0     | --> | 1     |
| 221                 | 1  | 0.143 | 1     | --> | 0     |
| 245                 | 1  | 0.222 | 0     | ==> | 1     |
| 253                 | 1  | 0.278 | 1     | --> | 0     |
| 267                 | 1  | 0.154 | 0     | --> | 1     |
| 269                 | 1  | 0.222 | 0     | ==> | 1     |
| 277                 | 1  | 0.091 | 1     | --> | 0     |
| node_52 --> node_50 | 13 | 1     | 0.273 | 2   | ==> 3 |
| 24                  | 1  | 0.100 | 0     | --> | 1     |
| 46                  | 1  | 0.250 | 0     | ==> | 1     |
| 67                  | 1  | 0.143 | 1     | ==> | 0     |
| 78                  | 1  | 0.200 | 1     | ==> | 0     |
| 85                  | 1  | 0.200 | 1     | ==> | 0     |
| 96                  | 1  | 0.333 | 1     | --> | 0     |
| 100                 | 1  | 0.333 | 3     | --> | 0     |
| 108                 | 1  | 0.333 | 0     | ==> | 1     |
| 110                 | 1  | 0.143 | 2     | ==> | 1     |
| 124                 | 1  | 0.333 | 0     | ==> | 1     |
| 127                 | 1  | 0.138 | 2     | ==> | 1     |
| 139                 | 1  | 0.227 | 1     | ==> | 2     |
| 145                 | 1  | 0.667 | 0     | ==> | 1     |
| 148                 | 1  | 0.143 | 2     | ==> | 1     |
| 150                 | 1  | 0.200 | 0     | ==> | 1     |
| 155                 | 1  | 0.200 | 0     | --> | 1     |
| 158                 | 1  | 0.200 | 1     | ==> | 0     |
| 160                 | 1  | 0.111 | 0     | ==> | 1     |
| 161                 | 1  | 0.167 | 0     | ==> | 1     |
| 163                 | 1  | 0.200 | 1     | --> | 0     |
| 174                 | 1  | 0.167 | 0     | ==> | 1     |
| 189                 | 1  | 1.000 | 1     | ==> | 0     |
| 192                 | 1  | 0.214 | 2     | --> | 1     |
| 193                 | 1  | 0.200 | 1     | ==> | 0     |
| 195                 | 1  | 0.182 | 0     | ==> | 1     |
| 198                 | 1  | 0.333 | 0     | ==> | 1     |
| 202                 | 1  | 0.182 | 1     | --> | 0     |
| 207                 | 1  | 0.100 | 0     | --> | 1     |
| 217                 | 1  | 0.286 | 2     | ==> | 1     |
| 220                 | 1  | 0.111 | 1     | --> | 0     |
| 222                 | 1  | 0.500 | 0     | ==> | 1     |
| 223                 | 1  | 0.222 | 1     | ==> | 2     |
| 226                 | 1  | 0.111 | 1     | --> | 0     |
| 231                 | 1  | 0.333 | 0     | ==> | 1     |
| 242                 | 1  | 0.333 | 2     | --> | 1     |

|                                                          |   |       |       |   |
|----------------------------------------------------------|---|-------|-------|---|
| 250                                                      | 1 | 0.222 | 1 ==> | 0 |
| 261                                                      | 1 | 1.000 | 0 ==> | 1 |
| 271                                                      | 1 | 0.200 | 1 ==> | 0 |
| node_50 --> Noctilio albiventris 62      1 0.667 0 ==> 1 |   |       |       |   |
| 90                                                       | 1 | 0.500 | 1 ==> | 0 |
| 107                                                      | 1 | 0.333 | 1 ==> | 0 |
| 111                                                      | 1 | 0.111 | 0 ==> | 1 |
| 122                                                      | 1 | 0.250 | 2 --> | 3 |
| 126                                                      | 1 | 0.500 | 1 ==> | 0 |
| 128                                                      | 1 | 0.143 | 0 ==> | 1 |
| 197                                                      | 1 | 0.333 | 0 ==> | 1 |
| 219                                                      | 1 | 0.125 | 0 ==> | 1 |
| 236                                                      | 1 | 0.143 | 0 ==> | 2 |
| 247                                                      | 1 | 0.200 | 1 ==> | 0 |
| 259                                                      | 1 | 0.125 | 1 ==> | 2 |
| node_50 --> Noctilio leporinus 109      1 0.500 0 ==> 1  |   |       |       |   |
| 110                                                      | 1 | 0.143 | 1 ==> | 0 |
| 125                                                      | 1 | 0.500 | 0 ==> | 1 |
| node_52 --> node_51      1      1 0.100 1 --> 0          |   |       |       |   |
| 2                                                        | 1 | 0.167 | 0 ==> | 1 |
| 9                                                        | 1 | 0.250 | 1 --> | 0 |
| 13                                                       | 1 | 0.273 | 2 ==> | 1 |
| 21                                                       | 1 | 0.125 | 0 ==> | 1 |
| 58                                                       | 1 | 0.167 | 3 --> | 2 |
| 59                                                       | 1 | 0.125 | 1 ==> | 0 |
| 61                                                       | 1 | 0.154 | 1 ==> | 0 |
| 65                                                       | 1 | 0.200 | 1 ==> | 0 |
| 67                                                       | 1 | 0.143 | 1 --> | 2 |
| 92                                                       | 1 | 0.250 | 0 ==> | 1 |
| 110                                                      | 2 | 0.143 | 2 ==> | 4 |
| 116                                                      | 1 | 0.167 | 0 ==> | 1 |
| 127                                                      | 2 | 0.138 | 2 ==> | 4 |
| 158                                                      | 1 | 0.200 | 1 ==> | 2 |
| 162                                                      | 1 | 0.364 | 2 ==> | 0 |
| 164                                                      | 1 | 0.222 | 2 ==> | 1 |
| 215                                                      | 1 | 0.143 | 1 ==> | 0 |
| 240                                                      | 1 | 0.250 | 2 ==> | 1 |
| 264                                                      | 1 | 0.200 | 0 ==> | 1 |
| 274                                                      | 1 | 0.250 | 2 ==> | 1 |
| 278                                                      | 1 | 0.091 | 1 --> | 0 |
| node_51 --> Furipterus horrens 34      3 0.158 0 ==> 3   |   |       |       |   |
| 55                                                       | 1 | 0.167 | 0 ==> | 1 |
| 60                                                       | 1 | 0.158 | 1 --> | 2 |
| 63                                                       | 2 | 0.125 | 0 ==> | 2 |
| 69                                                       | 1 | 0.154 | 1 ==> | 2 |
| 74                                                       | 1 | 0.200 | 0 --> | 1 |
| 77                                                       | 1 | 0.200 | 0 ==> | 1 |
| 100                                                      | 1 | 0.333 | 3 --> | 1 |
| 105                                                      | 1 | 0.133 | 0 --> | 1 |
| 106                                                      | 1 | 0.107 | 1 ==> | 0 |
| 123                                                      | 1 | 0.167 | 0 --> | 1 |

|                                        |   |       |            |
|----------------------------------------|---|-------|------------|
| 131                                    | 1 | 0.444 | 1 ==> 0    |
| 135                                    | 1 | 0.200 | 0 ==> 1    |
| 143                                    | 1 | 0.200 | 0 ==> 1    |
| 172                                    | 1 | 0.167 | 1 ==> 0    |
| 192                                    | 1 | 0.214 | 2 --> 0    |
| 196                                    | 1 | 0.200 | 0 --> 1    |
| 227                                    | 1 | 0.286 | 0 ==> 1    |
| 232                                    | 1 | 0.200 | 1 ==> 0    |
| 236                                    | 1 | 0.143 | 0 ==> 1    |
| 252                                    | 1 | 0.182 | 0 ==> 1    |
| 267                                    | 1 | 0.154 | 1 --> 0    |
| 277                                    | 1 | 0.091 | 0 --> 1    |
| 280                                    | 1 | 0.125 | 2 ==> 1    |
| node_51 --> Amorphochilus schnablii 23 |   |       |            |
| 69                                     | 1 | 0.154 | 1 ==> 0    |
| 83                                     | 1 | 0.200 | 1 ==> 0    |
| 103                                    | 1 | 0.200 | 0 ==> 1    |
| 120                                    | 1 | 0.143 | 0 --> 1    |
| 156                                    | 1 | 0.500 | 2 --> 1    |
| 186                                    | 1 | 0.158 | 2 ==> 1    |
| 187                                    | 1 | 0.158 | 2 --> 1    |
| 253                                    | 1 | 0.278 | 0 --> 1    |
| 259                                    | 1 | 0.125 | 1 --> 0    |
| 279                                    | 1 | 0.500 | 1 ==> 0    |
| node_54 --> node_53                    |   |       |            |
| 25                                     | 1 | 0.200 | 2 ==> 3    |
| 40                                     | 3 | 0.231 | 3 ==> 0    |
| 51                                     | 1 | 0.167 | 0 ==> 1    |
| 60                                     | 1 | 0.158 | 1 --> 2    |
| 63                                     | 1 | 0.125 | 0 ==> 1    |
| 74                                     | 1 | 0.200 | 0 --> 1    |
| 91                                     | 1 | 1.000 | 1 ==> 0    |
| 105                                    | 1 | 0.133 | 1 ==> 2    |
| 108                                    | 1 | 0.333 | 0 ==> 2    |
| 120                                    | 1 | 0.143 | 1 ==> 2    |
| 124                                    | 1 | 0.333 | 0 ==> 2    |
| 154                                    | 1 | 0.143 | 0 ==> 1    |
| 162                                    | 1 | 0.364 | 2 ==> 1    |
| 210                                    | 1 | 0.200 | 2 ==> 1    |
| 221                                    | 1 | 0.143 | 1 ==> 2    |
| 232                                    | 1 | 0.200 | 1 ==> 0    |
| 249                                    | 1 | 0.111 | 0 ==> 1    |
| 252                                    | 1 | 0.182 | 0 ==> 1    |
| 260                                    | 1 | 0.250 | 1 --> 0    |
| 275                                    | 1 | 0.333 | 1 --> 0    |
| node_53 --> Thyroptera discifera 56    |   |       |            |
| 57                                     | 1 | 0.286 | 0 ==> 1    |
| 67                                     | 1 | 0.143 | 1 --> {02} |
| 100                                    | 1 | 0.333 | 3 --> 2    |
| 106                                    | 2 | 0.107 | 1 ==> 3    |
| 110                                    | 1 | 0.143 | 2 ==> 3    |
| 116                                    | 1 | 0.167 | 0 ==> 1    |

|                                   |   |       |   |     |                   |
|-----------------------------------|---|-------|---|-----|-------------------|
| 123                               | 1 | 0.167 | 1 | ==> | 2                 |
| 127                               | 1 | 0.138 | 2 | ==> | 3                 |
| 165                               | 1 | 0.125 | 0 | --> | 1                 |
| 178                               | 1 | 0.250 | 0 | ==> | 1                 |
| 180                               | 1 | 0.500 | 0 | ==> | 1                 |
| 186                               | 1 | 0.158 | 2 | ==> | 1                 |
| 190                               | 1 | 0.167 | 0 | ==> | 1                 |
| 202                               | 1 | 0.182 | 1 | --> | 0                 |
| 204                               | 1 | 0.500 | 1 | ==> | 2                 |
| 214                               | 3 | 0.333 | 3 | ==> | 0                 |
| 220                               | 1 | 0.111 | 1 | ==> | 2                 |
| 250                               | 1 | 0.222 | 1 | ==> | 2                 |
| 259                               | 1 | 0.125 | 1 | --> | 0                 |
| node_53 --> Thyroptera tricolor 8 |   |       |   |     | 1 0.500 0 ==> 1   |
| 21                                | 1 | 0.125 | 0 | ==> | 1                 |
| 33                                | 1 | 0.500 | 1 | ==> | 0                 |
| 69                                | 1 | 0.154 | 1 | ==> | 0                 |
| 106                               | 1 | 0.107 | 1 | ==> | 0                 |
| 117                               | 1 | 0.167 | 1 | ==> | 0                 |
| 139                               | 1 | 0.227 | 1 | ==> | 0                 |
| 160                               | 1 | 0.111 | 0 | ==> | 1                 |
| 192                               | 1 | 0.214 | 2 | --> | 3                 |
| 207                               | 1 | 0.100 | 0 | --> | 1                 |
| 220                               | 1 | 0.111 | 1 | --> | 0                 |
| 233                               | 1 | 0.286 | 1 | ==> | 0                 |
| 236                               | 1 | 0.143 | 0 | ==> | 2                 |
| 240                               | 1 | 0.250 | 2 | ==> | 1                 |
| 254                               | 2 | 0.182 | 2 | ==> | 0                 |
| 255                               | 1 | 0.200 | 1 | ==> | 0                 |
| 262                               | 1 | 0.375 | 0 | ==> | 1                 |
| 280                               | 1 | 0.125 | 2 | ==> | 1                 |
| node_68 --> node_58               |   |       |   |     | 9 1 0.250 1 --> 0 |
| 15                                | 1 | 0.250 | 0 | --> | 1                 |
| 25                                | 1 | 0.200 | 2 | --> | 3                 |
| 51                                | 1 | 0.167 | 0 | --> | 1                 |
| 53                                | 1 | 0.125 | 0 | --> | 1                 |
| 57                                | 1 | 0.286 | 0 | --> | 1                 |
| 71                                | 1 | 0.111 | 2 | ==> | 1                 |
| 92                                | 1 | 0.250 | 0 | ==> | 1                 |
| 109                               | 1 | 0.500 | 0 | --> | 1                 |
| 112                               | 1 | 0.125 | 1 | --> | 0                 |
| 120                               | 1 | 0.143 | 1 | --> | 0                 |
| 125                               | 1 | 0.500 | 0 | --> | 1                 |
| 129                               | 1 | 0.154 | 1 | --> | 0                 |
| 148                               | 2 | 0.143 | 2 | --> | 0                 |
| 150                               | 1 | 0.200 | 0 | ==> | 1                 |
| 161                               | 1 | 0.167 | 0 | ==> | 1                 |
| 169                               | 1 | 0.200 | 0 | ==> | 1                 |
| 175                               | 1 | 0.143 | 1 | ==> | 2                 |
| 187                               | 2 | 0.158 | 2 | --> | 0                 |
| 197                               | 1 | 0.333 | 0 | --> | 1                 |

|                                |    |       |       |     |     |   |
|--------------------------------|----|-------|-------|-----|-----|---|
| 198                            | 1  | 0.333 | 0     | --> | 1   |   |
| 207                            | 1  | 0.100 | 0     | --> | 1   |   |
| 242                            | 1  | 0.333 | 2     | --> | 1   |   |
| 252                            | 1  | 0.182 | 0     | ==> | 1   |   |
| 253                            | 1  | 0.278 | 1     | --> | 0   |   |
| 271                            | 1  | 0.200 | 1     | ==> | 0   |   |
| node_58 --> node_56            | 97 | 1     | 0.125 | 1   | --> | 0 |
| 227                            | 1  | 0.286 | 0     | ==> | 1   |   |
| 253                            | 1  | 0.278 | 0     | --> | 2   |   |
| 260                            | 1  | 0.250 | 1     | --> | 0   |   |
| node_56 --> node_55            | 69 | 1     | 0.154 | 1   | ==> | 0 |
| 98                             | 1  | 0.286 | 4     | ==> | 3   |   |
| 103                            | 1  | 0.200 | 1     | ==> | 0   |   |
| 117                            | 1  | 0.167 | 1     | --> | 0   |   |
| 236                            | 1  | 0.143 | 0     | --> | 1   |   |
| 249                            | 1  | 0.111 | 0     | --> | 1   |   |
| 259                            | 1  | 0.125 | 0     | --> | 1   |   |
| 264                            | 1  | 0.200 | 0     | ==> | 1   |   |
| 267                            | 1  | 0.154 | 0     | --> | 1   |   |
| 274                            | 1  | 0.250 | 2     | ==> | 1   |   |
| node_55 --> Vulcanops worthyae | 77 | 1     | 0.200 | 0   | ==> | 1 |
| 94                             | 1  | 0.250 | 1     | ==> | 0   |   |
| 103                            | 1  | 0.200 | 0     | ==> | 1   |   |
| 108                            | 1  | 0.333 | 0     | ==> | 3   |   |
| 110                            | 1  | 0.143 | 2     | ==> | 1   |   |
| 112                            | 2  | 0.125 | 0     | ==> | 2   |   |
| 115                            | 1  | 0.333 | 1     | ==> | 0   |   |
| 124                            | 1  | 0.333 | 0     | ==> | 3   |   |
| 127                            | 1  | 0.138 | 2     | ==> | 1   |   |
| 129                            | 2  | 0.154 | 0     | ==> | 2   |   |
| 134                            | 1  | 0.200 | 1     | ==> | 0   |   |
| 139                            | 1  | 0.227 | 1     | ==> | 0   |   |
| 143                            | 1  | 0.200 | 0     | ==> | 1   |   |
| 213                            | 1  | 1.000 | 1     | ==> | 0   |   |
| 214                            | 1  | 0.333 | 3     | ==> | 2   |   |
| 219                            | 1  | 0.125 | 0     | ==> | 1   |   |
| 220                            | 1  | 0.111 | 1     | --> | 0   |   |
| 221                            | 1  | 0.143 | 1     | ==> | 2   |   |
| 223                            | 1  | 0.222 | 1     | ==> | 0   |   |
| 226                            | 1  | 0.111 | 0     | ==> | 1   |   |
| 236                            | 1  | 0.143 | 1     | --> | 0   |   |
| 242                            | 1  | 0.333 | 1     | --> | 2   |   |
| 245                            | 1  | 0.222 | 0     | ==> | 1   |   |
| 254                            | 1  | 0.182 | 2     | ==> | 1   |   |
| 259                            | 1  | 0.125 | 1     | --> | 0   |   |
| node_55 --> Mystacina robusta  | 34 | 1     | 0.158 | 1   | ==> | 2 |
| 56                             | 1  | 0.250 | 0     | ==> | 1   |   |
| 71                             | 1  | 0.111 | 1     | ==> | 2   |   |
| 98                             | 1  | 0.286 | 3     | ==> | 4   |   |
| 194                            | 1  | 0.143 | 2     | ==> | 1   |   |
| 249                            | 1  | 0.111 | 1     | --> | 0   |   |

253        1 0.278 2 ==> 1  
 node\_55 --> *Mystacina tuberculata* 23        1 0.133 1 ==> 0  
     49        1 0.286 0 ==> 1  
     61        1 0.154 0 --> 1  
     71        1 0.111 1 ==> 2  
     94        1 0.250 1 ==> 0  
    127        1 0.138 2 ==> 3  
    165        1 0.125 1 ==> 2  
    167        1 0.154 2 ==> 1  
    200        1 0.500 1 --> 0  
    210        1 0.200 2 ==> 1  
    235        1 0.250 1 ==> 0  
 node\_55 --> *Mystacina miocenalis* 74        1 0.200 0 ==> 1  
     90        1 0.500 1 ==> 0  
    122        1 0.250 3 ==> 2  
    127        1 0.138 2 ==> 3  
 node\_56 --> *Icarops paradox* 63        1 0.125 0 ==> 1  
     67        1 0.143 1 ==> 0  
     78        1 0.200 1 ==> 2  
    116        1 0.167 0 ==> 1  
    241        1 0.250 0 ==> 1  
    277        1 0.091 1 ==> 0  
    280        1 0.125 2 ==> 1  
 node\_58 --> node\_57    110        1 0.143 2 --> 1  
     219        1 0.125 0 ==> 1  
     220        1 0.111 1 --> 0  
 node\_57 --> *Icarops aenae* 269        1 0.222 0 ==> 1  
     280        1 0.125 2 ==> 1  
 node\_67 --> node\_66    7        1 1.000 0 --> 1  
     58        1 0.167 2 --> 3  
    110        1 0.143 2 --> 3  
    122        1 0.250 3 --> 2  
    127        1 0.138 2 --> 3  
    141        1 0.500 0 --> 1  
    162        1 0.364 2 --> 3  
    240        1 0.250 2 ==> 1  
 node\_66 --> *Natalus stramineus* 5        1 0.273 0 ==> 2  
     13        1 0.273 2 --> 1  
     21        1 0.125 0 --> 1  
     23        1 0.133 1 ==> 0  
     25        1 0.200 2 ==> 1  
     34        1 0.158 1 ==> 0  
     40        3 0.231 3 ==> 0  
     47        1 0.200 1 ==> 0  
     56        1 0.250 0 ==> 1  
     60        2 0.158 2 ==> 0  
     62        2 0.667 0 ==> 2  
     65        1 0.200 1 ==> 0  
     67        1 0.143 1 --> 2  
     69        1 0.154 1 ==> 0  
     85        1 0.200 1 ==> 0

|                                  |    |       |       |     |          |
|----------------------------------|----|-------|-------|-----|----------|
| 92                               | 1  | 0.250 | 0     | ==> | 1        |
| 98                               | 1  | 0.286 | 4     | ==> | 3        |
| 105                              | 1  | 0.133 | 1     | ==> | 2        |
| 108                              | 1  | 0.333 | 0     | ==> | 2        |
| 112                              | 1  | 0.125 | 1     | --> | 0        |
| 116                              | 1  | 0.167 | 0     | ==> | 1        |
| 120                              | 1  | 0.143 | 1     | --> | 0        |
| 127                              | 1  | 0.138 | 3     | ==> | 4        |
| 131                              | 1  | 0.444 | 1     | ==> | 0        |
| 135                              | 1  | 0.200 | 0     | ==> | 1        |
| 139                              | 1  | 0.227 | 1     | ==> | 0        |
| 160                              | 1  | 0.111 | 0     | ==> | 1        |
| 165                              | 1  | 0.125 | 1     | ==> | 0        |
| 184                              | 1  | 0.143 | 1     | ==> | 0        |
| 186                              | 2  | 0.158 | 3     | ==> | 1        |
| 187                              | 2  | 0.158 | 2     | --> | 0        |
| 192                              | 1  | 0.214 | 3     | ==> | 2        |
| 207                              | 1  | 0.100 | 0     | --> | 1        |
| 236                              | 1  | 0.143 | 0     | ==> | 2        |
| 245                              | 1  | 0.222 | 0     | ==> | 1        |
| 252                              | 1  | 0.182 | 0     | ==> | 1        |
| 259                              | 2  | 0.125 | 0     | ==> | 2        |
| 264                              | 1  | 0.200 | 0     | ==> | 1        |
| 273                              | 1  | 1.000 | 0     | ==> | 1        |
| 280                              | 1  | 0.125 | 2     | ==> | 1        |
| node_66 --> node_65              | 2  | 1     | 0.167 | 0   | ==> 1    |
| 13                               | 1  | 0.273 | 2     | --> | 3        |
| 16                               | 1  | 0.222 | 1     | --> | 2        |
| 47                               | 1  | 0.200 | 1     | ==> | 2        |
| 51                               | 1  | 0.167 | 0     | --> | 1        |
| 67                               | 1  | 0.143 | 1     | ==> | 0        |
| 71                               | 1  | 0.111 | 2     | ==> | 1        |
| 77                               | 1  | 0.200 | 0     | ==> | 1        |
| 78                               | 1  | 0.200 | 1     | --> | 0        |
| 97                               | 1  | 0.125 | 1     | --> | 0        |
| 136                              | 1  | 0.500 | 1     | ==> | 0        |
| 154                              | 1  | 0.143 | 0     | ==> | 1        |
| 158                              | 1  | 0.200 | 1     | ==> | 0        |
| 163                              | 1  | 0.200 | 0     | ==> | 1        |
| 164                              | 1  | 0.222 | 1     | ==> | 2        |
| 167                              | 1  | 0.154 | 2     | --> | 1        |
| 169                              | 1  | 0.200 | 0     | ==> | 1        |
| 176                              | 2  | 0.400 | 0     | --> | 2        |
| 182                              | 1  | 0.200 | 0     | --> | 1        |
| 242                              | 1  | 0.333 | 2     | --> | 1        |
| 254                              | 2  | 0.182 | 2     | ==> | 0        |
| 267                              | 1  | 0.154 | 0     | --> | 1        |
| 271                              | 1  | 0.200 | 1     | ==> | 0        |
| 275                              | 1  | 0.333 | 2     | --> | 1        |
| node_65 --> Chalinolobus gouldii | 12 | 2     | 0.455 | 1   | ==> {34} |
| 24                               | 1  | 0.100 | 1     | ==> | 0        |

|                                    |   |       |       |   |
|------------------------------------|---|-------|-------|---|
| 48                                 | 2 | 1.000 | 0 ==> | 2 |
| 100                                | 1 | 0.333 | 0 ==> | 3 |
| 120                                | 1 | 0.143 | 1 ==> | 2 |
| 122                                | 1 | 0.250 | 2 --> | 3 |
| 140                                | 1 | 0.222 | 0 ==> | 1 |
| 162                                | 1 | 0.364 | 3 --> | 2 |
| 175                                | 1 | 0.143 | 1 ==> | 2 |
| 186                                | 1 | 0.158 | 3 ==> | 4 |
| 187                                | 1 | 0.158 | 2 ==> | 3 |
| 188                                | 1 | 0.250 | 0 ==> | 1 |
| 192                                | 1 | 0.214 | 3 --> | 1 |
| 202                                | 1 | 0.182 | 0 ==> | 1 |
| 210                                | 1 | 0.200 | 2 ==> | 3 |
| 219                                | 1 | 0.125 | 0 ==> | 1 |
| 227                                | 1 | 0.286 | 0 ==> | 1 |
| 270                                | 1 | 0.333 | 0 ==> | 1 |
| node_65 --> Chaerephon jobensis 15 |   |       |       |   |
|                                    | 1 | 0.250 | 0 ==> | 1 |
| 26                                 | 1 | 0.250 | 0 ==> | 1 |
| 29                                 | 1 | 0.214 | 0 --> | 1 |
| 37                                 | 1 | 0.200 | 1 ==> | 0 |
| 58                                 | 1 | 0.167 | 3 --> | 2 |
| 61                                 | 1 | 0.154 | 0 --> | 1 |
| 84                                 | 1 | 0.200 | 2 ==> | 0 |
| 103                                | 1 | 0.200 | 1 ==> | 0 |
| 105                                | 1 | 0.133 | 1 ==> | 0 |
| 106                                | 2 | 0.107 | 0 ==> | 2 |
| 108                                | 1 | 0.333 | 0 ==> | 1 |
| 110                                | 2 | 0.143 | 3 ==> | 1 |
| 111                                | 1 | 0.111 | 0 ==> | 1 |
| 123                                | 1 | 0.167 | 1 ==> | 0 |
| 124                                | 1 | 0.333 | 0 ==> | 1 |
| 127                                | 2 | 0.138 | 3 ==> | 1 |
| 128                                | 1 | 0.143 | 0 ==> | 1 |
| 139                                | 1 | 0.227 | 1 ==> | 2 |
| 146                                | 1 | 0.250 | 1 ==> | 0 |
| 152                                | 1 | 0.333 | 1 ==> | 0 |
| 155                                | 1 | 0.200 | 0 --> | 1 |
| 185                                | 1 | 0.250 | 0 ==> | 1 |
| 190                                | 1 | 0.167 | 0 ==> | 1 |
| 195                                | 1 | 0.182 | 0 ==> | 1 |
| 197                                | 1 | 0.333 | 0 ==> | 1 |
| 198                                | 1 | 0.333 | 0 ==> | 1 |
| 215                                | 1 | 0.143 | 1 ==> | 0 |
| 221                                | 1 | 0.143 | 1 ==> | 0 |
| 222                                | 1 | 0.500 | 0 ==> | 2 |
| 226                                | 1 | 0.111 | 0 ==> | 1 |
| 229                                | 1 | 1.000 | 0 ==> | 1 |
| 231                                | 1 | 0.333 | 0 ==> | 1 |
| 249                                | 1 | 0.111 | 0 ==> | 1 |
| 253                                | 1 | 0.278 | 1 ==> | 0 |
| 277                                | 1 | 0.091 | 0 --> | 1 |

|                     |     |   |       |   |     |   |
|---------------------|-----|---|-------|---|-----|---|
|                     | 278 | 1 | 0.091 | 0 | --> | 1 |
| node_64 --> node_62 | 1   | 1 | 0.100 | 0 | --> | 1 |
|                     | 2   | 1 | 0.167 | 0 | --> | 1 |
|                     | 8   | 1 | 0.500 | 0 | --> | 1 |
|                     | 13  | 1 | 0.273 | 1 | --> | 0 |
|                     | 21  | 1 | 0.125 | 0 | --> | 1 |
|                     | 39  | 1 | 0.333 | 0 | --> | 1 |
|                     | 44  | 2 | 1.000 | 0 | --> | 2 |
|                     | 47  | 1 | 0.200 | 1 | --> | 2 |
|                     | 67  | 1 | 0.143 | 1 | --> | 2 |
|                     | 77  | 1 | 0.200 | 0 | ==> | 1 |
|                     | 79  | 1 | 1.000 | 0 | ==> | 1 |
|                     | 94  | 1 | 0.250 | 1 | --> | 0 |
|                     | 111 | 1 | 0.111 | 0 | --> | 1 |
|                     | 119 | 1 | 0.333 | 0 | --> | 1 |
|                     | 128 | 1 | 0.143 | 0 | --> | 1 |
|                     | 129 | 1 | 0.154 | 1 | --> | 2 |
|                     | 135 | 1 | 0.200 | 0 | --> | 1 |
|                     | 173 | 2 | 0.286 | 2 | --> | 0 |
|                     | 188 | 1 | 0.250 | 0 | --> | 1 |
|                     | 221 | 1 | 0.143 | 1 | --> | 2 |
|                     | 234 | 1 | 0.200 | 1 | --> | 0 |
| node_62 --> node_61 | 40  | 2 | 0.231 | 2 | --> | 0 |
|                     | 60  | 2 | 0.158 | 2 | --> | 0 |
|                     | 65  | 1 | 0.200 | 1 | --> | 0 |
|                     | 69  | 1 | 0.154 | 1 | --> | 2 |
|                     | 78  | 1 | 0.200 | 1 | --> | 0 |
|                     | 86  | 1 | 0.400 | 0 | --> | 1 |
|                     | 98  | 1 | 0.286 | 0 | --> | 2 |
|                     | 102 | 1 | 0.200 | 2 | --> | 1 |
|                     | 105 | 1 | 0.133 | 1 | --> | 0 |
|                     | 110 | 2 | 0.143 | 2 | --> | 4 |
|                     | 118 | 1 | 0.375 | 4 | --> | 2 |
|                     | 123 | 1 | 0.167 | 1 | --> | 0 |
|                     | 127 | 2 | 0.138 | 2 | --> | 4 |
|                     | 132 | 1 | 0.250 | 0 | --> | 1 |
|                     | 134 | 1 | 0.200 | 1 | --> | 0 |
|                     | 139 | 1 | 0.227 | 1 | --> | 0 |
|                     | 146 | 1 | 0.250 | 1 | --> | 0 |
|                     | 148 | 1 | 0.143 | 2 | --> | 1 |
|                     | 153 | 1 | 0.222 | 1 | --> | 2 |
|                     | 159 | 1 | 0.250 | 0 | --> | 1 |
|                     | 160 | 1 | 0.111 | 0 | --> | 1 |
|                     | 162 | 1 | 0.364 | 2 | --> | 3 |
|                     | 175 | 1 | 0.143 | 1 | ==> | 2 |
|                     | 186 | 1 | 0.158 | 3 | ==> | 4 |
|                     | 187 | 1 | 0.158 | 2 | ==> | 3 |
|                     | 209 | 1 | 1.000 | 1 | ==> | 2 |
|                     | 219 | 1 | 0.125 | 0 | --> | 1 |
|                     | 227 | 1 | 0.286 | 0 | ==> | 1 |
|                     | 241 | 1 | 0.250 | 0 | --> | 1 |

|                                         |     |       |       |     |       |
|-----------------------------------------|-----|-------|-------|-----|-------|
| 249                                     | 1   | 0.111 | 0     | ==> | 1     |
| 252                                     | 1   | 0.182 | 0     | ==> | 1     |
| 264                                     | 1   | 0.200 | 0     | ==> | 1     |
| 267                                     | 1   | 0.154 | 0     | --> | 1     |
| 271                                     | 1   | 0.200 | 1     | ==> | 0     |
| 274                                     | 1   | 0.250 | 2     | --> | 1     |
| node_61 --> node_60                     | 194 | 1     | 0.143 | 2   | --> 1 |
| 215                                     | 1   | 0.143 | 0     | --> | 1     |
| 254                                     | 1   | 0.182 | 2     | --> | 1     |
| 278                                     | 1   | 0.091 | 1     | ==> | 0     |
| node_60 --> node_59                     | 219 | 1     | 0.125 | 1   | --> 0 |
| 228                                     | 1   | 1.000 | 0     | ==> | 1     |
| 277                                     | 1   | 0.091 | 0     | --> | 1     |
| 280                                     | 1   | 0.125 | 2     | ==> | 1     |
| node_59 --> Myzopoda aurita             | 29  | 1     | 0.214 | 0   | --> 1 |
| 92                                      | 1   | 0.250 | 0     | ==> | 1     |
| 152                                     | 1   | 0.333 | 1     | ==> | 0     |
| 172                                     | 1   | 0.167 | 0     | ==> | 1     |
| 241                                     | 1   | 0.250 | 1     | --> | 0     |
| 254                                     | 1   | 0.182 | 1     | --> | 2     |
| 259                                     | 1   | 0.125 | 0     | ==> | 1     |
| 267                                     | 1   | 0.154 | 1     | ==> | 0     |
| node_59 --> Myzopoda schliemanni        | 34  | 1     | 0.158 | 1   | ==> 0 |
| 43                                      | 1   | 0.600 | 2     | ==> | 3     |
| 94                                      | 1   | 0.250 | 0     | --> | 1     |
| 154                                     | 1   | 0.143 | 0     | ==> | 1     |
| 194                                     | 1   | 0.143 | 1     | ==> | 0     |
| 231                                     | 1   | 0.333 | 0     | ==> | 1     |
| node_61 --> Phasmatonycteris phiomensis | 253 | 1     | 0.278 | 1   | ==> 2 |
| node_62 --> Saccopteryx bilineata       | 3   | 1     | 1.000 | 0   | ==> 1 |
| 17                                      | 1   | 0.200 | 0     | --> | 1     |
| 18                                      | 1   | 0.167 | 1     | --> | 0     |
| 23                                      | 1   | 0.133 | 1     | ==> | 2     |
| 24                                      | 1   | 0.100 | 1     | ==> | 0     |
| 34                                      | 1   | 0.158 | 1     | ==> | 2     |
| 43                                      | 2   | 0.600 | 2     | ==> | 0     |
| 46                                      | 1   | 0.250 | 0     | ==> | 1     |
| 58                                      | 1   | 0.167 | 2     | ==> | 1     |
| 59                                      | 1   | 0.125 | 1     | ==> | 0     |
| 60                                      | 1   | 0.158 | 2     | ==> | 3     |
| 61                                      | 1   | 0.154 | 0     | --> | 1     |
| 63                                      | 2   | 0.125 | 0     | ==> | 2     |
| 66                                      | 1   | 0.286 | 0     | --> | 1     |
| 69                                      | 1   | 0.154 | 1     | ==> | 0     |
| 85                                      | 1   | 0.200 | 1     | ==> | 0     |
| 95                                      | 1   | 1.000 | 0     | ==> | 1     |
| 103                                     | 1   | 0.200 | 1     | ==> | 0     |
| 105                                     | 1   | 0.133 | 1     | ==> | 2     |
| 106                                     | 3   | 0.107 | 0     | ==> | 3     |
| 108                                     | 1   | 0.333 | 0     | ==> | 2     |
| 110                                     | 1   | 0.143 | 2     | ==> | 1     |

|                                     |   |       |   |     |   |
|-------------------------------------|---|-------|---|-----|---|
| 116                                 | 1 | 0.167 | 0 | ==> | 1 |
| 117                                 | 1 | 0.167 | 0 | ==> | 1 |
| 122                                 | 1 | 0.250 | 3 | ==> | 2 |
| 123                                 | 1 | 0.167 | 1 | ==> | 2 |
| 124                                 | 1 | 0.333 | 0 | ==> | 1 |
| 139                                 | 1 | 0.227 | 1 | --> | 2 |
| 163                                 | 1 | 0.200 | 0 | ==> | 1 |
| 164                                 | 1 | 0.222 | 1 | ==> | 2 |
| 165                                 | 1 | 0.125 | 1 | ==> | 2 |
| 167                                 | 1 | 0.154 | 2 | ==> | 1 |
| 169                                 | 1 | 0.200 | 0 | ==> | 1 |
| 184                                 | 1 | 0.143 | 1 | ==> | 0 |
| 193                                 | 1 | 0.200 | 1 | ==> | 0 |
| 206                                 | 1 | 0.286 | 2 | --> | 1 |
| 208                                 | 1 | 0.250 | 0 | ==> | 1 |
| 223                                 | 1 | 0.222 | 1 | ==> | 2 |
| 226                                 | 1 | 0.111 | 0 | ==> | 1 |
| 232                                 | 1 | 0.200 | 1 | ==> | 0 |
| 236                                 | 1 | 0.143 | 0 | ==> | 1 |
| 247                                 | 1 | 0.200 | 1 | ==> | 0 |
| 250                                 | 1 | 0.222 | 1 | ==> | 0 |
| 255                                 | 1 | 0.200 | 1 | ==> | 0 |
| 259                                 | 1 | 0.125 | 0 | ==> | 1 |
| 277                                 | 1 | 0.091 | 0 | --> | 1 |
| node_63 --> Hipposideros commersoni |   |       |   |     | 1 |
| 15                                  | 1 | 0.250 | 0 | ==> | 1 |
| 21                                  | 1 | 0.125 | 0 | --> | 1 |
| 23                                  | 1 | 0.133 | 1 | ==> | 2 |
| 25                                  | 1 | 0.200 | 2 | ==> | 3 |
| 34                                  | 1 | 0.158 | 1 | ==> | 2 |
| 35                                  | 1 | 0.500 | 0 | --> | 1 |
| 36                                  | 1 | 0.333 | 0 | --> | 1 |
| 39                                  | 1 | 0.333 | 0 | --> | 1 |
| 40                                  | 1 | 0.231 | 2 | ==> | 1 |
| 43                                  | 2 | 0.600 | 2 | ==> | 0 |
| 46                                  | 1 | 0.250 | 0 | ==> | 1 |
| 58                                  | 1 | 0.167 | 2 | ==> | 3 |
| 63                                  | 1 | 0.125 | 0 | ==> | 1 |
| 66                                  | 1 | 0.286 | 0 | --> | 1 |
| 83                                  | 1 | 0.200 | 0 | --> | 1 |
| 86                                  | 1 | 0.400 | 0 | --> | 1 |
| 98                                  | 1 | 0.286 | 0 | --> | 1 |
| 106                                 | 1 | 0.107 | 0 | --> | 1 |
| 131                                 | 1 | 0.444 | 1 | --> | 2 |
| 139                                 | 4 | 0.227 | 1 | --> | 5 |
| 140                                 | 2 | 0.222 | 0 | --> | 2 |
| 141                                 | 1 | 0.500 | 0 | --> | 1 |
| 143                                 | 1 | 0.200 | 0 | --> | 1 |
| 162                                 | 1 | 0.364 | 2 | --> | 3 |
| 174                                 | 1 | 0.167 | 0 | ==> | 1 |
| 202                                 | 1 | 0.182 | 0 | --> | 1 |

|                                                         |   |       |         |
|---------------------------------------------------------|---|-------|---------|
| 207                                                     | 1 | 0.100 | 0 --> 1 |
| 220                                                     | 2 | 0.111 | 0 --> 2 |
| 251                                                     | 2 | 0.333 | 0 --> 2 |
| 263                                                     | 2 | 0.222 | 0 --> 2 |
| 276                                                     | 1 | 0.500 | 0 --> 1 |
| node_63 --> Pteropus scapulatus 12      1 0.455 1 ==> 0 |   |       |         |
| 17                                                      | 1 | 0.200 | 0 --> 1 |
| 25                                                      | 2 | 0.200 | 2 ==> 0 |
| 29                                                      | 1 | 0.214 | 2 ==> 3 |
| 34                                                      | 1 | 0.158 | 1 ==> 0 |
| 37                                                      | 1 | 0.200 | 1 ==> 0 |
| 49                                                      | 2 | 0.286 | 0 --> 2 |
| 56                                                      | 2 | 0.250 | 0 --> 2 |
| 57                                                      | 2 | 0.286 | 0 --> 2 |
| 58                                                      | 2 | 0.167 | 2 ==> 0 |
| 59                                                      | 1 | 0.125 | 1 ==> 0 |
| 61                                                      | 1 | 0.154 | 1 ==> 2 |
| 67                                                      | 1 | 0.143 | 1 --> 2 |
| 68                                                      | 1 | 0.500 | 0 ==> 1 |
| 70                                                      | 1 | 0.400 | 2 ==> 1 |
| 73                                                      | 1 | 1.000 | 0 ==> 1 |
| 130                                                     | 1 | 0.333 | 0 ==> 1 |
| 145                                                     | 1 | 0.667 | 0 ==> 4 |
| 148                                                     | 1 | 0.143 | 2 ==> 1 |
| 149                                                     | 1 | 0.333 | 0 ==> 1 |
| 151                                                     | 1 | 0.400 | 0 --> 3 |
| 159                                                     | 1 | 0.250 | 0 ==> 1 |
| 160                                                     | 1 | 0.111 | 0 ==> 1 |
| 165                                                     | 1 | 0.125 | 1 ==> 0 |
| 167                                                     | 2 | 0.154 | 2 ==> 0 |
| 171                                                     | 1 | 1.000 | 0 ==> 1 |
| 178                                                     | 1 | 0.250 | 0 --> 1 |
| 185                                                     | 2 | 0.250 | 0 --> 2 |
| 194                                                     | 1 | 0.143 | 1 ==> 0 |
| 195                                                     | 1 | 0.182 | 0 ==> 2 |
| 210                                                     | 1 | 0.200 | 1 ==> 0 |
| 211                                                     | 1 | 0.500 | 0 ==> 1 |
| 235                                                     | 1 | 0.250 | 1 ==> 0 |
| 258                                                     | 1 | 1.000 | 0 ==> 1 |
| 266                                                     | 1 | 0.500 | 0 ==> 1 |
| 267                                                     | 1 | 0.154 | 1 ==> 2 |
| 268                                                     | 1 | 0.500 | 0 ==> 1 |
| 269                                                     | 2 | 0.222 | 0 --> 2 |

\*\*\*\*\*

## 2. Bayesian analysis of total evidence data - synapomorphies under Delayed Transformation (DELTRAN)

```
paup> set opt=deltran;
```

/----- *Speonycteris aurantiadens*  
 /---88  
 | \---- *Micronycteris hirsuta*  
 /-----87  
 | \----- *Mimon bennettii*  
 |  
 | /---- *Macrotus californicus*  
 +-----71  
 | \---- *Macrotus waterhousii*  
 |  
 | /---- *Desmodus rotundus*  
 /---72  
 | \---- *Diaemus youngi*  
 /---86  
 | | /-----73  
 | | \----- *Diphylla ecaudata*  
 | |  
 | | /----- *Lophostoma evotis*  
 | | |  
 | | +----- *Phyllostomus hastatus hastatus*  
 | | /--76  
 | | | /----- *Phylloderma stenops stenops*  
 | | |  
 | \--85 /---77 \--75 /---- *Notonycteris magdalenensis*

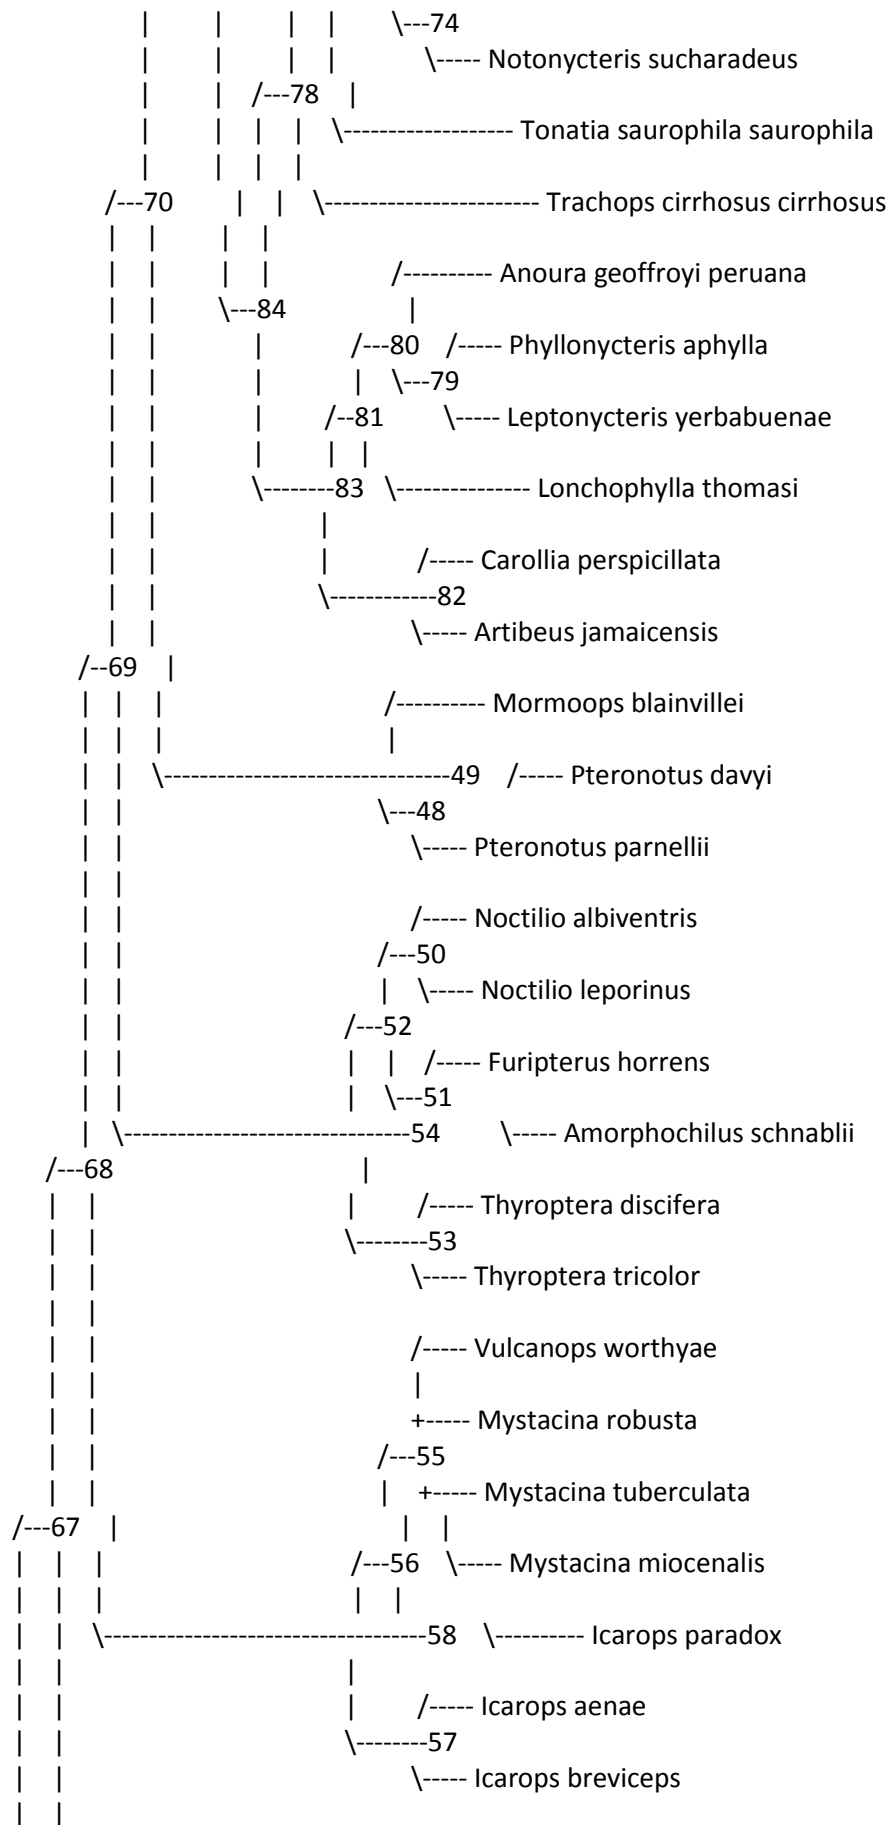

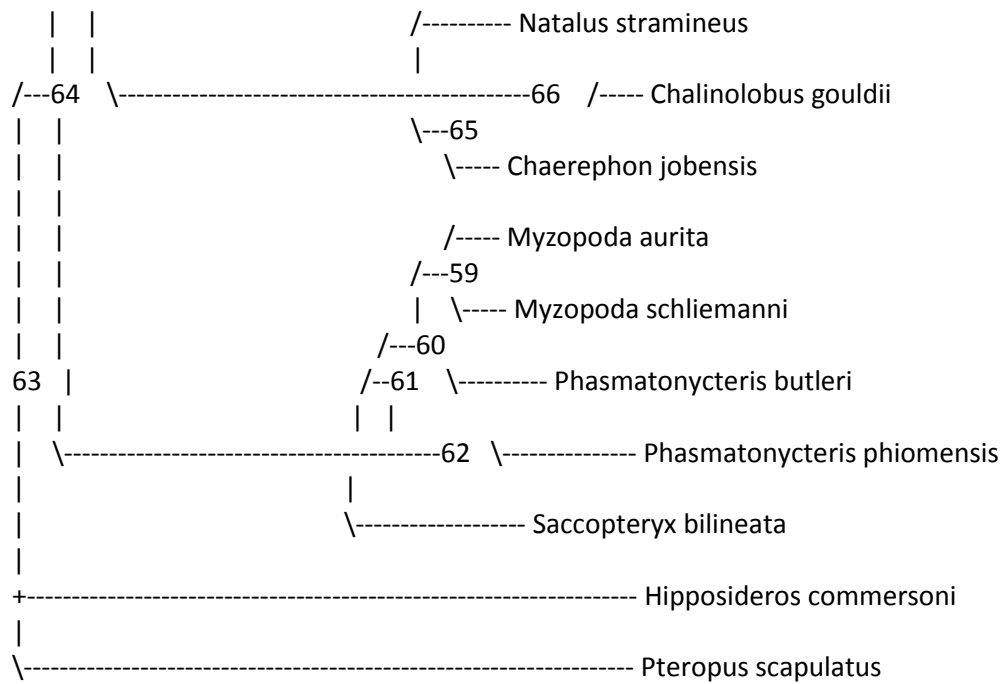

#### Apomorphy lists:

| Branch              | Character | Steps | CI      | Change  |
|---------------------|-----------|-------|---------|---------|
| <hr/>               |           |       |         |         |
| node_63 --> node_64 | 5         | 1     | 0.273   | 1 ==> 0 |
| 29                  | 1         | 0.214 | 2 ==> 1 |         |
| 50                  | 2         | 0.400 | 0 --> 2 |         |
| 129                 | 1         | 0.154 | 0 --> 1 |         |
| 136                 | 1         | 0.500 | 0 --> 1 |         |
| 154                 | 1         | 0.143 | 1 ==> 0 |         |
| 158                 | 1         | 0.200 | 0 ==> 1 |         |
| 186                 | 2         | 0.158 | 1 --> 3 |         |
| 194                 | 1         | 0.143 | 1 ==> 2 |         |
| 210                 | 1         | 0.200 | 1 ==> 2 |         |
| 214                 | 1         | 0.333 | 2 --> 3 |         |
| 233                 | 1         | 0.286 | 0 --> 1 |         |
| 242                 | 1         | 0.333 | 0 --> 1 |         |
| node_64 --> node_67 | 11        | 1     | 0.250   | 0 ==> 1 |
| 52                  | 1         | 1.000 | 0 --> 1 |         |
| 55                  | 1         | 0.167 | 1 ==> 0 |         |
| 98                  | 1         | 0.286 | 0 --> 4 |         |
| 102                 | 1         | 0.200 | 1 --> 2 |         |
| 105                 | 1         | 0.133 | 0 --> 1 |         |
| 123                 | 1         | 0.167 | 0 --> 1 |         |
| 153                 | 1         | 0.222 | 2 --> 1 |         |
| 206                 | 1         | 0.286 | 1 --> 2 |         |
| 215                 | 1         | 0.143 | 0 --> 1 |         |
| 274                 | 1         | 0.250 | 1 --> 2 |         |
| node_67 --> node_68 | 12        | 1     | 0.455   | 1 ==> 0 |
| 40                  | 1         | 0.231 | 2 --> 3 |         |
| 192                 | 1         | 0.214 | 1 --> 3 |         |

|                     |     |   |       |   |     |   |
|---------------------|-----|---|-------|---|-----|---|
|                     | 277 | 1 | 0.091 | 0 | --> | 1 |
| node_68 --> node_69 | 13  | 1 | 0.273 | 1 | --> | 2 |
|                     | 34  | 1 | 0.158 | 1 | ==> | 0 |
|                     | 36  | 1 | 0.333 | 0 | --> | 1 |
|                     | 106 | 1 | 0.107 | 0 | --> | 1 |
|                     | 112 | 1 | 0.125 | 0 | --> | 1 |
|                     | 117 | 1 | 0.167 | 0 | --> | 1 |
|                     | 164 | 1 | 0.222 | 1 | ==> | 2 |
|                     | 187 | 1 | 0.158 | 0 | --> | 1 |
| node_69 --> node_70 | 6   | 2 | 1.000 | 0 | --> | 2 |
|                     | 13  | 1 | 0.273 | 2 | ==> | 3 |
|                     | 29  | 1 | 0.214 | 1 | ==> | 2 |
|                     | 60  | 2 | 0.158 | 2 | ==> | 0 |
|                     | 110 | 1 | 0.143 | 2 | ==> | 1 |
|                     | 120 | 1 | 0.143 | 0 | --> | 1 |
|                     | 127 | 1 | 0.138 | 2 | ==> | 1 |
|                     | 128 | 1 | 0.143 | 0 | ==> | 1 |
|                     | 173 | 1 | 0.286 | 2 | ==> | 1 |
|                     | 196 | 1 | 0.200 | 0 | --> | 1 |
|                     | 202 | 1 | 0.182 | 0 | --> | 1 |
|                     | 215 | 1 | 0.143 | 1 | ==> | 0 |
|                     | 220 | 1 | 0.111 | 0 | --> | 1 |
|                     | 234 | 1 | 0.200 | 1 | ==> | 0 |
|                     | 241 | 1 | 0.250 | 0 | ==> | 1 |
|                     | 260 | 1 | 0.250 | 0 | --> | 1 |
| node_70 --> node_86 | 1   | 1 | 0.100 | 0 | --> | 1 |
|                     | 5   | 1 | 0.273 | 0 | --> | 1 |
|                     | 49  | 1 | 0.286 | 0 | ==> | 1 |
|                     | 54  | 1 | 0.200 | 0 | ==> | 1 |
|                     | 67  | 1 | 0.143 | 1 | --> | 2 |
|                     | 74  | 1 | 0.200 | 1 | --> | 0 |
|                     | 111 | 1 | 0.111 | 0 | --> | 1 |
|                     | 131 | 1 | 0.444 | 1 | ==> | 2 |
|                     | 139 | 4 | 0.227 | 1 | ==> | 5 |
|                     | 140 | 2 | 0.222 | 0 | ==> | 2 |
|                     | 152 | 1 | 0.333 | 1 | ==> | 0 |
|                     | 158 | 1 | 0.200 | 1 | --> | 0 |
|                     | 173 | 1 | 0.286 | 1 | --> | 0 |
|                     | 263 | 1 | 0.222 | 0 | ==> | 1 |
| node_86 --> node_87 | 19  | 1 | 0.200 | 0 | --> | 1 |
|                     | 25  | 1 | 0.200 | 2 | ==> | 3 |
|                     | 51  | 1 | 0.167 | 0 | ==> | 1 |
|                     | 69  | 1 | 0.154 | 1 | --> | 0 |
|                     | 71  | 1 | 0.111 | 2 | ==> | 1 |
|                     | 78  | 1 | 0.200 | 1 | --> | 0 |
|                     | 83  | 1 | 0.200 | 0 | ==> | 1 |
|                     | 108 | 1 | 0.333 | 0 | ==> | 1 |
|                     | 124 | 1 | 0.333 | 0 | ==> | 1 |
|                     | 143 | 1 | 0.200 | 0 | ==> | 1 |
|                     | 260 | 1 | 0.250 | 1 | ==> | 0 |
| node_87 --> node_88 | 38  | 1 | 0.250 | 0 | ==> | 1 |

|                                          |   |       |       |                 |
|------------------------------------------|---|-------|-------|-----------------|
| 63                                       | 2 | 0.125 | 0 ==> | 2               |
| 164                                      | 1 | 0.222 | 2 ==> | 1               |
| 187                                      | 1 | 0.158 | 1 --> | 2               |
| 271                                      | 1 | 0.200 | 1 --> | 0               |
| node_88 --> Speonycteris aurantiadens 23 |   |       |       | 1 0.133 1 ==> 2 |
| 27                                       | 1 | 1.000 | 0 ==> | 1               |
| 176                                      | 1 | 0.400 | 0 ==> | 1               |
| 186                                      | 1 | 0.158 | 3 ==> | 4               |
| 187                                      | 1 | 0.158 | 2 ==> | 3               |
| 192                                      | 1 | 0.214 | 3 ==> | 1               |
| 202                                      | 1 | 0.182 | 1 ==> | 2               |
| 203                                      | 1 | 0.250 | 1 --> | 0               |
| 220                                      | 1 | 0.111 | 1 ==> | 0               |
| 221                                      | 1 | 0.143 | 1 ==> | 0               |
| 237                                      | 1 | 0.333 | 1 ==> | 0               |
| 252                                      | 1 | 0.182 | 0 ==> | 1               |
| 253                                      | 1 | 0.278 | 1 --> | 0               |
| 264                                      | 1 | 0.200 | 0 ==> | 1               |
| node_88 --> Micronycteris hirsuta 26     |   |       |       | 1 0.250 0 ==> 1 |
| 31                                       | 1 | 0.286 | 1 ==> | 2               |
| 34                                       | 1 | 0.158 | 0 --> | 1               |
| 53                                       | 1 | 0.125 | 0 --> | 1               |
| 55                                       | 1 | 0.167 | 0 --> | 1               |
| 57                                       | 1 | 0.286 | 0 --> | 1               |
| 60                                       | 2 | 0.158 | 0 --> | 2               |
| 61                                       | 1 | 0.154 | 1 ==> | 0               |
| 64                                       | 1 | 0.667 | 1 ==> | 2               |
| 84                                       | 1 | 0.200 | 2 --> | 0               |
| 87                                       | 1 | 0.250 | 0 --> | 1               |
| 93                                       | 1 | 0.200 | 0 --> | 1               |
| 98                                       | 1 | 0.286 | 4 --> | 3               |
| 103                                      | 1 | 0.200 | 1 --> | 2               |
| 106                                      | 2 | 0.107 | 1 --> | 3               |
| 112                                      | 1 | 0.125 | 1 --> | 2               |
| 135                                      | 1 | 0.200 | 0 --> | 1               |
| 146                                      | 1 | 0.250 | 1 --> | 0               |
| 153                                      | 1 | 0.222 | 1 --> | 0               |
| 161                                      | 1 | 0.167 | 0 --> | 1               |
| 162                                      | 1 | 0.364 | 2 ==> | 1               |
| 165                                      | 1 | 0.125 | 1 --> | 2               |
| 167                                      | 1 | 0.154 | 2 --> | 1               |
| 172                                      | 1 | 0.167 | 0 ==> | 1               |
| 207                                      | 1 | 0.100 | 0 --> | 1               |
| 210                                      | 1 | 0.200 | 2 --> | 1               |
| 221                                      | 1 | 0.143 | 1 ==> | 2               |
| 253                                      | 1 | 0.278 | 1 --> | 2               |
| 263                                      | 1 | 0.222 | 1 ==> | 0               |
| node_87 --> Mimon bennettii 1            |   |       |       | 1 0.100 1 ==> 0 |
| 16                                       | 1 | 0.222 | 0 --> | 1               |
| 18                                       | 1 | 0.167 | 0 ==> | 1               |
| 24                                       | 1 | 0.100 | 1 --> | 0               |

|                                   |    |       |       |         |
|-----------------------------------|----|-------|-------|---------|
| 47                                | 1  | 0.200 | 1 ==> | 0       |
| 49                                | 1  | 0.286 | 1 ==> | 0       |
| 54                                | 1  | 0.200 | 1 ==> | 0       |
| 105                               | 1  | 0.133 | 1 ==> | 0       |
| 106                               | 1  | 0.107 | 1 ==> | 0       |
| 111                               | 1  | 0.111 | 1 ==> | 0       |
| 117                               | 1  | 0.167 | 1 ==> | 0       |
| 120                               | 1  | 0.143 | 1 ==> | 2       |
| 128                               | 1  | 0.143 | 1 ==> | 0       |
| 148                               | 2  | 0.143 | 2 ==> | 0       |
| 150                               | 1  | 0.200 | 0 ==> | 1       |
| 165                               | 1  | 0.125 | 1 --> | 2       |
| 167                               | 2  | 0.154 | 2 ==> | 0       |
| 174                               | 1  | 0.167 | 0 ==> | 1       |
| 196                               | 1  | 0.200 | 1 ==> | 0       |
| 203                               | 1  | 0.250 | 1 --> | 0       |
| 210                               | 1  | 0.200 | 2 --> | 1       |
| 223                               | 1  | 0.222 | 1 ==> | 2       |
| 226                               | 1  | 0.111 | 0 ==> | 1       |
| 232                               | 1  | 0.200 | 1 ==> | 0       |
| 234                               | 1  | 0.200 | 0 ==> | 1       |
| 269                               | 1  | 0.222 | 0 ==> | 1       |
| 278                               | 1  | 0.091 | 1 ==> | 0       |
| node_86 --> node_71               | 19 | 1     | 0.200 | 0 --> 1 |
| 23                                | 1  | 0.133 | 1 --> | 0       |
| 24                                | 1  | 0.100 | 1 --> | 0       |
| 37                                | 1  | 0.200 | 1 ==> | 0       |
| 53                                | 1  | 0.125 | 0 ==> | 1       |
| 56                                | 1  | 0.250 | 0 ==> | 1       |
| 59                                | 1  | 0.125 | 1 --> | 0       |
| 63                                | 1  | 0.125 | 0 ==> | 1       |
| 93                                | 1  | 0.200 | 0 --> | 1       |
| 98                                | 1  | 0.286 | 4 ==> | 2       |
| 105                               | 1  | 0.133 | 1 ==> | 2       |
| 106                               | 2  | 0.107 | 1 ==> | 3       |
| 118                               | 1  | 0.375 | 4 ==> | 2       |
| 132                               | 1  | 0.250 | 0 ==> | 1       |
| 146                               | 1  | 0.250 | 1 ==> | 0       |
| 161                               | 1  | 0.167 | 0 ==> | 1       |
| 184                               | 1  | 0.143 | 1 --> | 0       |
| 186                               | 2  | 0.158 | 3 ==> | 1       |
| 207                               | 1  | 0.100 | 0 --> | 1       |
| 208                               | 1  | 0.250 | 0 ==> | 1       |
| 215                               | 1  | 0.143 | 0 ==> | 1       |
| 217                               | 1  | 0.286 | 2 ==> | 1       |
| 220                               | 1  | 0.111 | 1 ==> | 2       |
| 223                               | 1  | 0.222 | 1 ==> | 2       |
| 235                               | 1  | 0.250 | 1 ==> | 2       |
| 237                               | 1  | 0.333 | 1 ==> | 2       |
| 271                               | 1  | 0.200 | 1 --> | 0       |
| node_71 --> Macrotus californicus | 20 | 1     | 0.333 | 0 ==> 1 |

|                                     |   |       |   |     |   |
|-------------------------------------|---|-------|---|-----|---|
| 61                                  | 1 | 0.154 | 1 | ==> | 0 |
| 69                                  | 1 | 0.154 | 1 | --> | 0 |
| 112                                 | 1 | 0.125 | 1 | ==> | 0 |
| 148                                 | 1 | 0.143 | 2 | ==> | 1 |
| 170                                 | 1 | 0.333 | 0 | ==> | 1 |
| 187                                 | 1 | 0.158 | 1 | --> | 2 |
| 192                                 | 1 | 0.214 | 3 | ==> | 2 |
| 221                                 | 1 | 0.143 | 1 | ==> | 2 |
| 226                                 | 1 | 0.111 | 0 | ==> | 1 |
| 236                                 | 1 | 0.143 | 0 | --> | 2 |
| 250                                 | 1 | 0.222 | 1 | ==> | 0 |
| 253                                 | 1 | 0.278 | 1 | ==> | 0 |
| node_71 --> Macrotus waterhousii 26 |   |       |   |     |   |
| 34                                  | 1 | 0.158 | 0 | ==> | 1 |
| 38                                  | 1 | 0.250 | 0 | ==> | 1 |
| 58                                  | 1 | 0.167 | 2 | ==> | 1 |
| 78                                  | 1 | 0.200 | 1 | --> | 0 |
| 87                                  | 1 | 0.250 | 0 | ==> | 1 |
| 123                                 | 1 | 0.167 | 1 | ==> | 2 |
| 131                                 | 1 | 0.444 | 2 | ==> | 3 |
| 182                                 | 1 | 0.200 | 0 | ==> | 1 |
| 185                                 | 1 | 0.250 | 0 | ==> | 1 |
| 187                                 | 1 | 0.158 | 1 | ==> | 0 |
| 195                                 | 1 | 0.182 | 0 | ==> | 1 |
| 206                                 | 1 | 0.286 | 2 | ==> | 1 |
| 236                                 | 1 | 0.143 | 0 | --> | 1 |
| 244                                 | 1 | 0.333 | 0 | ==> | 1 |
| 249                                 | 1 | 0.111 | 0 | ==> | 1 |
| 250                                 | 1 | 0.222 | 1 | ==> | 2 |
| 254                                 | 2 | 0.182 | 2 | ==> | 0 |
| 270                                 | 1 | 0.333 | 0 | ==> | 1 |
| node_86 --> node_85                 |   |       |   |     |   |
| 23                                  | 1 | 0.133 | 1 | --> | 0 |
| 59                                  | 1 | 0.125 | 1 | --> | 0 |
| 167                                 | 1 | 0.154 | 2 | --> | 1 |
| 185                                 | 2 | 0.250 | 0 | ==> | 2 |
| node_85 --> node_73                 |   |       |   |     |   |
| 5                                   | 1 | 0.273 | 1 | --> | 4 |
| 9                                   | 1 | 0.250 | 0 | --> | 1 |
| 11                                  | 1 | 0.250 | 1 | --> | 0 |
| 12                                  | 5 | 0.455 | 0 | ==> | 5 |
| 20                                  | 1 | 0.333 | 0 | ==> | 1 |
| 21                                  | 1 | 0.125 | 0 | ==> | 1 |
| 24                                  | 1 | 0.100 | 1 | --> | 0 |
| 25                                  | 1 | 0.200 | 2 | ==> | 1 |
| 29                                  | 1 | 0.214 | 2 | ==> | 3 |
| 31                                  | 1 | 0.286 | 1 | --> | 0 |
| 38                                  | 1 | 0.250 | 0 | ==> | 1 |
| 39                                  | 1 | 0.333 | 0 | ==> | 1 |
| 46                                  | 1 | 0.250 | 0 | ==> | 1 |
| 61                                  | 1 | 0.154 | 1 | --> | 2 |
| 64                                  | 1 | 0.667 | 1 | ==> | 0 |
| 69                                  | 1 | 0.154 | 1 | ==> | 2 |

|                                  |    |       |       |     |       |
|----------------------------------|----|-------|-------|-----|-------|
| 70                               | 1  | 0.400 | 2     | ==> | 1     |
| 75                               | 1  | 0.333 | 0     | ==> | 1     |
| 84                               | 1  | 0.200 | 2     | --> | 0     |
| 93                               | 1  | 0.200 | 0     | --> | 1     |
| 98                               | 1  | 0.286 | 4     | ==> | 0     |
| 101                              | 1  | 0.500 | 0     | ==> | 1     |
| 110                              | 3  | 0.143 | 1     | ==> | 4     |
| 114                              | 1  | 0.250 | 0     | ==> | 1     |
| 118                              | 1  | 0.375 | 4     | ==> | 0     |
| 127                              | 3  | 0.138 | 1     | ==> | 4     |
| 130                              | 1  | 0.333 | 0     | ==> | 1     |
| 159                              | 1  | 0.250 | 0     | ==> | 1     |
| 160                              | 1  | 0.111 | 0     | ==> | 1     |
| 162                              | 1  | 0.364 | 2     | ==> | 4     |
| 164                              | 2  | 0.222 | 2     | ==> | 0     |
| 165                              | 1  | 0.125 | 1     | ==> | 0     |
| 167                              | 1  | 0.154 | 1     | --> | 0     |
| 169                              | 1  | 0.200 | 0     | ==> | 1     |
| 175                              | 1  | 0.143 | 1     | --> | 2     |
| 178                              | 1  | 0.250 | 0     | ==> | 1     |
| 184                              | 1  | 0.143 | 1     | --> | 0     |
| 187                              | 1  | 0.158 | 1     | ==> | 0     |
| 189                              | 1  | 1.000 | 1     | ==> | 2     |
| 194                              | 2  | 0.143 | 2     | --> | 0     |
| 195                              | 1  | 0.182 | 0     | --> | 2     |
| 207                              | 1  | 0.100 | 0     | --> | 1     |
| 217                              | 2  | 0.286 | 2     | ==> | 0     |
| 221                              | 1  | 0.143 | 1     | ==> | 0     |
| 223                              | 1  | 0.222 | 1     | ==> | 0     |
| 227                              | 2  | 0.286 | 0     | ==> | 2     |
| 233                              | 1  | 0.286 | 1     | ==> | 2     |
| 236                              | 1  | 0.143 | 0     | ==> | 1     |
| 239                              | 1  | 1.000 | 0     | ==> | 1     |
| 243                              | 2  | 0.333 | 0     | ==> | 2     |
| 245                              | 2  | 0.222 | 0     | --> | 2     |
| 247                              | 1  | 0.200 | 1     | --> | 0     |
| 251                              | 1  | 0.333 | 0     | ==> | 1     |
| 252                              | 2  | 0.182 | 0     | ==> | 2     |
| 253                              | 1  | 0.278 | 1     | ==> | 5     |
| 265                              | 1  | 0.500 | 0     | ==> | 1     |
| node_73 --> node_72              | 15 | 1     | 0.250 | 0   | ==> 1 |
| 105                              | 1  | 0.133 | 1     | --> | 0     |
| 149                              | 1  | 0.333 | 0     | ==> | 1     |
| 153                              | 1  | 0.222 | 1     | ==> | 0     |
| 202                              | 1  | 0.182 | 1     | ==> | 0     |
| 204                              | 1  | 0.500 | 1     | ==> | 0     |
| 257                              | 1  | 1.000 | 0     | ==> | 1     |
| node_72 --> Desmodus rotundus 58 | 1  | 0.167 | 2     | ==> | 3     |
| 63                               | 1  | 0.125 | 0     | ==> | 1     |
| 67                               | 2  | 0.143 | 2     | ==> | 0     |
| 106                              | 1  | 0.107 | 1     | ==> | 0     |

|                                  |   |       |   |     |      |
|----------------------------------|---|-------|---|-----|------|
| 113                              | 1 | 1.000 | 0 | ==> | 1    |
| 146                              | 1 | 0.250 | 1 | --> | 0    |
| 154                              | 1 | 0.143 | 0 | ==> | 1    |
| 158                              | 2 | 0.200 | 0 | ==> | 2    |
| node_72 --> Diaemus youngi 25    |   |       |   |     |      |
| 58                               | 1 | 0.167 | 2 | --> | 1    |
| 70                               | 1 | 0.400 | 1 | ==> | 0    |
| 106                              | 1 | 0.107 | 1 | --> | 2    |
| 145                              | 1 | 0.667 | 0 | ==> | 3    |
| 151                              | 1 | 0.400 | 0 | ==> | 1    |
| 186                              | 1 | 0.158 | 3 | --> | {12} |
| 210                              | 1 | 0.200 | 2 | ==> | 3    |
| 220                              | 1 | 0.111 | 1 | --> | 0    |
| 222                              | 1 | 0.500 | 0 | ==> | 1    |
| 251                              | 1 | 0.333 | 1 | --> | 2    |
| node_73 --> Diphylla ecaudata 14 |   |       |   |     |      |
| 17                               | 1 | 0.200 | 0 | --> | 1    |
| 25                               | 1 | 0.200 | 1 | --> | 0    |
| 58                               | 1 | 0.167 | 2 | --> | 1    |
| 76                               | 1 | 0.500 | 0 | ==> | 1    |
| 146                              | 1 | 0.250 | 1 | ==> | 2    |
| 152                              | 3 | 0.333 | 0 | ==> | 3    |
| 153                              | 1 | 0.222 | 1 | ==> | 2    |
| 186                              | 2 | 0.158 | 3 | ==> | 1    |
| 220                              | 1 | 0.111 | 1 | --> | 0    |
| 235                              | 1 | 0.250 | 1 | --> | 0    |
| 237                              | 1 | 0.333 | 1 | --> | 0    |
| 251                              | 1 | 0.333 | 1 | --> | 2    |
| 255                              | 1 | 0.200 | 1 | --> | 0    |
| 259                              | 1 | 0.125 | 0 | --> | 1    |
| 260                              | 1 | 0.250 | 1 | --> | 2    |
| 262                              | 3 | 0.375 | 0 | --> | 3    |
| 263                              | 1 | 0.222 | 1 | --> | 2    |
| 264                              | 2 | 0.200 | 0 | --> | 2    |
| node_85 --> node_84 16           |   |       |   |     |      |
| 216                              | 1 | 1.000 | 1 | --> | 0    |
| node_84 --> node_78 19           |   |       |   |     |      |
| 29                               | 1 | 0.214 | 2 | ==> | 1    |
| 31                               | 1 | 0.286 | 1 | --> | 0    |
| 47                               | 1 | 0.200 | 1 | ==> | 2    |
| 50                               | 1 | 0.400 | 2 | --> | 1    |
| 83                               | 1 | 0.200 | 0 | ==> | 1    |
| 106                              | 2 | 0.107 | 1 | ==> | 3    |
| 148                              | 1 | 0.143 | 2 | --> | 1    |
| 175                              | 1 | 0.143 | 1 | --> | 2    |
| 186                              | 1 | 0.158 | 3 | ==> | 4    |
| 187                              | 2 | 0.158 | 1 | ==> | 3    |
| 188                              | 1 | 0.250 | 0 | ==> | 1    |
| 221                              | 1 | 0.143 | 1 | ==> | 2    |
| 260                              | 1 | 0.250 | 1 | ==> | 0    |
| 263                              | 1 | 0.222 | 1 | ==> | 0    |

|                                              |     |       |            |         |
|----------------------------------------------|-----|-------|------------|---------|
| node_78 --> node_77                          | 220 | 1     | 0.111      | 1 ==> 2 |
| node_77 --> node_76                          | 54  | 1     | 0.200      | 1 --> 0 |
| 84                                           | 1   | 0.200 | 2 --> 0    |         |
| 143                                          | 1   | 0.200 | 0 --> 1    |         |
| 185                                          | 1   | 0.250 | 2 --> 1    |         |
| 271                                          | 1   | 0.200 | 1 --> 0    |         |
| node_76 --> Lophostoma evotis 5              | 1   | 0.273 | 1 ==> 0    |         |
| 14                                           | 1   | 0.667 | 0 ==> 1    |         |
| 25                                           | 1   | 0.200 | 2 ==> 3    |         |
| 53                                           | 1   | 0.125 | 0 --> 1    |         |
| 60                                           | 2   | 0.158 | 0 --> 2    |         |
| 78                                           | 1   | 0.200 | 1 --> 0    |         |
| 82                                           | 1   | 0.500 | 0 ==> 1    |         |
| 84                                           | 1   | 0.200 | 0 ==> 3    |         |
| 97                                           | 1   | 0.125 | 0 --> 1    |         |
| 100                                          | 1   | 0.333 | 0 ==> 1    |         |
| 105                                          | 1   | 0.133 | 1 --> 2    |         |
| 107                                          | 1   | 0.333 | 1 ==> 0    |         |
| 108                                          | 1   | 0.333 | 0 ==> 2    |         |
| 111                                          | 1   | 0.111 | 1 ==> 0    |         |
| 112                                          | 1   | 0.125 | 1 --> 0    |         |
| 123                                          | 1   | 0.167 | 1 ==> 2    |         |
| 124                                          | 1   | 0.333 | 0 ==> 2    |         |
| 134                                          | 1   | 0.200 | 1 --> 0    |         |
| 146                                          | 1   | 0.250 | 1 ==> 0    |         |
| 148                                          | 1   | 0.143 | 1 ==> 2    |         |
| 150                                          | 1   | 0.200 | 0 ==> 1    |         |
| 161                                          | 1   | 0.167 | 0 ==> 1    |         |
| 177                                          | 2   | 0.500 | 0 ==> 2    |         |
| 194                                          | 1   | 0.143 | 2 --> 1    |         |
| 195                                          | 1   | 0.182 | 0 ==> 1    |         |
| 214                                          | 3   | 0.333 | 3 ==> 0    |         |
| 233                                          | 1   | 0.286 | 1 ==> 0    |         |
| 235                                          | 1   | 0.250 | 1 ==> 2    |         |
| 259                                          | 1   | 0.125 | 0 ==> {12} |         |
| node_76 --> Phyllostomus hastatus hastatus 2 | 1   | 0.167 | 0 --> 1    |         |
| 33                                           | 1   | 0.500 | 1 ==> 0    |         |
| 34                                           | 1   | 0.158 | 0 ==> 1    |         |
| 47                                           | 2   | 0.200 | 2 ==> 0    |         |
| 59                                           | 1   | 0.125 | 0 ==> 1    |         |
| 60                                           | 2   | 0.158 | 0 --> 2    |         |
| 61                                           | 1   | 0.154 | 1 ==> 0    |         |
| 66                                           | 1   | 0.286 | 0 ==> 1    |         |
| 67                                           | 1   | 0.143 | 2 ==> 1    |         |
| 71                                           | 1   | 0.111 | 2 --> 1    |         |
| 100                                          | 1   | 0.333 | 0 ==> 2    |         |
| 106                                          | 3   | 0.107 | 3 ==> 0    |         |
| 112                                          | 1   | 0.125 | 1 ==> 2    |         |
| 120                                          | 1   | 0.143 | 1 ==> 0    |         |
| 129                                          | 1   | 0.154 | 1 --> 2    |         |
| 160                                          | 1   | 0.111 | 0 ==> 1    |         |

|                                           |     |       |       |         |
|-------------------------------------------|-----|-------|-------|---------|
| 167                                       | 1   | 0.154 | 1 ==> | 2       |
| 174                                       | 1   | 0.167 | 0 ==> | 1       |
| 190                                       | 1   | 0.167 | 0 ==> | 1       |
| 194                                       | 2   | 0.143 | 2 ==> | 0       |
| 210                                       | 1   | 0.200 | 2 ==> | 1       |
| 220                                       | 1   | 0.111 | 2 ==> | 1       |
| 221                                       | 1   | 0.143 | 2 ==> | 1       |
| 253                                       | 1   | 0.278 | 1 ==> | 0       |
| 277                                       | 1   | 0.091 | 1 ==> | 0       |
| node_76 --> node_75                       | 234 | 1     | 0.200 | 0 ==> 1 |
| 249                                       | 1   | 0.111 | 0 ==> | 1       |
| node_75 --> Phylloderma stenops stenops   | 1   | 1     | 0.100 | 1 --> 0 |
| 2                                         | 1   | 0.167 | 0 --> | 1       |
| 5                                         | 1   | 0.273 | 1 --> | 2       |
| 18                                        | 1   | 0.167 | 0 --> | 1       |
| 20                                        | 1   | 0.333 | 0 --> | 1       |
| 24                                        | 1   | 0.100 | 1 --> | 0       |
| 29                                        | 2   | 0.214 | 1 --> | 3       |
| 51                                        | 1   | 0.167 | 0 --> | 1       |
| 53                                        | 1   | 0.125 | 0 --> | 1       |
| 58                                        | 1   | 0.167 | 2 --> | 1       |
| 97                                        | 1   | 0.125 | 0 --> | 1       |
| 105                                       | 1   | 0.133 | 1 --> | 2       |
| 112                                       | 1   | 0.125 | 1 --> | 0       |
| 120                                       | 1   | 0.143 | 1 --> | 2       |
| 123                                       | 1   | 0.167 | 1 ==> | 2       |
| 129                                       | 1   | 0.154 | 1 ==> | 0       |
| 134                                       | 1   | 0.200 | 1 --> | 0       |
| 145                                       | 1   | 0.667 | 0 --> | 2       |
| 151                                       | 1   | 0.400 | 0 --> | 1       |
| 153                                       | 1   | 0.222 | 1 --> | 0       |
| 154                                       | 1   | 0.143 | 0 --> | 1       |
| 162                                       | 1   | 0.364 | 2 --> | 1       |
| 165                                       | 1   | 0.125 | 1 --> | 0       |
| 179                                       | 1   | 0.333 | 1 --> | 2       |
| 185                                       | 1   | 0.250 | 1 --> | 0       |
| 226                                       | 1   | 0.111 | 0 ==> | 1       |
| 278                                       | 1   | 0.091 | 1 --> | 0       |
| node_75 --> node_74                       | 233 | 1     | 0.286 | 1 ==> 0 |
| node_74 --> Notonycteris magdalenensis    | 78  | 1     | 0.200 | 1 --> 0 |
| 115                                       | 1   | 0.333 | 1 --> | 0       |
| 118                                       | 1   | 0.375 | 4 --> | 1       |
| 119                                       | 1   | 0.333 | 0 --> | 1       |
| 122                                       | 1   | 0.250 | 3 --> | 4       |
| 123                                       | 1   | 0.167 | 1 --> | 0       |
| 127                                       | 1   | 0.138 | 1 --> | 0       |
| 129                                       | 1   | 0.154 | 1 --> | 2       |
| 243                                       | 1   | 0.333 | 0 ==> | 1       |
| 263                                       | 1   | 0.222 | 0 ==> | 1       |
| node_77 --> Tonatia saurophila saurophila | 190 | 1     | 0.167 | 0 ==> 1 |
| 195                                       | 1   | 0.182 | 0 ==> | 1       |

|             |                                |    |       |         |         |
|-------------|--------------------------------|----|-------|---------|---------|
|             | 202                            | 1  | 0.182 | 1 ==> 0 |         |
| node_78 --> | Trachops cirrhosus cirrhosus 5 |    | 1     | 0.273   | 1 --> 2 |
|             | 14                             | 1  | 0.667 | 0 ==> 1 |         |
|             | 16                             | 1  | 0.222 | 1 ==> 2 |         |
|             | 26                             | 2  | 0.250 | 0 ==> 2 |         |
|             | 34                             | 1  | 0.158 | 0 ==> 1 |         |
|             | 58                             | 1  | 0.167 | 2 ==> 1 |         |
|             | 61                             | 1  | 0.154 | 1 ==> 0 |         |
|             | 66                             | 1  | 0.286 | 0 --> 1 |         |
|             | 71                             | 1  | 0.111 | 2 --> 1 |         |
|             | 78                             | 1  | 0.200 | 1 --> 0 |         |
|             | 85                             | 1  | 0.200 | 1 ==> 0 |         |
|             | 86                             | 1  | 0.400 | 0 ==> 1 |         |
|             | 87                             | 1  | 0.250 | 0 ==> 1 |         |
|             | 100                            | 1  | 0.333 | 0 ==> 3 |         |
|             | 103                            | 1  | 0.200 | 1 ==> 2 |         |
|             | 108                            | 1  | 0.333 | 0 ==> 1 |         |
|             | 111                            | 1  | 0.111 | 1 ==> 0 |         |
|             | 112                            | 1  | 0.125 | 1 ==> 2 |         |
|             | 120                            | 1  | 0.143 | 1 ==> 2 |         |
|             | 122                            | 1  | 0.250 | 3 ==> 4 |         |
|             | 124                            | 1  | 0.333 | 0 ==> 1 |         |
|             | 129                            | 1  | 0.154 | 1 --> 2 |         |
|             | 140                            | 1  | 0.222 | 2 ==> 1 |         |
|             | 152                            | 1  | 0.333 | 0 ==> 1 |         |
|             | 165                            | 1  | 0.125 | 1 ==> 2 |         |
|             | 177                            | 1  | 0.500 | 0 ==> 1 |         |
|             | 179                            | 1  | 0.333 | 1 --> 2 |         |
|             | 182                            | 1  | 0.200 | 0 ==> 1 |         |
|             | 192                            | 1  | 0.214 | 3 ==> 1 |         |
|             | 193                            | 1  | 0.200 | 1 ==> 0 |         |
|             | 203                            | 1  | 0.250 | 1 ==> 0 |         |
|             | 210                            | 1  | 0.200 | 2 ==> 1 |         |
|             | 220                            | 1  | 0.111 | 1 --> 0 |         |
|             | 223                            | 1  | 0.222 | 1 ==> 2 |         |
|             | 235                            | 1  | 0.250 | 1 ==> 2 |         |
|             | 236                            | 1  | 0.143 | 0 ==> 2 |         |
|             | 237                            | 1  | 0.333 | 1 ==> 2 |         |
|             | 267                            | 1  | 0.154 | 1 ==> 0 |         |
|             | 269                            | 1  | 0.222 | 0 --> 1 |         |
|             | 277                            | 1  | 0.091 | 1 ==> 0 |         |
|             | 278                            | 1  | 0.091 | 1 ==> 0 |         |
| node_84 --> | node_83                        | 11 | 1     | 0.250   | 1 --> 0 |
|             | 61                             | 1  | 0.154 | 1 --> 2 |         |
|             | 65                             | 1  | 0.200 | 1 ==> 0 |         |
|             | 66                             | 1  | 0.286 | 0 --> 1 |         |
|             | 123                            | 1  | 0.167 | 1 ==> 0 |         |
|             | 127                            | 1  | 0.138 | 1 --> 2 |         |
|             | 134                            | 1  | 0.200 | 1 --> 0 |         |
|             | 184                            | 1  | 0.143 | 1 --> 0 |         |
|             | 194                            | 2  | 0.143 | 2 --> 0 |         |

|                                      |     |       |       |     |     |   |
|--------------------------------------|-----|-------|-------|-----|-----|---|
| 195                                  | 1   | 0.182 | 0     | --> | 2   |   |
| 219                                  | 1   | 0.125 | 0     | ==> | 1   |   |
| 245                                  | 2   | 0.222 | 0     | --> | 2   |   |
| 247                                  | 1   | 0.200 | 1     | --> | 0   |   |
| 252                                  | 1   | 0.182 | 0     | --> | 1   |   |
| 260                                  | 1   | 0.250 | 1     | --> | 2   |   |
| 264                                  | 1   | 0.200 | 0     | --> | 1   |   |
| 269                                  | 2   | 0.222 | 0     | ==> | 2   |   |
| 274                                  | 1   | 0.250 | 2     | ==> | 1   |   |
| node_83 --> node_81                  | 13  | 1     | 0.273 | 3   | --> | 2 |
| 21                                   | 1   | 0.125 | 0     | ==> | 1   |   |
| 29                                   | 1   | 0.214 | 2     | ==> | 3   |   |
| 34                                   | 1   | 0.158 | 0     | ==> | 1   |   |
| 37                                   | 1   | 0.200 | 1     | ==> | 0   |   |
| 49                                   | 1   | 0.286 | 1     | --> | 2   |   |
| 50                                   | 2   | 0.400 | 2     | ==> | 0   |   |
| 55                                   | 1   | 0.167 | 0     | --> | 1   |   |
| 60                                   | 1   | 0.158 | 0     | --> | 1   |   |
| 63                                   | 1   | 0.125 | 0     | ==> | 1   |   |
| 105                                  | 1   | 0.133 | 1     | ==> | 2   |   |
| 110                                  | 1   | 0.143 | 1     | --> | 2   |   |
| 122                                  | 1   | 0.250 | 3     | --> | 2   |   |
| 131                                  | 1   | 0.444 | 2     | ==> | 1   |   |
| 139                                  | 3   | 0.227 | 5     | ==> | 2   |   |
| 140                                  | 1   | 0.222 | 2     | ==> | 1   |   |
| 159                                  | 1   | 0.250 | 0     | ==> | 1   |   |
| 160                                  | 1   | 0.111 | 0     | ==> | 1   |   |
| 167                                  | 1   | 0.154 | 1     | --> | 0   |   |
| 172                                  | 1   | 0.167 | 0     | ==> | 1   |   |
| 173                                  | 1   | 0.286 | 0     | --> | 1   |   |
| 178                                  | 1   | 0.250 | 0     | ==> | 1   |   |
| 180                                  | 1   | 0.500 | 0     | ==> | 1   |   |
| 182                                  | 1   | 0.200 | 0     | ==> | 1   |   |
| 192                                  | 1   | 0.214 | 3     | ==> | 0   |   |
| 206                                  | 1   | 0.286 | 2     | ==> | 1   |   |
| 253                                  | 1   | 0.278 | 1     | --> | 4   |   |
| 255                                  | 1   | 0.200 | 1     | --> | 0   |   |
| 271                                  | 1   | 0.200 | 1     | --> | 0   |   |
| 275                                  | 1   | 0.333 | 1     | --> | 2   |   |
| 280                                  | 1   | 0.125 | 2     | ==> | 1   |   |
| node_81 --> node_80                  | 106 | 2     | 0.107 | 1   | ==> | 3 |
| 112                                  | 1   | 0.125 | 1     | --> | 0   |   |
| 129                                  | 1   | 0.154 | 1     | --> | 0   |   |
| 165                                  | 1   | 0.125 | 1     | ==> | 0   |   |
| 203                                  | 1   | 0.250 | 1     | ==> | 0   |   |
| 235                                  | 1   | 0.250 | 1     | ==> | 0   |   |
| 236                                  | 1   | 0.143 | 0     | ==> | 1   |   |
| 259                                  | 1   | 0.125 | 0     | ==> | 1   |   |
| node_80 --> Anoura geoffroyi peruana | 1   | 0.100 | 1     | --> | 0   |   |
| 13                                   | 1   | 0.273 | 2     | --> | 1   |   |
| 25                                   | 2   | 0.200 | 2     | --> | 0   |   |

|                                    |    |       |       |     |       |
|------------------------------------|----|-------|-------|-----|-------|
| 40                                 | 3  | 0.231 | 3     | ==> | 0     |
| 41                                 | 1  | 1.000 | 0     | --> | 1     |
| 42                                 | 1  | 1.000 | 1     | --> | 0     |
| 56                                 | 1  | 0.250 | 0     | ==> | 1     |
| 63                                 | 1  | 0.125 | 1     | --> | 2     |
| 70                                 | 1  | 0.400 | 2     | ==> | 1     |
| 82                                 | 1  | 0.500 | 0     | ==> | 1     |
| 84                                 | 1  | 0.200 | 2     | ==> | 3     |
| 85                                 | 1  | 0.200 | 1     | ==> | 0     |
| 87                                 | 1  | 0.250 | 0     | ==> | 1     |
| 111                                | 1  | 0.111 | 1     | ==> | 0     |
| 114                                | 1  | 0.250 | 0     | --> | 1     |
| 128                                | 1  | 0.143 | 1     | --> | 0     |
| 131                                | 1  | 0.444 | 1     | ==> | 0     |
| 138                                | 1  | 1.000 | 1     | ==> | 0     |
| 140                                | 1  | 0.222 | 1     | --> | 0     |
| 144                                | 1  | 1.000 | 0     | ==> | 1     |
| 150                                | 1  | 0.200 | 0     | ==> | 1     |
| 164                                | 1  | 0.222 | 2     | --> | 1     |
| 170                                | 1  | 0.333 | 0     | --> | 1     |
| 173                                | 1  | 0.286 | 1     | ==> | 2     |
| 176                                | 1  | 0.400 | 0     | ==> | 1     |
| 186                                | 1  | 0.158 | 3     | ==> | 2     |
| 193                                | 1  | 0.200 | 1     | ==> | 0     |
| 202                                | 1  | 0.182 | 1     | ==> | 2     |
| 206                                | 1  | 0.286 | 1     | ==> | 0     |
| 210                                | 2  | 0.200 | 2     | ==> | 0     |
| 219                                | 1  | 0.125 | 1     | ==> | 0     |
| 244                                | 1  | 0.333 | 0     | ==> | 1     |
| 249                                | 1  | 0.111 | 0     | --> | 1     |
| 253                                | 1  | 0.278 | 4     | ==> | 3     |
| 263                                | 1  | 0.222 | 1     | ==> | 0     |
| 267                                | 1  | 0.154 | 1     | ==> | 0     |
| 278                                | 1  | 0.091 | 1     | ==> | 0     |
| node_80 --> node_79                | 12 | 1     | 0.455 | 0   | --> 1 |
| 23                                 | 1  | 0.133 | 0     | ==> | 1     |
| 26                                 | 1  | 0.250 | 0     | --> | 1     |
| 58                                 | 1  | 0.167 | 2     | ==> | 1     |
| 145                                | 1  | 0.667 | 0     | --> | 4     |
| 148                                | 1  | 0.143 | 2     | --> | 1     |
| 149                                | 1  | 0.333 | 0     | --> | 1     |
| 151                                | 1  | 0.400 | 0     | --> | 3     |
| 154                                | 1  | 0.143 | 0     | --> | 1     |
| 158                                | 1  | 0.200 | 0     | --> | 1     |
| 220                                | 1  | 0.111 | 1     | --> | 0     |
| 243                                | 1  | 0.333 | 0     | ==> | 1     |
| node_79 --> Phylloncyteris aphylla | 1  | 1     | 0.100 | 1   | --> 0 |
| 5                                  | 1  | 0.273 | 1     | ==> | 2     |
| 29                                 | 1  | 0.214 | 3     | ==> | 2     |
| 31                                 | 1  | 0.286 | 1     | ==> | 0     |
| 34                                 | 1  | 0.158 | 1     | ==> | 0     |

|                                       |    |       |   |     |   |
|---------------------------------------|----|-------|---|-----|---|
| 37                                    | 1  | 0.200 | 0 | ==> | 1 |
| 47                                    | 1  | 0.200 | 1 | ==> | 2 |
| 53                                    | 1  | 0.125 | 0 | ==> | 1 |
| 54                                    | 1  | 0.200 | 1 | ==> | 0 |
| 58                                    | 1  | 0.167 | 1 | ==> | 0 |
| 63                                    | 1  | 0.125 | 1 | ==> | 0 |
| 65                                    | 1  | 0.200 | 0 | ==> | 1 |
| 66                                    | 1  | 0.286 | 1 | ==> | 0 |
| 68                                    | 1  | 0.500 | 0 | ==> | 1 |
| 75                                    | 1  | 0.333 | 0 | ==> | 1 |
| 76                                    | 1  | 0.500 | 0 | ==> | 1 |
| 81                                    | 2  | 0.500 | 1 | ==> | 3 |
| 93                                    | 1  | 0.200 | 0 | ==> | 1 |
| 98                                    | 1  | 0.286 | 4 | --> | 1 |
| 102                                   | 1  | 0.200 | 2 | ==> | 1 |
| 110                                   | 1  | 0.143 | 2 | ==> | 1 |
| 114                                   | 1  | 0.250 | 0 | --> | 1 |
| 120                                   | 1  | 0.143 | 1 | --> | 0 |
| 127                                   | 2  | 0.138 | 2 | ==> | 0 |
| 133                                   | 1  | 0.500 | 0 | --> | 1 |
| 139                                   | 2  | 0.227 | 2 | --> | 0 |
| 142                                   | 1  | 0.500 | 0 | --> | 1 |
| 153                                   | 1  | 0.222 | 1 | ==> | 2 |
| 172                                   | 1  | 0.167 | 1 | ==> | 0 |
| 174                                   | 1  | 0.167 | 0 | ==> | 1 |
| 192                                   | 1  | 0.214 | 0 | ==> | 3 |
| 202                                   | 1  | 0.182 | 1 | ==> | 0 |
| 204                                   | 1  | 0.500 | 1 | ==> | 2 |
| 207                                   | 1  | 0.100 | 0 | ==> | 1 |
| 211                                   | 1  | 0.500 | 0 | ==> | 1 |
| 217                                   | 1  | 0.286 | 2 | ==> | 1 |
| 221                                   | 1  | 0.143 | 1 | ==> | 0 |
| 223                                   | 1  | 0.222 | 1 | ==> | 0 |
| 233                                   | 1  | 0.286 | 1 | ==> | 2 |
| 234                                   | 1  | 0.200 | 0 | ==> | 1 |
| 237                                   | 1  | 0.333 | 1 | ==> | 0 |
| 238                                   | 1  | 0.500 | 0 | ==> | 1 |
| 243                                   | 1  | 0.333 | 1 | ==> | 2 |
| 252                                   | 1  | 0.182 | 1 | ==> | 2 |
| 253                                   | 1  | 0.278 | 4 | --> | 2 |
| 259                                   | 1  | 0.125 | 1 | ==> | 2 |
| 262                                   | 2  | 0.375 | 0 | ==> | 2 |
| 264                                   | 1  | 0.200 | 1 | ==> | 2 |
| 272                                   | 1  | 0.500 | 0 | --> | 1 |
| 274                                   | 1  | 0.250 | 1 | --> | 0 |
| 277                                   | 1  | 0.091 | 1 | --> | 0 |
| node_79 --> Leptonycteris yerbabuenae | 13 |       |   |     |   |
| 19                                    | 1  | 0.200 | 0 | ==> | 1 |
| 23                                    | 1  | 0.133 | 1 | ==> | 2 |
| 26                                    | 1  | 0.250 | 1 | ==> | 2 |
| 31                                    | 1  | 0.286 | 1 | ==> | 2 |
|                                       | 1  | 0.273 | 2 | --> | 1 |

|                                     |   |       |       |   |
|-------------------------------------|---|-------|-------|---|
| 34                                  | 1 | 0.158 | 1 ==> | 2 |
| 36                                  | 1 | 0.333 | 1 --> | 0 |
| 63                                  | 1 | 0.125 | 1 --> | 2 |
| 84                                  | 1 | 0.200 | 2 --> | 0 |
| 97                                  | 1 | 0.125 | 0 --> | 1 |
| 98                                  | 1 | 0.286 | 4 --> | 3 |
| 110                                 | 2 | 0.143 | 2 ==> | 4 |
| 115                                 | 1 | 0.333 | 1 --> | 0 |
| 118                                 | 1 | 0.375 | 4 ==> | 2 |
| 121                                 | 1 | 0.500 | 0 ==> | 1 |
| 122                                 | 2 | 0.250 | 2 ==> | 0 |
| 127                                 | 2 | 0.138 | 2 ==> | 4 |
| 130                                 | 1 | 0.333 | 0 ==> | 1 |
| 163                                 | 1 | 0.200 | 0 ==> | 1 |
| 164                                 | 1 | 0.222 | 2 --> | 1 |
| 166                                 | 1 | 1.000 | 0 ==> | 1 |
| 170                                 | 1 | 0.333 | 0 --> | 1 |
| 204                                 | 1 | 0.500 | 1 ==> | 0 |
| 206                                 | 1 | 0.286 | 1 ==> | 2 |
| 222                                 | 1 | 0.500 | 0 ==> | 1 |
| 250                                 | 1 | 0.222 | 1 ==> | 2 |
| 265                                 | 1 | 0.500 | 0 ==> | 1 |
| node_81 --> Lonchophylla thomasi 17 |   |       |       |   |
| 24                                  | 1 | 0.100 | 1 --> | 0 |
| 25                                  | 2 | 0.200 | 2 --> | 0 |
| 31                                  | 1 | 0.286 | 1 ==> | 2 |
| 34                                  | 1 | 0.158 | 1 ==> | 2 |
| 53                                  | 1 | 0.125 | 0 ==> | 1 |
| 54                                  | 1 | 0.200 | 1 ==> | 0 |
| 60                                  | 1 | 0.158 | 1 ==> | 2 |
| 71                                  | 1 | 0.111 | 2 --> | 1 |
| 72                                  | 1 | 1.000 | 0 ==> | 1 |
| 110                                 | 2 | 0.143 | 2 ==> | 4 |
| 117                                 | 1 | 0.167 | 1 --> | 0 |
| 120                                 | 1 | 0.143 | 1 --> | 0 |
| 127                                 | 2 | 0.138 | 2 ==> | 4 |
| 139                                 | 1 | 0.227 | 2 --> | 1 |
| 140                                 | 1 | 0.222 | 1 --> | 0 |
| 152                                 | 1 | 0.333 | 0 --> | 1 |
| 183                                 | 1 | 1.000 | 1 ==> | 0 |
| 187                                 | 1 | 0.158 | 1 --> | 2 |
| 249                                 | 1 | 0.111 | 0 --> | 1 |
| 250                                 | 1 | 0.222 | 1 ==> | 2 |
| node_83 --> node_82                 |   |       |       |   |
| 51                                  | 1 | 0.167 | 0 ==> | 1 |
| 59                                  | 1 | 0.125 | 0 ==> | 1 |
| 69                                  | 1 | 0.154 | 1 ==> | 0 |
| 71                                  | 1 | 0.111 | 2 --> | 1 |
| 81                                  | 2 | 0.500 | 1 ==> | 3 |
| 84                                  | 1 | 0.200 | 2 --> | 0 |
| 86                                  | 1 | 0.400 | 0 ==> | 1 |
| 93                                  | 1 | 0.200 | 0 --> | 1 |

|                                             |   |       |         |
|---------------------------------------------|---|-------|---------|
| 127                                         | 1 | 0.138 | 2 --> 3 |
| 217                                         | 1 | 0.286 | 2 ==> 1 |
| 220                                         | 1 | 0.111 | 1 --> 0 |
| 227                                         | 1 | 0.286 | 0 ==> 1 |
| 250                                         | 1 | 0.222 | 1 ==> 0 |
| node_82 --> <i>Carollia perspicillata</i> 2 |   |       |         |
| 5                                           | 1 | 0.273 | 1 --> 0 |
| 17                                          | 1 | 0.200 | 0 ==> 1 |
| 31                                          | 1 | 0.286 | 1 --> 0 |
| 38                                          | 1 | 0.250 | 0 ==> 1 |
| 49                                          | 1 | 0.286 | 1 --> 2 |
| 55                                          | 1 | 0.167 | 0 --> 1 |
| 56                                          | 1 | 0.250 | 0 ==> 1 |
| 57                                          | 2 | 0.286 | 0 ==> 2 |
| 86                                          | 1 | 0.400 | 1 ==> 2 |
| 98                                          | 1 | 0.286 | 4 --> 1 |
| 102                                         | 1 | 0.200 | 2 --> 1 |
| 103                                         | 1 | 0.200 | 1 --> 0 |
| 105                                         | 1 | 0.133 | 1 ==> 0 |
| 110                                         | 3 | 0.143 | 1 ==> 4 |
| 118                                         | 1 | 0.375 | 4 --> 1 |
| 119                                         | 1 | 0.333 | 0 --> 1 |
| 127                                         | 1 | 0.138 | 3 ==> 4 |
| 132                                         | 1 | 0.250 | 0 --> 1 |
| 142                                         | 1 | 0.500 | 0 ==> 1 |
| 146                                         | 1 | 0.250 | 1 --> 0 |
| 153                                         | 1 | 0.222 | 1 ==> 0 |
| 158                                         | 1 | 0.200 | 0 ==> 1 |
| 162                                         | 1 | 0.364 | 2 --> 1 |
| 169                                         | 1 | 0.200 | 0 ==> 1 |
| 176                                         | 1 | 0.400 | 0 --> 1 |
| 186                                         | 1 | 0.158 | 3 --> 2 |
| 202                                         | 1 | 0.182 | 1 ==> 0 |
| 207                                         | 1 | 0.100 | 0 ==> 1 |
| 210                                         | 1 | 0.200 | 2 ==> 1 |
| 214                                         | 1 | 0.333 | 3 --> 2 |
| 240                                         | 1 | 0.250 | 2 --> 1 |
| 243                                         | 1 | 0.333 | 0 ==> 1 |
| 251                                         | 1 | 0.333 | 0 ==> 1 |
| 253                                         | 1 | 0.278 | 1 --> 2 |
| 254                                         | 1 | 0.182 | 2 ==> 1 |
| 255                                         | 1 | 0.200 | 1 --> 0 |
| 262                                         | 2 | 0.375 | 0 ==> 2 |
| 276                                         | 1 | 0.500 | 0 ==> 1 |
| node_82 --> <i>Artibeus jamaicensis</i> 1   |   |       |         |
| 5                                           | 1 | 0.273 | 1 --> 2 |
| 12                                          | 1 | 0.455 | 0 ==> 1 |
| 13                                          | 1 | 0.273 | 3 --> 2 |
| 16                                          | 1 | 0.222 | 1 ==> 0 |
| 23                                          | 1 | 0.133 | 0 ==> 1 |
| 24                                          | 1 | 0.100 | 1 --> 0 |

|     |   |       |         |
|-----|---|-------|---------|
| 32  | 1 | 1.000 | 1 ==> 2 |
| 47  | 1 | 0.200 | 1 ==> 2 |
| 58  | 1 | 0.167 | 2 ==> 3 |
| 60  | 2 | 0.158 | 0 ==> 2 |
| 64  | 1 | 0.667 | 1 ==> 2 |
| 66  | 1 | 0.286 | 1 ==> 2 |
| 67  | 1 | 0.143 | 2 ==> 1 |
| 75  | 1 | 0.333 | 0 ==> 1 |
| 78  | 1 | 0.200 | 1 ==> 2 |
| 98  | 1 | 0.286 | 4 --> 0 |
| 101 | 1 | 0.500 | 0 ==> 1 |
| 104 | 1 | 1.000 | 0 ==> 1 |
| 106 | 1 | 0.107 | 1 ==> 0 |
| 107 | 1 | 0.333 | 1 ==> 0 |
| 110 | 1 | 0.143 | 1 ==> 0 |
| 112 | 1 | 0.125 | 1 --> 2 |
| 114 | 1 | 0.250 | 0 ==> 1 |
| 118 | 1 | 0.375 | 4 --> 0 |
| 121 | 1 | 0.500 | 0 ==> 1 |
| 122 | 3 | 0.250 | 3 ==> 0 |
| 126 | 1 | 0.500 | 1 ==> 0 |
| 128 | 1 | 0.143 | 1 --> 0 |
| 131 | 2 | 0.444 | 2 ==> 4 |
| 133 | 1 | 0.500 | 0 ==> 1 |
| 145 | 1 | 0.667 | 0 ==> 2 |
| 148 | 1 | 0.143 | 2 --> 1 |
| 151 | 1 | 0.400 | 0 ==> 1 |
| 162 | 1 | 0.364 | 2 --> 3 |
| 165 | 1 | 0.125 | 1 ==> 0 |
| 167 | 1 | 0.154 | 1 --> 0 |
| 174 | 1 | 0.167 | 0 ==> 1 |
| 192 | 1 | 0.214 | 3 ==> 1 |
| 193 | 1 | 0.200 | 1 ==> 0 |
| 195 | 1 | 0.182 | 2 ==> 1 |
| 196 | 1 | 0.200 | 1 --> 0 |
| 221 | 1 | 0.143 | 1 ==> 0 |
| 223 | 1 | 0.222 | 1 ==> 0 |
| 233 | 1 | 0.286 | 1 ==> 2 |
| 235 | 1 | 0.250 | 1 ==> 0 |
| 237 | 1 | 0.333 | 1 ==> 0 |
| 238 | 1 | 0.500 | 0 ==> 1 |
| 244 | 1 | 0.333 | 0 ==> 1 |
| 252 | 1 | 0.182 | 1 ==> 2 |
| 253 | 1 | 0.278 | 1 --> 0 |
| 259 | 1 | 0.125 | 0 ==> 1 |
| 263 | 1 | 0.222 | 1 ==> 2 |
| 264 | 1 | 0.200 | 1 ==> 2 |
| 266 | 1 | 0.500 | 0 ==> 1 |
| 267 | 1 | 0.154 | 1 ==> 2 |
| 268 | 1 | 0.500 | 0 ==> 1 |
| 271 | 1 | 0.200 | 1 ==> 2 |

|                                     |     |   |       |   |     |   |
|-------------------------------------|-----|---|-------|---|-----|---|
|                                     | 272 | 1 | 0.500 | 0 | ==> | 1 |
|                                     | 274 | 1 | 0.250 | 1 | ==> | 0 |
|                                     | 277 | 1 | 0.091 | 1 | --> | 0 |
| node_70 --> node_49                 | 5   | 1 | 0.273 | 0 | --> | 2 |
|                                     | 84  | 1 | 0.200 | 2 | --> | 0 |
|                                     | 116 | 1 | 0.167 | 0 | ==> | 1 |
|                                     | 135 | 1 | 0.200 | 0 | ==> | 1 |
|                                     | 160 | 1 | 0.111 | 0 | ==> | 1 |
|                                     | 250 | 1 | 0.222 | 1 | ==> | 0 |
|                                     | 275 | 1 | 0.333 | 1 | --> | 2 |
| node_49 --> Mormoops blainvillei 11 |     | 1 | 0.250 | 1 | ==> | 0 |
|                                     | 16  | 1 | 0.222 | 0 | --> | 1 |
|                                     | 21  | 1 | 0.125 | 0 | ==> | 1 |
|                                     | 23  | 1 | 0.133 | 1 | ==> | 2 |
|                                     | 34  | 1 | 0.158 | 0 | ==> | 1 |
|                                     | 47  | 1 | 0.200 | 1 | ==> | 0 |
|                                     | 55  | 1 | 0.167 | 0 | ==> | 1 |
|                                     | 58  | 1 | 0.167 | 2 | ==> | 3 |
|                                     | 67  | 1 | 0.143 | 1 | --> | 2 |
|                                     | 69  | 1 | 0.154 | 1 | --> | 0 |
|                                     | 70  | 1 | 0.400 | 2 | ==> | 1 |
|                                     | 97  | 1 | 0.125 | 0 | --> | 1 |
|                                     | 100 | 1 | 0.333 | 0 | ==> | 3 |
|                                     | 112 | 1 | 0.125 | 1 | ==> | 0 |
|                                     | 120 | 1 | 0.143 | 1 | --> | 2 |
|                                     | 122 | 1 | 0.250 | 3 | --> | 2 |
|                                     | 124 | 1 | 0.333 | 0 | ==> | 1 |
|                                     | 127 | 1 | 0.138 | 1 | --> | 0 |
|                                     | 129 | 1 | 0.154 | 1 | ==> | 0 |
|                                     | 165 | 1 | 0.125 | 1 | --> | 2 |
|                                     | 182 | 1 | 0.200 | 0 | ==> | 1 |
|                                     | 184 | 1 | 0.143 | 1 | --> | 0 |
|                                     | 190 | 1 | 0.167 | 0 | --> | 1 |
|                                     | 195 | 1 | 0.182 | 0 | --> | 1 |
|                                     | 208 | 1 | 0.250 | 0 | --> | 1 |
|                                     | 210 | 1 | 0.200 | 2 | --> | 1 |
|                                     | 232 | 1 | 0.200 | 1 | ==> | 0 |
|                                     | 245 | 1 | 0.222 | 0 | --> | 1 |
|                                     | 247 | 1 | 0.200 | 1 | ==> | 0 |
|                                     | 253 | 1 | 0.278 | 1 | ==> | 2 |
|                                     | 267 | 1 | 0.154 | 1 | --> | 0 |
|                                     | 269 | 1 | 0.222 | 0 | ==> | 1 |
|                                     | 278 | 1 | 0.091 | 1 | --> | 0 |
|                                     | 279 | 1 | 0.500 | 1 | ==> | 0 |
|                                     | 280 | 1 | 0.125 | 2 | ==> | 1 |
| node_49 --> node_48                 | 18  | 1 | 0.167 | 0 | --> | 1 |
|                                     | 26  | 1 | 0.250 | 0 | ==> | 1 |
|                                     | 59  | 1 | 0.125 | 1 | --> | 0 |
|                                     | 63  | 1 | 0.125 | 0 | ==> | 1 |
|                                     | 96  | 1 | 0.333 | 0 | ==> | 1 |
|                                     | 102 | 1 | 0.200 | 2 | ==> | 1 |

|     |   |       |   |       |
|-----|---|-------|---|-------|
| 103 | 1 | 0.200 | 1 | ==> 0 |
| 106 | 2 | 0.107 | 1 | ==> 3 |
| 111 | 1 | 0.111 | 0 | --> 1 |
| 112 | 1 | 0.125 | 1 | ==> 2 |
| 118 | 1 | 0.375 | 4 | ==> 2 |
| 129 | 1 | 0.154 | 1 | ==> 2 |
| 148 | 2 | 0.143 | 2 | ==> 0 |
| 153 | 1 | 0.222 | 1 | ==> 0 |
| 158 | 1 | 0.200 | 1 | --> 0 |
| 173 | 1 | 0.286 | 1 | --> 0 |
| 175 | 1 | 0.143 | 1 | ==> 2 |
| 179 | 1 | 0.333 | 1 | ==> 2 |
| 186 | 1 | 0.158 | 3 | ==> 4 |
| 187 | 2 | 0.158 | 1 | ==> 3 |
| 188 | 1 | 0.250 | 0 | ==> 1 |
| 194 | 1 | 0.143 | 2 | ==> 1 |
| 217 | 1 | 0.286 | 2 | ==> 1 |
| 221 | 1 | 0.143 | 1 | ==> 0 |
| 226 | 1 | 0.111 | 0 | ==> 1 |

node\_48 --> Pteronotus davyi 16      1 0.222 0 --> 1

|     |   |       |   |       |
|-----|---|-------|---|-------|
| 53  | 1 | 0.125 | 0 | ==> 1 |
| 67  | 1 | 0.143 | 1 | ==> 0 |
| 69  | 1 | 0.154 | 1 | --> 0 |
| 97  | 1 | 0.125 | 0 | --> 1 |
| 110 | 1 | 0.143 | 1 | ==> 0 |
| 122 | 1 | 0.250 | 3 | --> 2 |
| 127 | 1 | 0.138 | 1 | --> 0 |
| 139 | 1 | 0.227 | 1 | ==> 0 |
| 165 | 1 | 0.125 | 1 | --> 2 |
| 190 | 1 | 0.167 | 0 | --> 1 |
| 210 | 1 | 0.200 | 2 | --> 1 |
| 220 | 1 | 0.111 | 1 | ==> 0 |
| 236 | 1 | 0.143 | 0 | --> 2 |
| 245 | 1 | 0.222 | 0 | --> 1 |
| 254 | 1 | 0.182 | 2 | ==> 1 |
| 267 | 1 | 0.154 | 1 | --> 0 |
| 270 | 1 | 0.333 | 0 | ==> 1 |

node\_48 --> Pteronotus parnellii 19      1 0.200 0 ==> 1

|     |   |       |   |       |
|-----|---|-------|---|-------|
| 23  | 1 | 0.133 | 1 | ==> 0 |
| 77  | 1 | 0.200 | 0 | ==> 1 |
| 98  | 1 | 0.286 | 4 | ==> 2 |
| 132 | 1 | 0.250 | 0 | ==> 1 |
| 152 | 1 | 0.333 | 1 | ==> 0 |
| 161 | 1 | 0.167 | 0 | ==> 1 |
| 165 | 1 | 0.125 | 1 | ==> 0 |
| 177 | 1 | 0.500 | 0 | ==> 1 |
| 192 | 1 | 0.214 | 3 | ==> 1 |
| 194 | 1 | 0.143 | 1 | ==> 0 |
| 195 | 1 | 0.182 | 0 | --> 1 |
| 206 | 1 | 0.286 | 2 | ==> 1 |
| 208 | 1 | 0.250 | 0 | --> 1 |

|                     |    |       |       |     |     |   |
|---------------------|----|-------|-------|-----|-----|---|
| 215                 | 1  | 0.143 | 0     | ==> | 1   |   |
| 236                 | 1  | 0.143 | 0     | --> | 1   |   |
| 259                 | 1  | 0.125 | 0     | ==> | 1   |   |
| 260                 | 1  | 0.250 | 1     | ==> | 0   |   |
| 271                 | 1  | 0.200 | 1     | ==> | 0   |   |
| 274                 | 1  | 0.250 | 2     | ==> | 1   |   |
| 278                 | 1  | 0.091 | 1     | --> | 0   |   |
| node_69 --> node_54 | 18 | 1     | 0.167 | 0   | --> | 1 |
| 83                  | 1  | 0.200 | 0     | ==> | 1   |   |
| 97                  | 1  | 0.125 | 0     | --> | 1   |   |
| 103                 | 1  | 0.200 | 1     | ==> | 0   |   |
| 129                 | 1  | 0.154 | 1     | ==> | 2   |   |
| 172                 | 1  | 0.167 | 0     | ==> | 1   |   |
| 186                 | 1  | 0.158 | 3     | ==> | 2   |   |
| node_54 --> node_52 | 29 | 1     | 0.214 | 1   | --> | 0 |
| 165                 | 1  | 0.125 | 1     | --> | 0   |   |
| 245                 | 1  | 0.222 | 0     | ==> | 1   |   |
| 260                 | 1  | 0.250 | 0     | --> | 1   |   |
| 269                 | 1  | 0.222 | 0     | ==> | 1   |   |
| node_52 --> node_50 | 1  | 1     | 0.100 | 0   | --> | 1 |
| 9                   | 1  | 0.250 | 0     | --> | 1   |   |
| 13                  | 1  | 0.273 | 2     | ==> | 3   |   |
| 46                  | 1  | 0.250 | 0     | ==> | 1   |   |
| 58                  | 1  | 0.167 | 2     | --> | 3   |   |
| 60                  | 1  | 0.158 | 2     | --> | 1   |   |
| 67                  | 1  | 0.143 | 1     | ==> | 0   |   |
| 74                  | 1  | 0.200 | 1     | --> | 0   |   |
| 78                  | 1  | 0.200 | 1     | ==> | 0   |   |
| 85                  | 1  | 0.200 | 1     | ==> | 0   |   |
| 105                 | 1  | 0.133 | 1     | --> | 0   |   |
| 108                 | 1  | 0.333 | 0     | ==> | 1   |   |
| 110                 | 1  | 0.143 | 2     | ==> | 1   |   |
| 112                 | 1  | 0.125 | 1     | --> | 2   |   |
| 123                 | 1  | 0.167 | 1     | --> | 0   |   |
| 124                 | 1  | 0.333 | 0     | ==> | 1   |   |
| 127                 | 1  | 0.138 | 2     | ==> | 1   |   |
| 139                 | 1  | 0.227 | 1     | ==> | 2   |   |
| 145                 | 1  | 0.667 | 0     | ==> | 1   |   |
| 148                 | 1  | 0.143 | 2     | ==> | 1   |   |
| 150                 | 1  | 0.200 | 0     | ==> | 1   |   |
| 158                 | 1  | 0.200 | 1     | ==> | 0   |   |
| 160                 | 1  | 0.111 | 0     | ==> | 1   |   |
| 161                 | 1  | 0.167 | 0     | ==> | 1   |   |
| 174                 | 1  | 0.167 | 0     | ==> | 1   |   |
| 189                 | 1  | 1.000 | 1     | ==> | 0   |   |
| 192                 | 1  | 0.214 | 3     | --> | 1   |   |
| 193                 | 1  | 0.200 | 1     | ==> | 0   |   |
| 195                 | 1  | 0.182 | 0     | ==> | 1   |   |
| 198                 | 1  | 0.333 | 0     | ==> | 1   |   |
| 200                 | 1  | 0.500 | 0     | --> | 1   |   |
| 207                 | 1  | 0.100 | 0     | --> | 1   |   |

|                                     |   |       |       |     |     |   |
|-------------------------------------|---|-------|-------|-----|-----|---|
| 217                                 | 1 | 0.286 | 2     | ==> | 1   |   |
| 221                                 | 1 | 0.143 | 1     | --> | 0   |   |
| 222                                 | 1 | 0.500 | 0     | ==> | 1   |   |
| 223                                 | 1 | 0.222 | 1     | ==> | 2   |   |
| 224                                 | 1 | 1.000 | 0     | --> | 1   |   |
| 231                                 | 1 | 0.333 | 0     | ==> | 1   |   |
| 250                                 | 1 | 0.222 | 1     | ==> | 0   |   |
| 253                                 | 1 | 0.278 | 1     | --> | 0   |   |
| 259                                 | 1 | 0.125 | 0     | --> | 1   |   |
| 261                                 | 1 | 1.000 | 0     | ==> | 1   |   |
| 271                                 | 1 | 0.200 | 1     | ==> | 0   |   |
| 277                                 | 1 | 0.091 | 1     | --> | 0   |   |
| node_50 --> Noctilio albiventris 23 |   |       |       |     |     |   |
| 62                                  | 1 | 0.667 | 0     | ==> | 1   |   |
| 90                                  | 1 | 0.500 | 1     | ==> | 0   |   |
| 107                                 | 1 | 0.333 | 1     | ==> | 0   |   |
| 111                                 | 1 | 0.111 | 0     | ==> | 1   |   |
| 126                                 | 1 | 0.500 | 1     | ==> | 0   |   |
| 128                                 | 1 | 0.143 | 0     | ==> | 1   |   |
| 197                                 | 1 | 0.333 | 0     | ==> | 1   |   |
| 219                                 | 1 | 0.125 | 0     | ==> | 1   |   |
| 236                                 | 1 | 0.143 | 0     | ==> | 2   |   |
| 247                                 | 1 | 0.200 | 1     | ==> | 0   |   |
| 259                                 | 1 | 0.125 | 1     | ==> | 2   |   |
| node_50 --> Noctilio leporinus 109  |   |       |       |     |     |   |
| 110                                 | 1 | 0.143 | 1     | ==> | 0   |   |
| 122                                 | 1 | 0.250 | 3     | --> | 2   |   |
| 125                                 | 1 | 0.500 | 0     | ==> | 1   |   |
| node_52 --> node_51                 |   |       |       |     |     |   |
| 2                                   | 2 | 1     | 0.167 | 0   | ==> | 1 |
| 13                                  | 1 | 0.273 | 2     | ==> | 1   |   |
| 21                                  | 1 | 0.125 | 0     | ==> | 1   |   |
| 24                                  | 1 | 0.100 | 1     | --> | 0   |   |
| 59                                  | 1 | 0.125 | 1     | ==> | 0   |   |
| 61                                  | 1 | 0.154 | 1     | ==> | 0   |   |
| 65                                  | 1 | 0.200 | 1     | ==> | 0   |   |
| 67                                  | 1 | 0.143 | 1     | --> | 2   |   |
| 92                                  | 1 | 0.250 | 0     | ==> | 1   |   |
| 96                                  | 1 | 0.333 | 0     | --> | 1   |   |
| 110                                 | 2 | 0.143 | 2     | ==> | 4   |   |
| 116                                 | 1 | 0.167 | 0     | ==> | 1   |   |
| 122                                 | 1 | 0.250 | 3     | --> | 2   |   |
| 127                                 | 2 | 0.138 | 2     | ==> | 4   |   |
| 155                                 | 1 | 0.200 | 1     | --> | 0   |   |
| 158                                 | 1 | 0.200 | 1     | ==> | 2   |   |
| 162                                 | 1 | 0.364 | 2     | ==> | 0   |   |
| 163                                 | 1 | 0.200 | 0     | --> | 1   |   |
| 164                                 | 1 | 0.222 | 2     | ==> | 1   |   |
| 175                                 | 1 | 0.143 | 1     | --> | 2   |   |
| 202                                 | 1 | 0.182 | 0     | --> | 1   |   |
| 205                                 | 1 | 1.000 | 0     | --> | 1   |   |
| 215                                 | 1 | 0.143 | 1     | ==> | 0   |   |

|                                        |   |       |   |     |                   |
|----------------------------------------|---|-------|---|-----|-------------------|
| 220                                    | 1 | 0.111 | 0 | --> | 1                 |
| 226                                    | 1 | 0.111 | 0 | --> | 1                 |
| 240                                    | 1 | 0.250 | 2 | ==> | 1                 |
| 242                                    | 1 | 0.333 | 1 | --> | 2                 |
| 264                                    | 1 | 0.200 | 0 | ==> | 1                 |
| 274                                    | 1 | 0.250 | 2 | ==> | 1                 |
| 278                                    | 1 | 0.091 | 1 | --> | 0                 |
| node_51 --> Furipterus horrens 23      |   |       |   |     | 1 0.133 1 --> 2   |
| 34                                     | 3 | 0.158 | 0 | ==> | 3                 |
| 35                                     | 1 | 0.500 | 0 | --> | 1                 |
| 55                                     | 1 | 0.167 | 0 | ==> | 1                 |
| 63                                     | 2 | 0.125 | 0 | ==> | 2                 |
| 69                                     | 1 | 0.154 | 1 | ==> | 2                 |
| 77                                     | 1 | 0.200 | 0 | ==> | 1                 |
| 100                                    | 1 | 0.333 | 0 | --> | 1                 |
| 106                                    | 1 | 0.107 | 1 | ==> | 0                 |
| 131                                    | 1 | 0.444 | 1 | ==> | 0                 |
| 135                                    | 1 | 0.200 | 0 | ==> | 1                 |
| 143                                    | 1 | 0.200 | 0 | ==> | 1                 |
| 156                                    | 1 | 0.500 | 1 | --> | 2                 |
| 172                                    | 1 | 0.167 | 1 | ==> | 0                 |
| 187                                    | 1 | 0.158 | 1 | --> | 2                 |
| 192                                    | 1 | 0.214 | 3 | --> | 0                 |
| 196                                    | 1 | 0.200 | 0 | --> | 1                 |
| 227                                    | 1 | 0.286 | 0 | ==> | 1                 |
| 232                                    | 1 | 0.200 | 1 | ==> | 0                 |
| 236                                    | 1 | 0.143 | 0 | ==> | 1                 |
| 252                                    | 1 | 0.182 | 0 | ==> | 1                 |
| 253                                    | 1 | 0.278 | 1 | --> | 0                 |
| 259                                    | 1 | 0.125 | 0 | --> | 1                 |
| 267                                    | 1 | 0.154 | 1 | --> | 0                 |
| 280                                    | 1 | 0.125 | 2 | ==> | 1                 |
| node_51 --> Amorphochilus schnablui 23 |   |       |   |     | 1 0.133 1 ==> 0   |
| 60                                     | 1 | 0.158 | 2 | --> | 1                 |
| 69                                     | 1 | 0.154 | 1 | ==> | 0                 |
| 74                                     | 1 | 0.200 | 1 | --> | 0                 |
| 83                                     | 1 | 0.200 | 1 | ==> | 0                 |
| 100                                    | 1 | 0.333 | 0 | --> | 3                 |
| 103                                    | 1 | 0.200 | 0 | ==> | 1                 |
| 105                                    | 1 | 0.133 | 1 | --> | 0                 |
| 120                                    | 1 | 0.143 | 0 | --> | 1                 |
| 123                                    | 1 | 0.167 | 1 | --> | 0                 |
| 186                                    | 1 | 0.158 | 2 | ==> | 1                 |
| 192                                    | 1 | 0.214 | 3 | --> | 2                 |
| 277                                    | 1 | 0.091 | 1 | --> | 0                 |
| 279                                    | 1 | 0.500 | 1 | ==> | 0                 |
| node_54 --> node_53                    |   |       |   |     | 1 1 0.100 0 --> 1 |
| 24                                     | 1 | 0.100 | 1 | --> | 0                 |
| 25                                     | 1 | 0.200 | 2 | ==> | 3                 |
| 40                                     | 3 | 0.231 | 3 | ==> | 0                 |
| 51                                     | 1 | 0.167 | 0 | ==> | 1                 |

|                                    |   |       |       |      |
|------------------------------------|---|-------|-------|------|
| 58                                 | 1 | 0.167 | 2 --> | 3    |
| 63                                 | 1 | 0.125 | 0 ==> | 1    |
| 91                                 | 1 | 1.000 | 1 ==> | 0    |
| 96                                 | 1 | 0.333 | 0 --> | 1    |
| 105                                | 1 | 0.133 | 1 ==> | 2    |
| 108                                | 1 | 0.333 | 0 ==> | 2    |
| 120                                | 2 | 0.143 | 0 ==> | 2    |
| 124                                | 1 | 0.333 | 0 ==> | 2    |
| 154                                | 1 | 0.143 | 0 ==> | 1    |
| 155                                | 1 | 0.200 | 1 --> | 0    |
| 156                                | 1 | 0.500 | 1 --> | 2    |
| 162                                | 1 | 0.364 | 2 ==> | 1    |
| 163                                | 1 | 0.200 | 0 --> | 1    |
| 184                                | 1 | 0.143 | 1 --> | 0    |
| 187                                | 1 | 0.158 | 1 --> | 2    |
| 196                                | 1 | 0.200 | 0 --> | 1    |
| 210                                | 1 | 0.200 | 2 ==> | 1    |
| 221                                | 1 | 0.143 | 1 ==> | 2    |
| 226                                | 1 | 0.111 | 0 --> | 1    |
| 232                                | 1 | 0.200 | 1 ==> | 0    |
| 242                                | 1 | 0.333 | 1 --> | 2    |
| 249                                | 1 | 0.111 | 0 ==> | 1    |
| 252                                | 1 | 0.182 | 0 ==> | 1    |
| 267                                | 1 | 0.154 | 1 --> | 0    |
| node_53 --> Thyroptera discifera 9 |   |       |       |      |
| 56                                 | 1 | 0.250 | 0 ==> | 1    |
| 57                                 | 1 | 0.286 | 0 ==> | 1    |
| 67                                 | 1 | 0.143 | 1 --> | {02} |
| 100                                | 1 | 0.333 | 0 --> | 2    |
| 106                                | 2 | 0.107 | 1 ==> | 3    |
| 110                                | 1 | 0.143 | 2 ==> | 3    |
| 116                                | 1 | 0.167 | 0 ==> | 1    |
| 123                                | 1 | 0.167 | 1 ==> | 2    |
| 127                                | 1 | 0.138 | 2 ==> | 3    |
| 178                                | 1 | 0.250 | 0 ==> | 1    |
| 180                                | 1 | 0.500 | 0 ==> | 1    |
| 186                                | 1 | 0.158 | 2 ==> | 1    |
| 190                                | 1 | 0.167 | 0 ==> | 1    |
| 192                                | 1 | 0.214 | 3 --> | 2    |
| 204                                | 1 | 0.500 | 1 ==> | 2    |
| 214                                | 3 | 0.333 | 3 ==> | 0    |
| 220                                | 2 | 0.111 | 0 ==> | 2    |
| 250                                | 1 | 0.222 | 1 ==> | 2    |
| 275                                | 1 | 0.333 | 1 --> | 0    |
| node_53 --> Thyroptera tricolor 8  |   |       |       |      |
| 21                                 | 1 | 0.125 | 0 ==> | 1    |
| 33                                 | 1 | 0.500 | 1 ==> | 0    |
| 69                                 | 1 | 0.154 | 1 ==> | 0    |
| 100                                | 1 | 0.333 | 0 --> | 3    |
| 106                                | 1 | 0.107 | 1 ==> | 0    |
| 117                                | 1 | 0.167 | 1 ==> | 0    |

|                                   |     |       |       |     |       |
|-----------------------------------|-----|-------|-------|-----|-------|
| 139                               | 1   | 0.227 | 1     | ==> | 0     |
| 160                               | 1   | 0.111 | 0     | ==> | 1     |
| 165                               | 1   | 0.125 | 1     | --> | 0     |
| 202                               | 1   | 0.182 | 0     | --> | 1     |
| 207                               | 1   | 0.100 | 0     | --> | 1     |
| 233                               | 1   | 0.286 | 1     | ==> | 0     |
| 236                               | 1   | 0.143 | 0     | ==> | 2     |
| 240                               | 1   | 0.250 | 2     | ==> | 1     |
| 254                               | 2   | 0.182 | 2     | ==> | 0     |
| 255                               | 1   | 0.200 | 1     | ==> | 0     |
| 259                               | 1   | 0.125 | 0     | --> | 1     |
| 262                               | 1   | 0.375 | 0     | ==> | 1     |
| 280                               | 1   | 0.125 | 2     | ==> | 1     |
| node_68 --> node_58               | 71  | 1     | 0.111 | 2   | ==> 1 |
| 74                                | 1   | 0.200 | 1     | --> | 0     |
| 84                                | 1   | 0.200 | 2     | --> | 0     |
| 92                                | 1   | 0.250 | 0     | ==> | 1     |
| 150                               | 1   | 0.200 | 0     | ==> | 1     |
| 161                               | 1   | 0.167 | 0     | ==> | 1     |
| 169                               | 1   | 0.200 | 0     | ==> | 1     |
| 175                               | 1   | 0.143 | 1     | ==> | 2     |
| 252                               | 1   | 0.182 | 0     | ==> | 1     |
| 271                               | 1   | 0.200 | 1     | ==> | 0     |
| 275                               | 1   | 0.333 | 1     | --> | 2     |
| 278                               | 1   | 0.091 | 1     | --> | 0     |
| node_58 --> node_56               | 129 | 1     | 0.154 | 1   | --> 0 |
| 227                               | 1   | 0.286 | 0     | ==> | 1     |
| 253                               | 1   | 0.278 | 1     | --> | 2     |
| node_56 --> node_55               | 15  | 1     | 0.250 | 0   | --> 1 |
| 25                                | 1   | 0.200 | 2     | --> | 3     |
| 29                                | 1   | 0.214 | 1     | --> | 0     |
| 51                                | 1   | 0.167 | 0     | --> | 1     |
| 53                                | 1   | 0.125 | 0     | --> | 1     |
| 57                                | 1   | 0.286 | 0     | --> | 1     |
| 69                                | 1   | 0.154 | 1     | ==> | 0     |
| 98                                | 1   | 0.286 | 4     | ==> | 3     |
| 103                               | 1   | 0.200 | 1     | ==> | 0     |
| 148                               | 2   | 0.143 | 2     | --> | 0     |
| 197                               | 1   | 0.333 | 0     | --> | 1     |
| 198                               | 1   | 0.333 | 0     | --> | 1     |
| 207                               | 1   | 0.100 | 0     | --> | 1     |
| 264                               | 1   | 0.200 | 0     | ==> | 1     |
| 274                               | 1   | 0.250 | 2     | ==> | 1     |
| node_55 --> Vulcanops worthyae 77 | 1   | 0.200 | 0     | ==> | 1     |
| 94                                | 1   | 0.250 | 1     | ==> | 0     |
| 103                               | 1   | 0.200 | 0     | ==> | 1     |
| 108                               | 1   | 0.333 | 0     | ==> | 3     |
| 109                               | 1   | 0.500 | 0     | --> | 1     |
| 110                               | 1   | 0.143 | 2     | ==> | 1     |
| 112                               | 2   | 0.125 | 0     | ==> | 2     |
| 115                               | 1   | 0.333 | 1     | ==> | 0     |

|                                                           |   |       |       |   |
|-----------------------------------------------------------|---|-------|-------|---|
| 124                                                       | 1 | 0.333 | 0 ==> | 3 |
| 125                                                       | 1 | 0.500 | 0 --> | 1 |
| 127                                                       | 1 | 0.138 | 2 ==> | 1 |
| 129                                                       | 2 | 0.154 | 0 ==> | 2 |
| 134                                                       | 1 | 0.200 | 1 ==> | 0 |
| 139                                                       | 1 | 0.227 | 1 ==> | 0 |
| 143                                                       | 1 | 0.200 | 0 ==> | 1 |
| 213                                                       | 1 | 1.000 | 1 ==> | 0 |
| 214                                                       | 1 | 0.333 | 3 ==> | 2 |
| 219                                                       | 1 | 0.125 | 0 ==> | 1 |
| 221                                                       | 1 | 0.143 | 1 ==> | 2 |
| 223                                                       | 1 | 0.222 | 1 ==> | 0 |
| 226                                                       | 1 | 0.111 | 0 ==> | 1 |
| 242                                                       | 1 | 0.333 | 1 --> | 2 |
| 245                                                       | 1 | 0.222 | 0 ==> | 1 |
| 249                                                       | 1 | 0.111 | 0 --> | 1 |
| 254                                                       | 1 | 0.182 | 2 ==> | 1 |
| node_55 --> Mystacina robusta 34      1 0.158 1 ==> 2     |   |       |       |   |
| 56                                                        | 1 | 0.250 | 0 ==> | 1 |
| 61                                                        | 1 | 0.154 | 1 --> | 0 |
| 71                                                        | 1 | 0.111 | 1 ==> | 2 |
| 98                                                        | 1 | 0.286 | 3 ==> | 4 |
| 194                                                       | 1 | 0.143 | 2 ==> | 1 |
| 200                                                       | 1 | 0.500 | 0 --> | 1 |
| 220                                                       | 1 | 0.111 | 0 --> | 1 |
| 236                                                       | 1 | 0.143 | 0 --> | 1 |
| 253                                                       | 1 | 0.278 | 2 ==> | 1 |
| 259                                                       | 1 | 0.125 | 0 --> | 1 |
| node_55 --> Mystacina tuberculata 23      1 0.133 1 ==> 0 |   |       |       |   |
| 49                                                        | 1 | 0.286 | 0 ==> | 1 |
| 71                                                        | 1 | 0.111 | 1 ==> | 2 |
| 94                                                        | 1 | 0.250 | 1 ==> | 0 |
| 127                                                       | 1 | 0.138 | 2 ==> | 3 |
| 165                                                       | 1 | 0.125 | 1 ==> | 2 |
| 167                                                       | 1 | 0.154 | 2 ==> | 1 |
| 210                                                       | 1 | 0.200 | 2 ==> | 1 |
| 220                                                       | 1 | 0.111 | 0 --> | 1 |
| 235                                                       | 1 | 0.250 | 1 ==> | 0 |
| 236                                                       | 1 | 0.143 | 0 --> | 1 |
| 249                                                       | 1 | 0.111 | 0 --> | 1 |
| 259                                                       | 1 | 0.125 | 0 --> | 1 |
| node_55 --> Mystacina miocenalis 74      1 0.200 0 ==> 1  |   |       |       |   |
| 90                                                        | 1 | 0.500 | 1 ==> | 0 |
| 122                                                       | 1 | 0.250 | 3 ==> | 2 |
| 127                                                       | 1 | 0.138 | 2 ==> | 3 |
| node_56 --> Icarops paradox 61      1 0.154 1 --> 0       |   |       |       |   |
| 63                                                        | 1 | 0.125 | 0 ==> | 1 |
| 67                                                        | 1 | 0.143 | 1 ==> | 0 |
| 78                                                        | 1 | 0.200 | 1 ==> | 2 |
| 116                                                       | 1 | 0.167 | 0 ==> | 1 |
| 117                                                       | 1 | 0.167 | 0 --> | 1 |

|                                |     |       |       |     |       |
|--------------------------------|-----|-------|-------|-----|-------|
| 241                            | 1   | 0.250 | 0     | ==> | 1     |
| 267                            | 1   | 0.154 | 1     | --> | 0     |
| 277                            | 1   | 0.091 | 1     | ==> | 0     |
| 280                            | 1   | 0.125 | 2     | ==> | 1     |
| node_58 --> node_57            | 219 | 1     | 0.125 | 0   | ==> 1 |
| 260                            | 1   | 0.250 | 0     | --> | 1     |
| 267                            | 1   | 0.154 | 1     | --> | 0     |
| node_57 --> Icarops aenae      | 97  | 1     | 0.125 | 0   | --> 1 |
| 110                            | 1   | 0.143 | 2     | --> | 1     |
| 253                            | 1   | 0.278 | 1     | --> | 0     |
| 269                            | 1   | 0.222 | 0     | ==> | 1     |
| 280                            | 1   | 0.125 | 2     | ==> | 1     |
| node_67 --> node_66            | 16  | 1     | 0.222 | 0   | --> 1 |
| 18                             | 1   | 0.167 | 0     | --> | 1     |
| 240                            | 1   | 0.250 | 2     | ==> | 1     |
| node_66 --> Natalus stramineus | 5   | 1     | 0.273 | 0   | ==> 2 |
| 7                              | 1   | 1.000 | 0     | --> | 1     |
| 21                             | 1   | 0.125 | 0     | --> | 1     |
| 23                             | 1   | 0.133 | 1     | ==> | 0     |
| 25                             | 1   | 0.200 | 2     | ==> | 1     |
| 29                             | 1   | 0.214 | 1     | --> | 0     |
| 34                             | 1   | 0.158 | 1     | ==> | 0     |
| 40                             | 2   | 0.231 | 2     | ==> | 0     |
| 47                             | 1   | 0.200 | 1     | ==> | 0     |
| 56                             | 1   | 0.250 | 0     | ==> | 1     |
| 58                             | 1   | 0.167 | 2     | --> | 3     |
| 60                             | 2   | 0.158 | 2     | ==> | 0     |
| 61                             | 1   | 0.154 | 1     | --> | 0     |
| 62                             | 2   | 0.667 | 0     | ==> | 2     |
| 65                             | 1   | 0.200 | 1     | ==> | 0     |
| 67                             | 1   | 0.143 | 1     | --> | 2     |
| 69                             | 1   | 0.154 | 1     | ==> | 0     |
| 85                             | 1   | 0.200 | 1     | ==> | 0     |
| 92                             | 1   | 0.250 | 0     | ==> | 1     |
| 97                             | 1   | 0.125 | 0     | --> | 1     |
| 98                             | 1   | 0.286 | 4     | ==> | 3     |
| 105                            | 1   | 0.133 | 1     | ==> | 2     |
| 108                            | 1   | 0.333 | 0     | ==> | 2     |
| 110                            | 1   | 0.143 | 2     | --> | 3     |
| 116                            | 1   | 0.167 | 0     | ==> | 1     |
| 122                            | 1   | 0.250 | 3     | --> | 2     |
| 127                            | 2   | 0.138 | 2     | ==> | 4     |
| 131                            | 1   | 0.444 | 1     | ==> | 0     |
| 135                            | 1   | 0.200 | 0     | ==> | 1     |
| 139                            | 1   | 0.227 | 1     | ==> | 0     |
| 155                            | 1   | 0.200 | 1     | --> | 0     |
| 160                            | 1   | 0.111 | 0     | ==> | 1     |
| 162                            | 1   | 0.364 | 2     | --> | 3     |
| 165                            | 1   | 0.125 | 1     | ==> | 0     |
| 184                            | 1   | 0.143 | 1     | ==> | 0     |
| 186                            | 2   | 0.158 | 3     | ==> | 1     |

|                                     |       |       |     |      |   |
|-------------------------------------|-------|-------|-----|------|---|
| 192                                 | 1     | 0.214 | 1   | ==>  | 2 |
| 207                                 | 1     | 0.100 | 0   | -->  | 1 |
| 236                                 | 1     | 0.143 | 0   | ==>  | 2 |
| 242                                 | 1     | 0.333 | 1   | -->  | 2 |
| 245                                 | 1     | 0.222 | 0   | ==>  | 1 |
| 252                                 | 1     | 0.182 | 0   | ==>  | 1 |
| 259                                 | 2     | 0.125 | 0   | ==>  | 2 |
| 264                                 | 1     | 0.200 | 0   | ==>  | 1 |
| 267                                 | 1     | 0.154 | 1   | -->  | 0 |
| 273                                 | 1     | 1.000 | 0   | ==>  | 1 |
| 275                                 | 1     | 0.333 | 1   | -->  | 2 |
| 278                                 | 1     | 0.091 | 1   | -->  | 0 |
| 280                                 | 1     | 0.125 | 2   | ==>  | 1 |
| node_66 --> node_65                 |       |       |     |      |   |
| 2                                   | 1     | 0.167 | 0   | ==>  | 1 |
| 9                                   | 1     | 0.250 | 0   | -->  | 1 |
| 40                                  | 1     | 0.231 | 2   | -->  | 3 |
| 47                                  | 1     | 0.200 | 1   | ==>  | 2 |
| 67                                  | 1     | 0.143 | 1   | ==>  | 0 |
| 71                                  | 1     | 0.111 | 2   | ==>  | 1 |
| 77                                  | 1     | 0.200 | 0   | ==>  | 1 |
| 120                                 | 1     | 0.143 | 0   | -->  | 1 |
| 136                                 | 1     | 0.500 | 1   | ==>  | 0 |
| 141                                 | 1     | 0.500 | 0   | -->  | 1 |
| 154                                 | 1     | 0.143 | 0   | ==>  | 1 |
| 158                                 | 1     | 0.200 | 1   | ==>  | 0 |
| 163                                 | 1     | 0.200 | 0   | ==>  | 1 |
| 164                                 | 1     | 0.222 | 1   | ==>  | 2 |
| 169                                 | 1     | 0.200 | 0   | ==>  | 1 |
| 187                                 | 2     | 0.158 | 0   | -->  | 2 |
| 254                                 | 2     | 0.182 | 2   | ==>  | 0 |
| 271                                 | 1     | 0.200 | 1   | ==>  | 0 |
| node_65 --> Chalinolobus gouldii 12 |       |       |     |      |   |
| 2                                   | 0.455 | 1     | ==> | {34} |   |
| 13                                  | 2     | 0.273 | 1   | -->  | 3 |
| 16                                  | 1     | 0.222 | 1   | -->  | 2 |
| 24                                  | 1     | 0.100 | 1   | ==>  | 0 |
| 29                                  | 1     | 0.214 | 1   | -->  | 0 |
| 48                                  | 2     | 1.000 | 0   | ==>  | 2 |
| 58                                  | 1     | 0.167 | 2   | -->  | 3 |
| 61                                  | 1     | 0.154 | 1   | -->  | 0 |
| 78                                  | 1     | 0.200 | 1   | -->  | 0 |
| 100                                 | 1     | 0.333 | 0   | ==>  | 3 |
| 110                                 | 1     | 0.143 | 2   | -->  | 3 |
| 120                                 | 1     | 0.143 | 1   | ==>  | 2 |
| 127                                 | 1     | 0.138 | 2   | -->  | 3 |
| 140                                 | 1     | 0.222 | 0   | ==>  | 1 |
| 155                                 | 1     | 0.200 | 1   | -->  | 0 |
| 175                                 | 1     | 0.143 | 1   | ==>  | 2 |
| 186                                 | 1     | 0.158 | 3   | ==>  | 4 |
| 187                                 | 1     | 0.158 | 2   | ==>  | 3 |
| 188                                 | 1     | 0.250 | 0   | ==>  | 1 |
| 202                                 | 1     | 0.182 | 0   | ==>  | 1 |

|                                    |   |       |   |     |   |
|------------------------------------|---|-------|---|-----|---|
| 210                                | 1 | 0.200 | 2 | ==> | 3 |
| 219                                | 1 | 0.125 | 0 | ==> | 1 |
| 227                                | 1 | 0.286 | 0 | ==> | 1 |
| 270                                | 1 | 0.333 | 0 | ==> | 1 |
| 278                                | 1 | 0.091 | 1 | --> | 0 |
| node_65 --> Chaerephon jobensis 15 |   |       |   |     |   |
| 26                                 | 1 | 0.250 | 0 | ==> | 1 |
| 37                                 | 1 | 0.200 | 1 | ==> | 0 |
| 51                                 | 1 | 0.167 | 0 | --> | 1 |
| 84                                 | 1 | 0.200 | 2 | ==> | 0 |
| 103                                | 1 | 0.200 | 1 | ==> | 0 |
| 105                                | 1 | 0.133 | 1 | ==> | 0 |
| 106                                | 2 | 0.107 | 0 | ==> | 2 |
| 108                                | 1 | 0.333 | 0 | ==> | 1 |
| 110                                | 1 | 0.143 | 2 | ==> | 1 |
| 111                                | 1 | 0.111 | 0 | ==> | 1 |
| 112                                | 1 | 0.125 | 0 | --> | 1 |
| 122                                | 1 | 0.250 | 3 | --> | 2 |
| 123                                | 1 | 0.167 | 1 | ==> | 0 |
| 124                                | 1 | 0.333 | 0 | ==> | 1 |
| 127                                | 1 | 0.138 | 2 | ==> | 1 |
| 128                                | 1 | 0.143 | 0 | ==> | 1 |
| 139                                | 1 | 0.227 | 1 | ==> | 2 |
| 146                                | 1 | 0.250 | 1 | ==> | 0 |
| 152                                | 1 | 0.333 | 1 | ==> | 0 |
| 162                                | 1 | 0.364 | 2 | --> | 3 |
| 167                                | 1 | 0.154 | 2 | --> | 1 |
| 176                                | 2 | 0.400 | 0 | --> | 2 |
| 182                                | 1 | 0.200 | 0 | --> | 1 |
| 185                                | 1 | 0.250 | 0 | ==> | 1 |
| 190                                | 1 | 0.167 | 0 | ==> | 1 |
| 192                                | 1 | 0.214 | 1 | --> | 3 |
| 195                                | 1 | 0.182 | 0 | ==> | 1 |
| 197                                | 1 | 0.333 | 0 | ==> | 1 |
| 198                                | 1 | 0.333 | 0 | ==> | 1 |
| 215                                | 1 | 0.143 | 1 | ==> | 0 |
| 221                                | 1 | 0.143 | 1 | ==> | 0 |
| 222                                | 1 | 0.500 | 0 | ==> | 2 |
| 226                                | 1 | 0.111 | 0 | ==> | 1 |
| 229                                | 1 | 1.000 | 0 | ==> | 1 |
| 231                                | 1 | 0.333 | 0 | ==> | 1 |
| 249                                | 1 | 0.111 | 0 | ==> | 1 |
| 253                                | 1 | 0.278 | 1 | ==> | 0 |
| 277                                | 1 | 0.091 | 0 | --> | 1 |
| node_64 --> node_62                |   |       |   |     |   |
| 21                                 | 1 | 0.125 | 0 | --> | 1 |
| 39                                 | 1 | 0.333 | 0 | --> | 1 |
| 67                                 | 1 | 0.143 | 1 | --> | 2 |
| 77                                 | 1 | 0.200 | 0 | ==> | 1 |
| 79                                 | 1 | 1.000 | 0 | ==> | 1 |
| 155                                | 1 | 0.200 | 1 | --> | 0 |
| 187                                | 2 | 0.158 | 0 | --> | 2 |

|                             |     |   |       |   |     |   |
|-----------------------------|-----|---|-------|---|-----|---|
|                             | 188 | 1 | 0.250 | 0 | --> | 1 |
|                             | 242 | 1 | 0.333 | 1 | --> | 2 |
|                             | 275 | 1 | 0.333 | 1 | --> | 2 |
| node_62 --> node_61         | 175 | 1 | 0.143 | 1 | ==> | 2 |
|                             | 186 | 1 | 0.158 | 3 | ==> | 4 |
|                             | 187 | 1 | 0.158 | 2 | ==> | 3 |
|                             | 206 | 1 | 0.286 | 1 | --> | 2 |
|                             | 209 | 1 | 1.000 | 1 | ==> | 2 |
|                             | 221 | 1 | 0.143 | 1 | --> | 2 |
|                             | 227 | 1 | 0.286 | 0 | ==> | 1 |
|                             | 249 | 1 | 0.111 | 0 | ==> | 1 |
|                             | 252 | 1 | 0.182 | 0 | ==> | 1 |
|                             | 264 | 1 | 0.200 | 0 | ==> | 1 |
|                             | 271 | 1 | 0.200 | 1 | ==> | 0 |
| node_61 --> node_60         | 215 | 1 | 0.143 | 0 | --> | 1 |
|                             | 278 | 1 | 0.091 | 1 | ==> | 0 |
| node_60 --> node_59         | 1   | 1 | 0.100 | 0 | --> | 1 |
|                             | 2   | 1 | 0.167 | 0 | --> | 1 |
|                             | 8   | 1 | 0.500 | 0 | --> | 1 |
|                             | 13  | 1 | 0.273 | 1 | --> | 0 |
|                             | 18  | 1 | 0.167 | 0 | --> | 1 |
|                             | 40  | 2 | 0.231 | 2 | --> | 0 |
|                             | 44  | 2 | 1.000 | 0 | --> | 2 |
|                             | 47  | 1 | 0.200 | 1 | --> | 2 |
|                             | 60  | 2 | 0.158 | 2 | --> | 0 |
|                             | 61  | 1 | 0.154 | 1 | --> | 0 |
|                             | 65  | 1 | 0.200 | 1 | --> | 0 |
|                             | 69  | 1 | 0.154 | 1 | --> | 2 |
|                             | 86  | 1 | 0.400 | 0 | --> | 1 |
|                             | 98  | 1 | 0.286 | 0 | --> | 2 |
|                             | 110 | 2 | 0.143 | 2 | --> | 4 |
|                             | 118 | 1 | 0.375 | 4 | --> | 2 |
|                             | 119 | 1 | 0.333 | 0 | --> | 1 |
|                             | 127 | 2 | 0.138 | 2 | --> | 4 |
|                             | 132 | 1 | 0.250 | 0 | --> | 1 |
|                             | 134 | 1 | 0.200 | 1 | --> | 0 |
|                             | 139 | 1 | 0.227 | 1 | --> | 0 |
|                             | 146 | 1 | 0.250 | 1 | --> | 0 |
|                             | 148 | 1 | 0.143 | 2 | --> | 1 |
|                             | 159 | 1 | 0.250 | 0 | --> | 1 |
|                             | 160 | 1 | 0.111 | 0 | --> | 1 |
|                             | 162 | 1 | 0.364 | 2 | --> | 3 |
|                             | 173 | 2 | 0.286 | 2 | --> | 0 |
|                             | 194 | 1 | 0.143 | 2 | --> | 1 |
|                             | 228 | 1 | 1.000 | 0 | ==> | 1 |
|                             | 277 | 1 | 0.091 | 0 | --> | 1 |
|                             | 280 | 1 | 0.125 | 2 | ==> | 1 |
| node_59 --> Myzopoda aurita | 92  | 1 | 0.250 | 0 | ==> | 1 |
|                             | 94  | 1 | 0.250 | 1 | --> | 0 |
|                             | 152 | 1 | 0.333 | 1 | ==> | 0 |
|                             | 172 | 1 | 0.167 | 0 | ==> | 1 |

|                                             |   |       |         |                 |
|---------------------------------------------|---|-------|---------|-----------------|
| 259                                         | 1 | 0.125 | 0 ==> 1 |                 |
| 267                                         | 1 | 0.154 | 1 ==> 0 |                 |
| node_59 --> Myzopoda schliemanni 16         |   |       |         | 1 0.222 0 --> 1 |
| 29                                          | 1 | 0.214 | 1 --> 0 |                 |
| 34                                          | 1 | 0.158 | 1 ==> 0 |                 |
| 43                                          | 1 | 0.600 | 2 ==> 3 |                 |
| 78                                          | 1 | 0.200 | 1 --> 0 |                 |
| 154                                         | 1 | 0.143 | 0 ==> 1 |                 |
| 194                                         | 1 | 0.143 | 1 ==> 0 |                 |
| 231                                         | 1 | 0.333 | 0 ==> 1 |                 |
| 241                                         | 1 | 0.250 | 0 --> 1 |                 |
| 254                                         | 1 | 0.182 | 2 --> 1 |                 |
| node_60 --> Phasmatonycteris butleri 219    |   |       |         | 1 0.125 0 --> 1 |
| 254                                         | 1 | 0.182 | 2 --> 1 |                 |
| node_61 --> Phasmatonycteris phiomensis 219 |   |       |         | 1 0.125 0 --> 1 |
| 241                                         | 1 | 0.250 | 0 --> 1 |                 |
| 253                                         | 1 | 0.278 | 1 ==> 2 |                 |
| node_62 --> Saccopteryx bilineata 3         |   |       |         | 1 1.000 0 ==> 1 |
| 17                                          | 1 | 0.200 | 0 --> 1 |                 |
| 23                                          | 1 | 0.133 | 1 ==> 2 |                 |
| 24                                          | 1 | 0.100 | 1 ==> 0 |                 |
| 34                                          | 1 | 0.158 | 1 ==> 2 |                 |
| 43                                          | 2 | 0.600 | 2 ==> 0 |                 |
| 46                                          | 1 | 0.250 | 0 ==> 1 |                 |
| 58                                          | 1 | 0.167 | 2 ==> 1 |                 |
| 59                                          | 1 | 0.125 | 1 ==> 0 |                 |
| 60                                          | 1 | 0.158 | 2 ==> 3 |                 |
| 63                                          | 2 | 0.125 | 0 ==> 2 |                 |
| 66                                          | 1 | 0.286 | 0 --> 1 |                 |
| 69                                          | 1 | 0.154 | 1 ==> 0 |                 |
| 85                                          | 1 | 0.200 | 1 ==> 0 |                 |
| 94                                          | 1 | 0.250 | 1 --> 0 |                 |
| 95                                          | 1 | 1.000 | 0 ==> 1 |                 |
| 102                                         | 1 | 0.200 | 1 --> 2 |                 |
| 103                                         | 1 | 0.200 | 1 ==> 0 |                 |
| 105                                         | 2 | 0.133 | 0 ==> 2 |                 |
| 106                                         | 3 | 0.107 | 0 ==> 3 |                 |
| 108                                         | 1 | 0.333 | 0 ==> 2 |                 |
| 110                                         | 1 | 0.143 | 2 ==> 1 |                 |
| 111                                         | 1 | 0.111 | 0 --> 1 |                 |
| 112                                         | 1 | 0.125 | 0 --> 1 |                 |
| 116                                         | 1 | 0.167 | 0 ==> 1 |                 |
| 117                                         | 1 | 0.167 | 0 ==> 1 |                 |
| 120                                         | 1 | 0.143 | 0 --> 1 |                 |
| 122                                         | 1 | 0.250 | 3 ==> 2 |                 |
| 123                                         | 2 | 0.167 | 0 ==> 2 |                 |
| 124                                         | 1 | 0.333 | 0 ==> 1 |                 |
| 128                                         | 1 | 0.143 | 0 --> 1 |                 |
| 129                                         | 1 | 0.154 | 1 --> 2 |                 |
| 135                                         | 1 | 0.200 | 0 --> 1 |                 |
| 139                                         | 1 | 0.227 | 1 --> 2 |                 |

|                                       |   |       |   |     |   |
|---------------------------------------|---|-------|---|-----|---|
| 153                                   | 1 | 0.222 | 2 | --> | 1 |
| 163                                   | 1 | 0.200 | 0 | ==> | 1 |
| 164                                   | 1 | 0.222 | 1 | ==> | 2 |
| 165                                   | 1 | 0.125 | 1 | ==> | 2 |
| 167                                   | 1 | 0.154 | 2 | ==> | 1 |
| 169                                   | 1 | 0.200 | 0 | ==> | 1 |
| 184                                   | 1 | 0.143 | 1 | ==> | 0 |
| 193                                   | 1 | 0.200 | 1 | ==> | 0 |
| 208                                   | 1 | 0.250 | 0 | ==> | 1 |
| 223                                   | 1 | 0.222 | 1 | ==> | 2 |
| 226                                   | 1 | 0.111 | 0 | ==> | 1 |
| 232                                   | 1 | 0.200 | 1 | ==> | 0 |
| 234                                   | 1 | 0.200 | 1 | --> | 0 |
| 236                                   | 1 | 0.143 | 0 | ==> | 1 |
| 247                                   | 1 | 0.200 | 1 | ==> | 0 |
| 250                                   | 1 | 0.222 | 1 | ==> | 0 |
| 255                                   | 1 | 0.200 | 1 | ==> | 0 |
| 259                                   | 1 | 0.125 | 0 | ==> | 1 |
| 267                                   | 1 | 0.154 | 1 | --> | 0 |
| 274                                   | 1 | 0.250 | 1 | --> | 2 |
| 277                                   | 1 | 0.091 | 0 | --> | 1 |
| node_63 --> Hipposideros commersoni 1 |   |       |   |     |   |
| 15                                    | 1 | 0.250 | 0 | ==> | 1 |
| 21                                    | 1 | 0.125 | 0 | --> | 1 |
| 23                                    | 1 | 0.133 | 1 | ==> | 2 |
| 25                                    | 1 | 0.200 | 2 | ==> | 3 |
| 34                                    | 1 | 0.158 | 1 | ==> | 2 |
| 35                                    | 1 | 0.500 | 0 | --> | 1 |
| 36                                    | 1 | 0.333 | 0 | --> | 1 |
| 39                                    | 1 | 0.333 | 0 | --> | 1 |
| 40                                    | 1 | 0.231 | 2 | ==> | 1 |
| 43                                    | 2 | 0.600 | 2 | ==> | 0 |
| 46                                    | 1 | 0.250 | 0 | ==> | 1 |
| 58                                    | 1 | 0.167 | 2 | ==> | 3 |
| 63                                    | 1 | 0.125 | 0 | ==> | 1 |
| 66                                    | 1 | 0.286 | 0 | --> | 1 |
| 83                                    | 1 | 0.200 | 0 | --> | 1 |
| 86                                    | 1 | 0.400 | 0 | --> | 1 |
| 98                                    | 1 | 0.286 | 0 | --> | 1 |
| 106                                   | 1 | 0.107 | 0 | --> | 1 |
| 131                                   | 1 | 0.444 | 1 | --> | 2 |
| 139                                   | 4 | 0.227 | 1 | --> | 5 |
| 140                                   | 2 | 0.222 | 0 | --> | 2 |
| 141                                   | 1 | 0.500 | 0 | --> | 1 |
| 143                                   | 1 | 0.200 | 0 | --> | 1 |
| 162                                   | 1 | 0.364 | 2 | --> | 3 |
| 174                                   | 1 | 0.167 | 0 | ==> | 1 |
| 202                                   | 1 | 0.182 | 0 | --> | 1 |
| 207                                   | 1 | 0.100 | 0 | --> | 1 |
| 220                                   | 2 | 0.111 | 0 | --> | 2 |
| 251                                   | 2 | 0.333 | 0 | --> | 2 |
| 1 0.100 0 --> 1                       |   |       |   |     |   |

|                                                         |   |       |         |
|---------------------------------------------------------|---|-------|---------|
| 263                                                     | 2 | 0.222 | 0 --> 2 |
| 276                                                     | 1 | 0.500 | 0 --> 1 |
| node_63 --> Pteropus scapulatus 12      1 0.455 1 ==> 0 |   |       |         |
| 17                                                      | 1 | 0.200 | 0 --> 1 |
| 25                                                      | 2 | 0.200 | 2 ==> 0 |
| 29                                                      | 1 | 0.214 | 2 ==> 3 |
| 34                                                      | 1 | 0.158 | 1 ==> 0 |
| 37                                                      | 1 | 0.200 | 1 ==> 0 |
| 49                                                      | 2 | 0.286 | 0 --> 2 |
| 56                                                      | 2 | 0.250 | 0 --> 2 |
| 57                                                      | 2 | 0.286 | 0 --> 2 |
| 58                                                      | 2 | 0.167 | 2 ==> 0 |
| 59                                                      | 1 | 0.125 | 1 ==> 0 |
| 61                                                      | 1 | 0.154 | 1 ==> 2 |
| 67                                                      | 1 | 0.143 | 1 --> 2 |
| 68                                                      | 1 | 0.500 | 0 ==> 1 |
| 70                                                      | 1 | 0.400 | 2 ==> 1 |
| 73                                                      | 1 | 1.000 | 0 ==> 1 |
| 130                                                     | 1 | 0.333 | 0 ==> 1 |
| 145                                                     | 1 | 0.667 | 0 ==> 4 |
| 148                                                     | 1 | 0.143 | 2 ==> 1 |
| 149                                                     | 1 | 0.333 | 0 ==> 1 |
| 151                                                     | 1 | 0.400 | 0 --> 3 |
| 159                                                     | 1 | 0.250 | 0 ==> 1 |
| 160                                                     | 1 | 0.111 | 0 ==> 1 |
| 165                                                     | 1 | 0.125 | 1 ==> 0 |
| 167                                                     | 2 | 0.154 | 2 ==> 0 |
| 171                                                     | 1 | 1.000 | 0 ==> 1 |
| 178                                                     | 1 | 0.250 | 0 --> 1 |
| 185                                                     | 2 | 0.250 | 0 --> 2 |
| 194                                                     | 1 | 0.143 | 1 ==> 0 |
| 195                                                     | 1 | 0.182 | 0 ==> 2 |
| 210                                                     | 1 | 0.200 | 1 ==> 0 |
| 211                                                     | 1 | 0.500 | 0 ==> 1 |
| 235                                                     | 1 | 0.250 | 1 ==> 0 |
| 258                                                     | 1 | 1.000 | 0 ==> 1 |
| 266                                                     | 1 | 0.500 | 0 ==> 1 |
| 267                                                     | 1 | 0.154 | 1 ==> 2 |
| 268                                                     | 1 | 0.500 | 0 ==> 1 |
| 269                                                     | 2 | 0.222 | 0 --> 2 |
